# Supplementary material for: Correcting signal biases and detecting regulatory elements in STARR-seq data
Source: HighWire-hosted journal article supplement (doi:10.1101/gr.269209.120), 2021-03-15
Supplement: Supplemental_Table_S1.xlsx [file Supplemental_Table_S1.xlsx]

## Sheet: Sheet1
Table S1: Inhibitor-responsive regulatory elements in Muerdter et al. data that were detected by CRADLE. Regulatory element type indicates activating and repressive regulatory elements for '1' and '-1', respectively.
chromosome	start	end	regulatory element type	p value	effect size
chr1	850738	852238	1	0.00246787	120
chr1	881863	882238	1	0.00546125	76
chr1	915238	915988	1	0.0171407	71
chr1	942988	943738	1	0.00936125	86
chr1	1006738	1007488	1	0.000375535	77
chr1	1011988	1013863	-1	0.0113322	-121
chr1	1014113	1014238	-1	0.0555862	-34
chr1	1021113	1022238	1	0.00372291	130
chr1	1050613	1050738	1	0.00117647	97
chr1	1051363	1051738	1	0.0029414	64
chr1	1063113	1064238	1	0.0173016	160
chr1	1068988	1069738	-1	0.00674905	-69
chr1	1204738	1205363	1	0.0238416	88
chr1	1214613	1215738	1	0.0140875	94
chr1	1237988	1238488	-1	0.00295907	-78
chr1	1264238	1266238	1	0.00263309	236
chr1	1397488	1398113	1	0.0152646	65
chr1	1662988	1663363	1	1.11892e-05	89
chr1	1984738	1985363	-1	0.0234255	-78
chr1	2097238	2098738	1	0.004324	143
chr1	2129488	2130238	1	0.00425564	85
chr1	2250988	2251738	1	0.00644249	70
chr1	2255488	2256988	-1	0.00495454	-94
chr1	2290738	2290988	-1	0.0243391	-100
chr1	2316988	2317738	-1	0.000370222	-80
chr1	2804790	2805415	1	0.0249308	80
chr1	2874540	2875290	-1	0.00643715	-72
chr1	2884915	2885415	1	0.00317982	102
chr1	2907790	2908165	1	0.00844918	119
chr1	3375790	3376040	1	0.00676963	75
chr1	3603415	3603540	1	0.0132306	81
chr1	3976415	3977165	1	0.00504252	106
chr1	3977415	3977790	1	0.0131788	135
chr1	3978415	3979040	1	0.00313045	78
chr1	4108290	4108540	1	0.00521707	185
chr1	4356165	4356540	1	0.00985687	118
chr1	4379790	4381165	1	0.0166587	198
chr1	4585165	4586665	1	0.000626781	261
chr1	4592915	4593165	1	0.00358772	70
chr1	4637040	4637165	1	0.0408191	39
chr1	4637415	4639040	1	0.0151193	240
chr1	4668540	4669915	1	0.000263435	169
chr1	4721040	4721415	1	0.00441968	94
chr1	4732290	4733790	1	0.0130656	120
chr1	4735540	4736040	1	0.0225192	84
chr1	4961790	4963290	1	0.00924541	83
chr1	5034540	5035290	1	0.00225375	107
chr1	5084665	5084790	1	0.00256886	78
chr1	5218290	5218665	1	0.0070226	128
chr1	5305290	5306040	1	0.00558442	74
chr1	5333040	5333790	1	0.0064211	103
chr1	5348040	5350290	1	0.00341351	181
chr1	5422290	5422415	1	0.00465103	78
chr1	5422665	5422790	1	0.0108534	78
chr1	5474040	5474790	1	0.00485321	101
chr1	5508540	5510040	1	0.0494408	103
chr1	5611290	5611915	1	0.00740119	126
chr1	5612665	5612790	1	0.0344298	37
chr1	5669040	5669790	1	0.0208272	85
chr1	5887290	5887415	-1	0.000732433	-62
chr1	5966790	5969040	1	0.00463209	183
chr1	6072665	6074040	1	0.000391053	106
chr1	6112415	6113040	1	0.0126392	92
chr1	6170040	6170790	-1	0.0310481	-91
chr1	6186540	6187290	1	0.0528996	78
chr1	6197790	6198540	1	0.00611616	69
chr1	6225915	6226040	1	0.00402387	81
chr1	6294540	6295290	1	0.0243337	76
chr1	6300915	6301540	1	0.00250474	151
chr1	6301915	6302290	1	0.0256946	186
chr1	6428290	6428790	1	0.0515439	95
chr1	6597540	6598290	-1	0.0123964	-67
chr1	6734040	6735540	1	0.00110308	75
chr1	7124040	7124415	1	0.0100297	64
chr1	7124665	7124915	1	0.0108548	113
chr1	7125165	7125540	1	0.00100564	107
chr1	7225290	7226040	1	0.0143596	72
chr1	7400915	7403040	1	0.00317149	330
chr1	7661040	7661790	1	0.00216917	79
chr1	7869040	7870790	1	0.00172804	211
chr1	7940165	7941540	1	0.000756064	215
chr1	7962540	7963040	1	0.0138805	164
chr1	8047290	8048540	1	0.00508888	117
chr1	8095040	8097415	1	0.0109556	90
chr1	8134415	8135290	1	0.00631365	107
chr1	8147040	8147165	1	0.00165971	81
chr1	8294040	8294790	1	0.00999604	74
chr1	8393915	8395290	1	0.006699	137
chr1	8554290	8555915	1	0.00259281	105
chr1	8556290	8557290	1	0.00661729	86
chr1	8626290	8627040	1	0.0166414	88
chr1	8712665	8713915	1	0.000752829	84
chr1	8874665	8875290	1	0.0102375	73
chr1	9110040	9112290	1	0.000402668	264
chr1	9221040	9221290	1	0.0110055	65
chr1	9221665	9221790	1	0.0446041	58
chr1	9290040	9290790	1	0.0206438	119
chr1	9355290	9356040	1	0.018514	98
chr1	9449040	9449165	1	0.0208533	71
chr1	9449540	9449790	1	0.00868421	85
chr1	9596790	9597540	1	0.0376139	81
chr1	9598290	9599040	1	0.014308	71
chr1	9614040	9615540	-1	0.000733817	-76
chr1	9731415	9731540	1	0.0039723	133
chr1	9942540	9942665	1	0.00255016	157
chr1	10108165	10108790	1	0.0178004	87
chr1	10160040	10160915	1	0.00409291	115
chr1	10325415	10326665	1	0.00811044	348
chr1	10403915	10404540	1	0.0163212	93
chr1	10416040	10416165	1	0.0103061	76
chr1	10416665	10416790	1	0.000173367	80
chr1	10418915	10420290	1	0.000288284	85
chr1	10528290	10528415	1	0.0172487	112
chr1	10528915	10529290	1	0.0161893	147
chr1	10529540	10529665	1	0.0128816	122
chr1	10530165	10530665	1	0.0122129	111
chr1	10598790	10600290	1	0.00111034	183
chr1	10657540	10657665	1	0.00249461	83
chr1	11068290	11069040	1	0.0202257	87
chr1	11130290	11130415	1	0.00788366	60
chr1	11354790	11356290	1	0.000477448	108
chr1	11658415	11659290	1	0.000149983	223
chr1	11659665	11660040	1	0.0407873	56
chr1	11828790	11830040	1	0.00849381	316
chr1	11839415	11839665	1	0.00933041	72
chr1	11840165	11840290	1	0.0232649	62
chr1	11992290	11993040	1	0.00114863	77
chr1	12355790	12356040	1	0.00587751	107
chr1	12378540	12379290	1	0.0155674	70
chr1	12572040	12572290	1	0.0036801	92
chr1	12572665	12573540	1	0.019888	144
chr1	12637165	12637540	1	0.0156989	119
chr1	13512134	13512884	1	0.00154393	69
chr1	13953884	13954634	1	0.00360845	82
chr1	13964384	13966634	1	0.00593208	136
chr1	14116884	14117134	1	0.00316196	92
chr1	14131384	14132009	1	0.00241498	131
chr1	14195384	14196134	-1	0.00175702	-87
chr1	14281634	14282384	1	0.0450687	68
chr1	14429009	14430134	1	0.00122447	114
chr1	14479009	14480384	1	0.00138715	151
chr1	14542634	14542759	1	0.00450364	122
chr1	14543134	14543384	1	0.024551	224
chr1	14543759	14544384	1	0.000977875	177
chr1	14621384	14622009	1	0.00367308	88
chr1	14825384	14827384	1	0.000217209	228
chr1	14862134	14862884	1	0.00090641	106
chr1	14963009	14963384	1	0.00344209	58
chr1	15288884	15290509	1	0.00285543	238
chr1	15345134	15345884	1	0.0108445	183
chr1	15351884	15353384	1	0.00831554	122
chr1	15484634	15484884	1	0.0042629	65
chr1	15952634	15953384	1	0.0444158	124
chr1	15985884	15986759	1	0.00651538	162
chr1	16075634	16075884	1	0.00444388	86
chr1	16133384	16134884	1	0.0104025	120
chr1	16144884	16146134	-1	0.0104651	-90
chr1	16237759	16238384	1	0.0282588	84
chr1	16611884	16612009	1	0.00669691	89
chr1	16614134	16614884	-1	0.021293	-77
chr1	16616384	16617134	1	0.0330122	97
chr1	16685575	16686575	1	0.00347966	128
chr1	16780575	16781700	1	0.0356166	193
chr1	16921913	16922663	-1	0.00936096	-74
chr1	16971413	16971538	1	0.0114275	79
chr1	17098538	17099288	1	0.00560476	114
chr1	17207163	17207288	1	0.0161931	77
chr1	17207788	17208288	1	0.00278424	201
chr1	17394413	17394913	1	0.0081524	83
chr1	17630538	17630663	-1	0.00983819	-101
chr1	17749163	17750663	1	0.00354249	80
chr1	18077663	18078288	1	0.014811	80
chr1	18143663	18144163	1	0.0180004	93
chr1	18201413	18202163	1	0.00591132	104
chr1	18336413	18337913	1	0.00442772	142
chr1	18685413	18685538	1	0.0144334	72
chr1	18722413	18722663	1	0.017512	96
chr1	18725663	18727038	1	0.00959184	90
chr1	18859913	18860663	1	0.00139999	111
chr1	18872288	18872413	1	0.00309218	78
chr1	18965038	18966413	1	0.00321152	209
chr1	19049913	19050788	1	0.0107405	89
chr1	19076788	19077038	1	0.00153754	89
chr1	19080413	19081913	1	0.006033	193
chr1	19082163	19082538	1	0.0138611	102
chr1	19157038	19157288	1	0.00106291	92
chr1	19625663	19626288	1	2.26992e-05	68
chr1	19676538	19676913	1	0.00431538	114
chr1	19677163	19677288	1	0.0052394	72
chr1	19757038	19757663	1	0.00860345	90
chr1	19859163	19859413	1	0.0196118	86
chr1	19860038	19861163	1	0.000217145	164
chr1	19967663	19968413	1	0.00548698	100
chr1	20035163	20035913	1	0.0221696	100
chr1	20210788	20211788	1	0.0112566	266
chr1	20266163	20266663	1	0.00146778	93
chr1	20271663	20272163	1	0.0155257	97
chr1	20603663	20605163	1	0.000812881	110
chr1	20685538	20685663	1	0.00846616	74
chr1	20732663	20733413	1	0.013431	89
chr1	20739163	20739288	1	0.00720394	125
chr1	21022163	21022913	1	0.0112633	93
chr1	21248288	21248663	1	0.0174292	78
chr1	21294913	21295038	1	0.0137838	107
chr1	21324538	21325913	1	0.00259129	219
chr1	21343163	21344538	-1	0.000204167	-85
chr1	21349163	21349913	1	0.039741	75
chr1	21465538	21467663	1	0.0108572	238
chr1	21619163	21619913	1	0.011595	67
chr1	21846413	21847038	1	0.00516161	97
chr1	21851913	21853163	1	0.00463796	129
chr1	21939413	21940163	1	0.00893761	76
chr1	22025038	22025538	1	0.0226431	76
chr1	22228538	22228913	1	0.0015754	133
chr1	22325538	22325663	1	0.00371408	96
chr1	22489913	22490663	1	0.00275725	93
chr1	23188413	23188538	1	0.0609091	179
chr1	23188788	23189538	1	0.000358535	245
chr1	23194413	23195663	1	0.00372192	106
chr1	23224913	23225413	1	0.00401471	119
chr1	23697413	23698163	1	0.0455474	70
chr1	23821913	23822663	1	0.0144674	98
chr1	23951038	23951413	1	0.0026484	75
chr1	23959913	23961413	1	0.0149355	142
chr1	24154913	24155663	1	0.0334634	107
chr1	24179038	24180413	1	0.00437042	87
chr1	24294413	24295038	1	0.0286303	97
chr1	24551663	24552413	1	0.028578	74
chr1	24785663	24787038	1	0.0224763	156
chr1	24907413	24908413	1	0.00305351	116
chr1	25032663	25032788	1	0.0285901	80
chr1	25033038	25033163	1	0.00662927	47
chr1	25096163	25096913	-1	0.0142274	-67
chr1	25812663	25813163	1	0.0421328	73
chr1	26182788	26183663	1	0.0108974	75
chr1	26184413	26184788	1	0.0020638	74
chr1	26267663	26268413	1	0.0093819	182
chr1	26268788	26268913	1	0.0406823	134
chr1	26302913	26303663	1	0.000799953	120
chr1	26336913	26337163	1	0.00220559	83
chr1	26898038	26898163	1	0.00446785	81
chr1	26999413	27000038	1	0.00439798	267
chr1	27021913	27022163	1	0.00068702	81
chr1	27260663	27262038	1	0.0117461	82
chr1	27331288	27331413	1	0.0152159	94
chr1	27362913	27364163	-1	0.00270886	-80
chr1	27671663	27672413	-1	0.0199517	-104
chr1	28505788	28506288	1	0.0228025	86
chr1	28594538	28595663	1	0.00657499	150
chr1	29196413	29197163	1	0.0268858	71
chr1	29206038	29206163	1	0.0162151	95
chr1	29215288	29216163	1	0.0163321	105
chr1	29311788	29311913	1	0.0078577	71
chr1	29417913	29418413	1	0.0125582	80
chr1	29585585	29585710	1	0.00234257	100
chr1	29904335	29906335	1	0.00315899	119
chr1	29974210	29975085	1	0.00140364	233
chr1	30109585	30109710	1	0.0385057	162
chr1	30109960	30110710	1	0.00213547	221
chr1	30285835	30286585	1	0.00943008	97
chr1	30966085	30967585	1	0.000186998	120
chr1	31240960	31242085	-1	0.0133138	-101
chr1	31470835	31471210	1	0.00152789	141
chr1	31486710	31487335	-1	0.0330477	-71
chr1	31691460	31692835	1	0.0174618	91
chr1	31761210	31761835	1	0.0131541	105
chr1	32246335	32247710	-1	0.0178007	-73
chr1	32431960	32433085	1	0.00597078	113
chr1	32779835	32780085	1	0.0126404	94
chr1	32829460	32829835	1	0.0305262	80
chr1	33010585	33011585	-1	0.000612942	-108
chr1	33128335	33129085	1	0.0193584	78
chr1	33327835	33328585	1	0.00119173	88
chr1	33623335	33623460	1	0.0419137	65
chr1	33623710	33624335	1	0.000654376	80
chr1	33624585	33624835	1	0.0024541	76
chr1	33883585	33884460	1	0.00147075	190
chr1	34022335	34023085	1	0.00334798	92
chr1	34496585	34497835	1	0.00173006	101
chr1	34661460	34661710	1	0.0297578	60
chr1	34866460	34867585	1	0.000851341	139
chr1	35279460	35280085	1	0.00211579	88
chr1	35449085	35450335	1	0.0099886	126
chr1	35456335	35457085	1	0.0168052	86
chr1	35747335	35749585	1	0.00270611	124
chr1	35894210	35894835	1	0.00917812	154
chr1	36080335	36080460	1	0.0102941	91
chr1	36088710	36090085	-1	0.000321628	-98
chr1	36373585	36374335	1	0.00809504	122
chr1	36706710	36706835	1	0.0260605	79
chr1	36707710	36707960	1	0.0125131	123
chr1	36804960	36806210	1	0.0102087	75
chr1	36963835	36965085	1	0.0164647	78
chr1	37455460	37455585	1	0.00450556	354
chr1	37478710	37479835	1	0.0177121	254
chr1	37480585	37480960	1	0.0036273	108
chr1	37533835	37533960	1	0.00341499	49
chr1	37945585	37946085	1	0.0157045	68
chr1	38121210	38121835	1	0.0040177	71
chr1	38213585	38213710	1	0.00380234	70
chr1	38541085	38541835	1	0.0347008	79
chr1	38856835	38857335	1	0.00105908	117
chr1	39309085	39309710	1	0.027205	75
chr1	39471960	39474085	1	0.0017062	176
chr1	39540835	39542210	1	0.00233604	178
chr1	39650335	39651085	1	0.023742	67
chr1	39681210	39681835	1	0.0132609	79
chr1	39792960	39793585	1	0.00812158	85
chr1	40069960	40071335	1	0.000761851	268
chr1	40091335	40092085	1	0.00493385	90
chr1	40267710	40268960	1	0.0109868	132
chr1	40300335	40300585	1	0.00616143	66
chr1	40853335	40853960	1	0.0191099	82
chr1	40898210	40899835	1	0.00384979	276
chr1	41485460	41487085	1	0.00998721	188
chr1	41613835	41613960	1	0.00749706	107
chr1	41687335	41687960	1	0.009955	71
chr1	41738335	41739835	1	0.000269061	179
chr1	41811835	41811960	1	0.00404884	123
chr1	42250210	42251335	1	0.0128878	137
chr1	43051585	43052335	1	0.0295152	81
chr1	43206085	43208335	1	0.00473596	252
chr1	43224085	43224835	1	0.0334797	68
chr1	43471585	43473835	1	0.0010451	194
chr1	43475335	43476835	1	0.00165422	209
chr1	43874835	43874960	1	0.000651315	90
chr1	43875335	43875460	1	0.00559728	151
chr1	43972585	43972960	1	0.000189108	77
chr1	43989085	43990460	1	0.0048973	92
chr1	45004710	45005335	1	0.0177359	81
chr1	45034710	45035335	1	0.0103318	81
chr1	45576085	45576835	1	0.0169248	69
chr1	46419085	46419835	1	0.00165261	75
chr1	46624835	46624960	1	0.00709476	334
chr1	46767835	46770085	1	0.000909344	245
chr1	46909585	46910335	1	0.00898755	84
chr1	47512210	47513710	1	0.00813281	232
chr1	47558335	47559085	1	0.00388982	89
chr1	47697085	47697460	1	0.00577906	85
chr1	47757835	47759335	1	0.00377592	131
chr1	47765335	47766085	1	0.00250514	78
chr1	48061585	48062335	1	0.0104624	73
chr1	48102085	48103585	1	0.000965402	122
chr1	48195085	48195835	1	0.0171193	70
chr1	48725835	48726085	1	0.0137919	71
chr1	48784585	48785335	1	0.000400258	106
chr1	48854335	48854960	1	0.00434183	77
chr1	50226460	50226585	1	0.00288068	87
chr1	50671210	50671460	1	0.0156041	101
chr1	51558085	51558835	1	0.00466845	95
chr1	51897085	51898585	1	0.00173219	181
chr1	52041710	52042585	1	0.00182086	134
chr1	52404835	52405460	1	0.00451648	94
chr1	53401585	53402335	1	0.0526978	69
chr1	53737585	53737960	1	0.0150041	86
chr1	54263460	54264085	-1	0.0168484	-76
chr1	54324835	54326460	1	0.000951248	252
chr1	54622585	54623335	1	0.00323424	169
chr1	55286335	55287460	1	0.0243137	158
chr1	55309835	55309960	1	0.00164261	83
chr1	55443210	55444335	1	0.0196008	126
chr1	55622585	55624085	1	0.000110781	258
chr1	56331335	56332835	1	3.53454e-05	213
chr1	56333085	56333335	1	0.0205129	105
chr1	56456335	56457585	1	0.00218282	125
chr1	56758585	56759710	1	0.00478523	107
chr1	57119335	57120085	1	0.00806861	102
chr1	57204085	57204835	1	0.0432538	91
chr1	57674460	57675585	1	0.0115899	113
chr1	58755085	58755835	1	0.00284134	90
chr1	58812835	58813585	1	0.00321755	100
chr1	58871085	58871835	1	0.000636335	110
chr1	58882585	58883710	1	0.00685059	225
chr1	58883960	58884085	1	0.0500536	143
chr1	59132335	59133085	-1	0.0103776	-91
chr1	59431710	59433085	1	0.00877998	112
chr1	60694585	60695335	1	0.00188163	83
chr1	61215085	61216335	1	0.000688149	109
chr1	61481335	61482085	1	0.0451196	118
chr1	61517460	61517585	1	0.00539483	74
chr1	62495335	62495460	1	0.000369474	99
chr1	64170835	64171710	1	0.0138777	138
chr1	64320085	64320835	1	0.00115918	107
chr1	64421335	64422085	1	0.00108995	107
chr1	64679335	64679460	1	0.0221674	127
chr1	64679960	64680335	1	0.0135218	126
chr1	64846585	64848085	1	0.0143745	86
chr1	65082835	65084335	1	0.00416604	161
chr1	65247835	65248460	1	0.0192116	101
chr1	66181710	66183335	1	0.00086452	180
chr1	66265585	66266210	1	0.0240788	159
chr1	66266460	66267085	1	0.00999599	86
chr1	66335335	66335710	1	0.00101411	67
chr1	66395460	66396710	1	0.000942876	144
chr1	66533335	66533585	1	0.0135604	85
chr1	66564085	66564585	1	0.00484221	107
chr1	67401085	67401210	1	0.0166351	54
chr1	67401585	67401710	1	0.000533981	66
chr1	67521835	67522585	-1	0.00685432	-80
chr1	67625335	67626085	1	0.0625923	80
chr1	68326585	68328835	1	0.00922234	92
chr1	68449835	68450085	1	0.00544957	74
chr1	68881585	68881960	1	0.00896378	68
chr1	68954710	68954960	1	0.00105866	78
chr1	70091085	70091335	1	0.00226497	58
chr1	70156335	70156835	1	0.00182085	92
chr1	70452335	70452460	1	0.00548929	91
chr1	70863835	70864085	1	0.0101257	84
chr1	73164085	73164335	1	0.0143161	89
chr1	74731960	74732835	1	0.0223442	166
chr1	74757960	74758335	1	0.00539219	79
chr1	75672835	75673585	1	0.00783028	82
chr1	75861960	75862335	1	0.0256315	88
chr1	76020085	76020335	1	0.00606126	88
chr1	76152085	76152835	1	0.0159332	77
chr1	76237585	76237960	1	0.000690368	74
chr1	76999210	76999335	1	0.00119829	60
chr1	77423585	77424585	1	0.00159105	110
chr1	77571835	77573335	1	0.00365344	182
chr1	78340710	78341085	1	0.0151842	147
chr1	78472585	78474085	1	0.0025357	164
chr1	78620210	78620460	-1	0.00669364	-132
chr1	78620960	78621085	-1	0.00727465	-43
chr1	78691585	78693085	1	0.00107202	74
chr1	79272710	79273335	1	0.00605417	135
chr1	79323085	79324460	1	0.00470614	209
chr1	81503335	81504085	1	0.0215407	70
chr1	84000210	84001585	1	0.00442837	111
chr1	85189585	85190085	1	0.00293185	65
chr1	85572835	85573710	1	0.00358948	180
chr1	85574210	85574335	1	0.0532651	100
chr1	85581835	85582210	1	0.00452157	72
chr1	85607335	85608085	1	0.00614195	89
chr1	86498460	86498835	1	0.0203274	89
chr1	87147210	87147335	1	0.0131921	43
chr1	87147585	87149085	1	0.00293891	161
chr1	87226085	87226585	1	0.0200418	169
chr1	87227085	87227210	1	0.0388096	153
chr1	88650960	88651585	1	0.00964336	81
chr1	88773835	88775210	1	0.013207	139
chr1	89047335	89047460	1	0.00524832	131
chr1	89274085	89274835	-1	0.00935643	-118
chr1	89727835	89729335	-1	0.00592228	-90
chr1	89889335	89890585	1	0.000484914	112
chr1	89932585	89933335	1	0.00985824	78
chr1	91020835	91021585	1	0.00996757	66
chr1	91121835	91121960	1	0.00294183	91
chr1	91712585	91713335	1	0.00510504	96
chr1	91713585	91713835	1	0.0137405	112
chr1	91796460	91797085	1	0.0199385	77
chr1	91827710	91827835	1	0.00806141	55
chr1	92723335	92724835	1	0.00117429	176
chr1	93509335	93509710	1	0.0138	76
chr1	93566335	93568585	1	0.00223186	153
chr1	93583585	93584335	1	0.00835404	80
chr1	93702710	93702835	1	0.00453178	86
chr1	93779335	93780460	1	0.00624815	218
chr1	94056085	94057585	1	0.00431666	111
chr1	94794960	94795960	1	0.000744685	139
chr1	94864960	94865335	1	0.00338707	71
chr1	95092585	95093335	1	0.00126865	73
chr1	95613960	95614585	1	0.0115189	89
chr1	95850085	95851585	1	0.0142354	190
chr1	95911710	95912085	1	0.0023535	150
chr1	96456585	96457585	1	0.00127707	91
chr1	97055460	97056085	1	0.00466611	95
chr1	98323585	98324085	1	0.00501267	106
chr1	99457585	99458335	1	0.000897622	175
chr1	99672085	99672835	1	0.0045393	97
chr1	100028460	100029085	1	0.00359701	73
chr1	100620960	100621960	1	0.000691052	144
chr1	100836585	100837210	1	0.00892294	118
chr1	100901460	100901960	1	0.00352254	111
chr1	101664085	101664835	1	0.00446136	83
chr1	102234835	102235585	-1	0.000444644	-75
chr1	103770835	103771585	1	0.00526258	102
chr1	104154710	104154835	1	0.0121517	101
chr1	104862085	104863460	1	0.00780472	160
chr1	106049835	106049960	1	0.0111489	90
chr1	106221835	106223835	1	0.00447475	142
chr1	106568335	106569085	1	0.000971262	98
chr1	107164585	107165710	1	0.00716919	116
chr1	108157085	108157585	1	0.000242349	76
chr1	108216835	108217585	1	0.0087721	84
chr1	108502960	108503210	1	0.0030256	180
chr1	108782585	108783085	1	0.00435847	69
chr1	109197460	109197585	1	0.00840846	135
chr1	109251085	109251835	1	0.0241005	78
chr1	109432710	109434335	1	0.00569511	245
chr1	109510960	109511335	1	0.0160444	69
chr1	109762960	109763960	1	0.00701546	123
chr1	109872835	109874335	1	0.000250627	285
chr1	110029710	110030210	1	0.0074617	116
chr1	110030835	110030960	1	0.0404606	54
chr1	110223835	110224585	1	0.00306483	98
chr1	111192210	111193585	1	0.0197506	185
chr1	111213835	111215335	1	0.00357831	121
chr1	111235460	111235585	1	0.00832989	48
chr1	111449210	111449335	1	0.00867738	85
chr1	111508585	111508835	1	0.00885648	86
chr1	111839335	111839585	1	0.000243655	153
chr1	111840460	111840585	1	0.0151557	89
chr1	112543585	112543710	1	0.0408049	98
chr1	112544210	112544460	1	0.0174038	133
chr1	112544710	112544960	1	0.0212495	82
chr1	112619085	112619960	1	0.00814525	163
chr1	112691710	112692835	1	0.000942957	69
chr1	112734835	112736335	1	0.00878089	184
chr1	112848835	112849335	1	0.0175984	93
chr1	113930460	113930960	1	0.00729595	129
chr1	113931585	113931710	1	0.0406605	85
chr1	114045835	114046460	1	0.000997321	67
chr1	114291085	114291335	1	0.0164357	74
chr1	114458335	114458835	1	0.00492264	91
chr1	114716710	114717085	1	0.0105607	67
chr1	115126710	115128085	1	0.00632494	69
chr1	115258085	115258835	1	0.00704449	153
chr1	115259085	115259335	1	0.0230605	49
chr1	115331335	115332085	-1	0.00916817	-72
chr1	115394335	115395085	1	0.0289517	105
chr1	115425835	115426085	1	0.0118267	111
chr1	115545085	115547085	1	0.00465688	146
chr1	116901335	116901710	1	0.000683111	70
chr1	116961085	116961710	1	0.0442914	73
chr1	116989835	116990460	1	0.0014444	162
chr1	117093585	117094210	1	0.0140425	95
chr1	117114835	117115585	1	0.000218543	76
chr1	117147085	117147835	1	0.00351243	80
chr1	117759835	117761335	1	0.00547681	116
chr1	117980335	117980585	1	0.00497375	71
chr1	118085335	118086710	1	0.00334754	91
chr1	118183960	118184210	1	0.00643497	87
chr1	118254835	118255085	1	0.0307876	117
chr1	118573585	118574335	1	0.00204285	77
chr1	119429710	119430085	1	0.0136963	110
chr1	119605460	119606335	1	0.00390579	164
chr1	119894335	119895835	1	0.00476866	119
chr1	119986835	119988085	1	0.00702782	144
chr1	121416835	121417085	1	0.0453449	83
chr1	121417585	121418210	1	0.0191353	86
chr1	125167097	125168597	1	0.010583	101
chr1	143194837	143194962	1	0.00221436	66
chr1	143196212	143196712	1	0.00331461	59
chr1	143197337	143197587	1	0.012688	57
chr1	143199587	143199962	1	0.000294581	37
chr1	143200337	143200962	1	0.000976448	93
chr1	143221837	143221962	1	0.0109535	126
chr1	143222837	143223462	1	0.00244968	188
chr1	143230337	143232462	1	0.00652508	136
chr1	143252837	143253587	1	0.00681619	104
chr1	143253962	143255087	1	0.00754312	136
chr1	143256087	143256587	1	0.0118532	76
chr1	143613587	143614337	1	0.0193433	135
chr1	143662337	143663837	1	0.00239188	136
chr1	144104837	144104962	1	0.0133375	69
chr1	144977785	144977974	1	0.000542178	41
chr1	145706837	145707587	1	0.00086591	100
chr1	145849462	145849837	1	0.0142972	73
chr1	145978837	145979837	1	0.0196188	167
chr1	146933837	146934462	1	0.0199672	50
chr1	147167087	147168462	1	0.00549407	113
chr1	147255712	147256337	1	0.00555509	82
chr1	147368212	147369587	-1	0.000295638	-112
chr1	147551087	147552587	1	0.0075033	82
chr1	147759462	147759587	1	0.00386584	119
chr1	148305587	148306337	1	0.00764075	107
chr1	149895712	149896712	1	0.0126031	88
chr1	149926712	149927587	1	0.00134409	121
chr1	149966837	149968087	1	0.00349687	125
chr1	150294837	150294962	1	0.0030652	89
chr1	150322087	150322212	1	0.0105042	88
chr1	150365087	150365587	1	0.0161563	94
chr1	150556462	150557087	1	0.0160776	93
chr1	150560837	150560962	-1	0.00826503	-37
chr1	150561587	150561837	-1	0.00845504	-144
chr1	150566837	150567587	-1	0.00291563	-70
chr1	150568587	150568837	1	0.0287558	103
chr1	150577712	150578212	1	0.00199289	156
chr1	150764087	150766337	1	0.00417245	210
chr1	150908087	150908837	-1	0.00392587	-70
chr1	151028087	151028837	1	0.00456531	81
chr1	151070837	151071587	1	0.00504775	84
chr1	151199587	151200587	1	0.00872509	96
chr1	151242337	151242587	1	0.00689021	88
chr1	151273337	151274212	1	0.00123196	128
chr1	151281587	151283087	-1	0.00439998	-77
chr1	151536587	151536712	1	0.00202209	88
chr1	151562462	151562587	1	0.0149337	85
chr1	151767587	151768337	1	0.0202938	90
chr1	151773587	151775087	1	0.000938952	139
chr1	151944712	151945962	1	0.00532548	106
chr1	151988087	151988462	1	0.0142086	121
chr1	151988712	151989462	1	0.007939	155
chr1	151992962	151993087	1	0.00781725	72
chr1	152028837	152029337	1	0.00192813	93
chr1	152029962	152030087	1	0.036475	60
chr1	152167712	152168087	1	0.0101906	137
chr1	152311337	152312087	1	0.0199254	78
chr1	152623462	152623712	1	0.0269012	80
chr1	153022837	153023837	1	0.00531371	206
chr1	153298837	153298962	1	0.0158002	65
chr1	153608087	153608587	1	0.0174344	68
chr1	154343337	154343462	1	0.00413564	99
chr1	154584712	154584837	1	0.00128266	78
chr1	154725587	154727087	1	0.00814899	131
chr1	154772087	154772712	1	0.0333466	82
chr1	155004212	155004587	-1	0.000512096	-106
chr1	155192962	155193587	-1	0.00939775	-136
chr1	155208587	155210087	-1	0.006506	-94
chr1	155465587	155467087	1	0.0087109	132
chr1	155648087	155648962	1	0.0104502	307
chr1	155697587	155698337	1	0.0092362	72
chr1	155731837	155731962	1	0.00602164	91
chr1	155961587	155963087	1	0.00891279	115
chr1	156002837	156003587	1	0.021618	88
chr1	156129587	156131087	1	0.00365194	200
chr1	156164087	156164337	1	0.00192595	120
chr1	156164587	156166212	1	0.000610612	171
chr1	156213587	156214337	1	0.0357203	81
chr1	156266212	156266587	1	0.0252827	78
chr1	156727462	156727837	1	0.0155152	78
chr1	156748337	156748962	1	0.00614892	159
chr1	156904337	156904962	1	0.0240801	85
chr1	156939212	156939587	1	0.0016239	76
chr1	156941587	156941712	1	0.00880006	75
chr1	156943462	156943587	1	0.00298781	44
chr1	157182587	157183337	1	0.00397304	95
chr1	157271462	157271712	1	0.0208033	89
chr1	157695837	157697087	1	0.00289825	132
chr1	157770462	157770587	1	0.0164807	94
chr1	158291087	158291587	1	0.00882255	74
chr1	158561962	158563212	1	0.00696404	113
chr1	159016087	159016212	1	0.0088631	196
chr1	159016837	159016962	1	0.00426128	15
chr1	159193462	159194962	1	0.00435689	109
chr1	159597837	159599087	1	0.00225479	198
chr1	159923837	159925337	1	0.00655634	245
chr1	159934337	159934587	1	0.0110258	90
chr1	160123337	160123587	1	0.0392848	62
chr1	160124087	160125962	1	0.00032003	285
chr1	160409087	160410212	-1	0.00666626	-120
chr1	160417087	160417337	1	0.00313554	100
chr1	160547712	160547962	1	0.00368322	248
chr1	160637087	160637587	1	0.00365886	106
chr1	160682837	160683587	1	0.00894575	75
chr1	160884087	160884212	1	0.0105314	86
chr1	161118837	161119212	1	0.0465555	91
chr1	161119462	161120087	1	0.0135117	86
chr1	161201837	161202587	-1	0.000537031	-68
chr1	161249962	161251337	1	0.00114004	111
chr1	161522087	161522837	1	0.0325853	83
chr1	161537087	161537712	1	0.0206499	83
chr1	161571587	161572337	1	4.86878e-05	76
chr1	161765212	161765337	1	0.00714036	66
chr1	163213337	163214337	1	0.00490883	70
chr1	163214712	163214837	1	0.0194946	52
chr1	163998587	164000087	1	0.00166017	170
chr1	164747837	164749087	1	0.00105307	239
chr1	165277087	165277462	1	0.00203332	128
chr1	165398462	165398712	1	0.00811818	85
chr1	165507337	165507587	1	0.0257428	93
chr1	165538337	165538462	1	0.000318634	45
chr1	165540337	165540462	1	0.000798124	42
chr1	165650087	165650212	1	0.0636779	70
chr1	165650712	165651587	1	0.0189472	106
chr1	165737837	165738837	1	0.0244276	125
chr1	165739087	165739337	1	0.0184903	53
chr1	165891212	165891587	1	0.0152594	83
chr1	165895462	165896087	1	0.000520534	124
chr1	166334837	166335587	1	0.0218528	70
chr1	166472087	166472712	1	0.0291061	82
chr1	166988962	166989712	1	0.00380735	143
chr1	166989962	166990337	1	0.0165718	109
chr1	167517087	167518337	1	0.00700814	147
chr1	167564462	167564712	1	0.0354553	94
chr1	167564962	167565462	1	0.0108425	97
chr1	167688587	167690587	1	0.00919109	189
chr1	167911337	167912462	1	0.0118653	91
chr1	168319837	168320087	1	0.0100296	141
chr1	168709462	168710837	1	0.00156126	143
chr1	168920837	168921212	1	0.000265484	86
chr1	169060337	169061087	1	0.0413385	135
chr1	169739212	169740587	1	0.00158309	139
chr1	169769087	169769837	1	0.0236191	89
chr1	170163087	170163587	1	0.00660676	88
chr1	170544712	170545212	1	0.0118582	82
chr1	170593337	170594837	1	0.0323428	107
chr1	170662212	170662337	1	0.00569653	79
chr1	171295837	171296337	1	0.0040302	99
chr1	171296712	171296837	1	0.0261622	91
chr1	171372087	171372462	1	0.000751264	99
chr1	171372712	171373087	1	0.0168521	128
chr1	171485587	171485712	1	0.00127679	85
chr1	171788337	171788462	1	0.0545207	65
chr1	171788712	171789587	1	0.00174893	74
chr1	171794962	171795087	1	0.00775159	80
chr1	171825587	171827087	1	0.000193678	189
chr1	171948962	171949837	1	0.00488796	92
chr1	172775087	172775837	1	0.0421335	78
chr1	173137587	173138087	1	0.00904817	87
chr1	173485337	173486087	1	0.030467	87
chr1	173504837	173506337	1	0.00688726	184
chr1	173691462	173691587	1	0.00581233	106
chr1	173917087	173917337	1	0.0172181	97
chr1	174219712	174220337	1	0.00662103	97
chr1	174848212	174850212	1	0.00205966	131
chr1	174873587	174873837	-1	0.00489475	-77
chr1	175054962	175055837	1	0.00360878	136
chr1	175103087	175103837	1	0.000546227	106
chr1	175269587	175271087	1	0.00177391	120
chr1	175316837	175318712	1	0.00845949	131
chr1	175982337	175984212	1	0.00366227	124
chr1	176789837	176790587	1	0.020899	79
chr1	176858087	176858587	1	0.00359956	85
chr1	177255587	177256087	1	0.0162216	66
chr1	177257087	177257837	1	0.00986804	69
chr1	178094837	178095587	1	0.00801951	112
chr1	178492337	178493837	1	0.00586295	160
chr1	178529837	178530462	1	0.0071975	83
chr1	178684962	178685087	1	0.0126852	106
chr1	178950587	178951337	1	0.0170297	84
chr1	179096837	179098212	1	0.00258231	98
chr1	179109587	179109837	1	0.00875958	90
chr1	179142587	179143962	1	0.000552291	139
chr1	179453087	179453837	1	0.000212699	91
chr1	179709087	179709837	1	0.006725	119
chr1	179710212	179710337	1	0.0452252	120
chr1	179851462	179852837	1	0.000834651	158
chr1	179926337	179927712	1	0.00490428	98
chr1	180122962	180123587	1	0.00867696	79
chr1	180521087	180522587	1	0.0182594	112
chr1	180562587	180563087	1	0.0168718	75
chr1	180584837	180586337	-1	0.014343	-99
chr1	180911087	180911837	1	0.00422035	71
chr1	180947837	180948712	1	0.0117069	198
chr1	180948962	180949212	1	0.0116223	113
chr1	181090087	181091087	1	0.00130548	200
chr1	181126337	181127337	1	0.0180182	88
chr1	181141337	181142087	-1	0.00202305	-113
chr1	181245587	181247087	1	3.3416e-05	81
chr1	181521587	181522087	1	0.0107989	69
chr1	181655087	181655837	1	0.0134618	120
chr1	182552087	182552712	1	0.00502175	74
chr1	182575837	182576087	1	0.00307101	77
chr1	182760587	182761962	1	0.00298002	75
chr1	182950337	182951087	1	0.00205032	77
chr1	182954837	182955712	1	0.00264904	128
chr1	182955962	182956462	1	0.0117293	172
chr1	183139087	183140087	1	0.00810868	131
chr1	183179962	183182087	1	0.00142151	176
chr1	183234587	183235337	1	0.00173567	71
chr1	183546462	183546587	1	0.00518512	41
chr1	183739337	183740712	1	0.00792774	126
chr1	183941837	183941962	1	0.0254863	47
chr1	183942712	183943337	1	0.0177817	103
chr1	183982087	183983087	1	0.00542112	128
chr1	184151962	184153337	1	0.00581465	113
chr1	184192462	184192962	1	0.00772672	95
chr1	184289837	184290712	1	0.00264628	120
chr1	184505837	184506712	1	0.00526702	98
chr1	184781087	184781837	1	0.0175296	93
chr1	184823962	184825337	1	0.000395039	239
chr1	185001587	185002337	1	0.00669801	95
chr1	185483837	185484587	1	0.00227693	89
chr1	185957837	185958337	1	0.019044	94
chr1	186081962	186083087	1	0.00562085	102
chr1	186144587	186146087	1	0.0226671	80
chr1	186674962	186677212	1	0.0101927	90
chr1	187637962	187639212	1	0.00195393	114
chr1	187842587	187844087	1	0.00784459	100
chr1	188706587	188707337	1	0.00684694	111
chr1	188888087	188888837	1	0.00201043	85
chr1	189584087	189584837	1	0.0348689	77
chr1	190678837	190679337	1	0.00357089	161
chr1	190698712	190698837	1	0.000495626	56
chr1	191813087	191813712	1	0.00647489	98
chr1	192476087	192476712	1	0.00478876	89
chr1	192993587	192993712	1	0.00157908	97
chr1	193408212	193408962	1	0.00492886	232
chr1	193409587	193409837	1	0.0141645	114
chr1	193614587	193614837	1	0.00105861	170
chr1	193723337	193724587	1	0.00156708	89
chr1	194297837	194298337	1	0.0132232	66
chr1	194420212	194420837	1	0.0188628	101
chr1	194783087	194783837	1	0.000917976	74
chr1	194872462	194873837	1	0.00365659	135
chr1	195767337	195767837	1	0.0264652	72
chr1	195998837	195999587	1	0.0170956	86
chr1	196062587	196064087	1	0.000905052	91
chr1	198120087	198120212	1	0.0522411	47
chr1	198120462	198121462	1	0.0129032	174
chr1	198121712	198121962	1	0.0590134	79
chr1	198983837	198984587	1	0.0272752	71
chr1	199742837	199743587	1	0.00614472	82
chr1	200197587	200198087	1	0.00207192	83
chr1	200409587	200410337	-1	0.00941732	-74
chr1	200415837	200417087	1	0.000622581	80
chr1	201018587	201019337	1	0.0176407	69
chr1	201072087	201072837	1	0.0101154	108
chr1	201170087	201170837	1	0.027597	68
chr1	201191837	201192587	1	0.0179331	114
chr1	201403087	201405212	1	0.00161867	294
chr1	202012837	202013087	1	0.00756356	83
chr1	202013462	202013837	1	0.0028011	84
chr1	202251587	202251712	-1	0.016711	-62
chr1	202252087	202252337	-1	0.0246217	-66
chr1	202316087	202317587	1	0.00709336	101
chr1	202589087	202589837	1	0.0111658	113
chr1	202964837	202965587	1	0.00680665	88
chr1	203180337	203181587	1	5.43637e-05	193
chr1	203281462	203281837	1	0.000261295	99
chr1	203405087	203405837	1	0.00390033	69
chr1	203648837	203650087	1	0.001195	122
chr1	203770837	203772587	1	0.00133986	176
chr1	203795962	203796587	1	0.0283902	106
chr1	204419962	204420337	1	0.0082587	124
chr1	204434587	204435087	1	0.00986384	190
chr1	204435337	204436212	1	0.00770304	187
chr1	204524962	204525462	1	0.0205219	94
chr1	204709337	204710087	1	0.0153357	72
chr1	205064837	205065587	1	0.0233669	77
chr1	205258337	205258587	1	0.00231746	66
chr1	205292962	205295837	1	0.000209906	256
chr1	205301087	205301837	1	0.0039535	94
chr1	205625837	205626587	-1	0.0075397	-70
chr1	205629712	205629962	1	0.0255114	99
chr1	205630462	205630712	1	0.0183337	98
chr1	205663587	205664087	1	0.00617796	84
chr1	205799337	205799587	1	0.0145375	80
chr1	205811462	205811712	1	0.00217259	64
chr1	205833962	205834087	1	0.00684646	88
chr1	205843087	205843712	1	0.0140477	76
chr1	206319819	206320212	1	0.0168804	81
chr1	206583587	206583962	1	0.0388798	81
chr1	206609087	206609587	1	0.0050605	86
chr1	206633337	206635212	1	0.00784499	244
chr1	206792837	206794337	1	0.00279065	195
chr1	206858837	206860337	1	0.00117385	151
chr1	206889712	206891837	1	0.00249545	244
chr1	206904587	206906087	1	0.0127067	191
chr1	207007337	207007462	1	0.0137676	60
chr1	207020837	207021587	1	0.0181844	77
chr1	207256587	207257087	1	0.00800967	88
chr1	207292587	207293087	1	0.0266247	133
chr1	207293337	207293837	1	0.0100791	68
chr1	207364337	207365087	1	0.00595436	70
chr1	207805337	207805462	1	0.00309984	137
chr1	207821837	207822587	1	0.00982206	111
chr1	207890337	207891587	1	0.00326069	232
chr1	208061087	208061212	1	0.00431015	96
chr1	208154087	208155587	-1	0.00814962	-102
chr1	208412337	208412837	1	0.0241897	80
chr1	208737587	208737962	1	0.00729435	138
chr1	209594962	209595587	1	0.0368349	117
chr1	209658087	209658212	1	0.010032	99
chr1	209658462	209658587	1	0.0124054	69
chr1	209691087	209692337	1	0.00615573	121
chr1	209850587	209852087	1	0.00386963	91
chr1	209884337	209885087	1	0.00482243	96
chr1	209895337	209895587	1	0.00699718	215
chr1	210252587	210252712	1	0.00443993	125
chr1	210310337	210310462	1	0.011483	101
chr1	210311087	210311212	1	0.00803669	60
chr1	210438587	210440087	1	0.00192194	150
chr1	210598087	210598337	1	0.00443533	81
chr1	210618337	210619337	1	0.00634988	108
chr1	210920087	210920212	1	0.00791837	85
chr1	211707587	211708337	1	0.00195713	69
chr1	212487087	212487462	1	0.0173887	77
chr1	212487837	212488462	1	0.00017922	116
chr1	212490712	212492087	-1	0.0018578	-162
chr1	212635712	212635962	-1	0.0206189	-77
chr1	212715837	212715962	1	0.00100606	111
chr1	213070337	213071087	1	0.0233086	89
chr1	213450837	213451087	1	0.00957589	106
chr1	213451337	213451837	1	0.0085894	337
chr1	213599087	213599837	1	0.00519204	83
chr1	214044337	214045337	1	0.0285373	136
chr1	214102337	214102587	1	0.00769415	80
chr1	214202837	214203712	1	0.00243763	86
chr1	214330712	214331087	1	0.0223278	90
chr1	214475087	214476587	1	0.00703762	118
chr1	214638587	214639212	1	0.0197416	80
chr1	214656587	214657337	1	0.00189561	111
chr1	214657587	214657712	1	0.0259575	148
chr1	215393962	215394462	1	0.00972042	125
chr1	216506962	216508337	1	0.000228967	130
chr1	217907337	217908337	1	0.00159475	103
chr1	218463087	218463587	1	0.0280431	93
chr1	218573087	218574462	1	0.00182976	157
chr1	218712212	218713212	1	0.00434003	145
chr1	218713462	218713837	1	0.0106503	71
chr1	219628462	219628587	1	0.00129479	38
chr1	219671337	219671587	1	0.0329539	98
chr1	220015337	220016087	-1	0.00996901	-69
chr1	220301462	220301837	1	0.00421671	102
chr1	220496837	220497587	1	0.00625933	91
chr1	220578587	220580087	1	0.00791068	161
chr1	221002712	221004587	1	0.0015997	211
chr1	221416087	221416587	1	0.000666354	73
chr1	221439587	221440962	1	0.00285231	283
chr1	221713337	221714837	1	0.00574225	122
chr1	221838712	221840837	1	0.00582123	289
chr1	222043587	222043712	1	0.000381569	57
chr1	222044087	222044337	1	0.0148576	101
chr1	222310587	222310712	1	0.00668813	115
chr1	222311712	222311837	1	0.00992996	56
chr1	223020212	223020587	1	0.00116831	89
chr1	223102462	223102712	1	0.0238351	115
chr1	223190087	223190587	1	0.01897	109
chr1	223228337	223228962	1	0.0181998	76
chr1	223233837	223234337	1	0.000317858	50
chr1	223718685	223718810	1	0.00442329	87
chr1	223887435	223887560	1	0.00145648	87
chr1	224726935	224727685	1	0.0136223	129
chr1	225354185	225354935	1	0.0393392	101
chr1	225403685	225404435	1	0.0614541	66
chr1	225423185	225423435	1	0.019226	64
chr1	225508685	225509310	1	0.0110704	86
chr1	225652060	225652310	1	0.000328931	104
chr1	225690935	225692435	1	0.000201604	185
chr1	225700685	225701060	1	0.0175327	110
chr1	225735185	225736685	1	0.010065	99
chr1	226623935	226624685	1	0.0212106	73
chr1	226661935	226662185	1	0.0069988	89
chr1	226664435	226665185	1	0.00739606	90
chr1	226762560	226764685	1	0.00942775	214
chr1	226780935	226781435	1	0.00438818	78
chr1	226815185	226815935	-1	0.0043661	-72
chr1	226897185	226899185	1	0.00154603	240
chr1	227316935	227317060	1	0.00784504	78
chr1	227733935	227734685	1	0.0278209	71
chr1	227886935	227887685	-1	0.00226441	-83
chr1	227903435	227904185	-1	0.0405372	-83
chr1	228086060	228086185	1	0.00633432	104
chr1	228121935	228122060	1	0.0118175	81
chr1	228256685	228257435	1	0.0668485	75
chr1	228337685	228338435	1	0.0100009	82
chr1	228373185	228373435	1	0.00242936	89
chr1	228508685	228509435	1	0.0194207	76
chr1	228534935	228535685	-1	0.00688472	-83
chr1	228751739	228753864	1	0.00120362	146
chr1	229191239	229193114	1	0.0157974	190
chr1	229447614	229449114	1	0.00416552	146
chr1	229464114	229464364	1	0.00485165	68
chr1	229614364	229614614	1	0.0123999	94
chr1	229847864	229848114	1	0.01603	100
chr1	230005489	230005739	1	0.000803968	176
chr1	230022864	230024114	1	0.0255602	127
chr1	230076364	230076489	1	0.0364686	66
chr1	230076864	230078364	1	0.00291072	203
chr1	230104739	230104989	-1	0.0121234	-78
chr1	230112864	230114239	1	0.00428209	163
chr1	230225739	230227489	1	0.00626371	140
chr1	230401239	230401614	1	0.00839986	123
chr1	230680114	230680614	1	0.00767823	116
chr1	230778864	230780239	1	0.00513867	75
chr1	230823989	230824489	1	0.0193229	75
chr1	230855364	230856864	1	0.000430637	111
chr1	230877989	230879239	1	0.00243561	164
chr1	231277614	231278364	1	0.0246406	76
chr1	231492864	231494364	1	0.00230089	148
chr1	231702114	231703614	1	0.00646217	90
chr1	231770614	231770739	1	0.013603	59
chr1	231770989	231771739	1	0.00256037	81
chr1	232160364	232161114	1	0.0168846	84
chr1	232177239	232177364	1	0.0027189	97
chr1	232537739	232539114	1	0.00812155	105
chr1	232728864	232729614	1	0.00153232	69
chr1	232845239	232845364	1	0.00577784	103
chr1	232913364	232914114	1	0.0071402	71
chr1	233108364	233109114	1	0.00952395	111
chr1	233112864	233114364	1	0.00452851	213
chr1	233179239	233180364	1	0.0276886	163
chr1	233362239	233362489	1	0.00258285	88
chr1	233503739	233504364	1	0.0170304	115
chr1	233666364	233666864	1	0.0176144	92
chr1	234024614	234024739	1	0.0115941	90
chr1	234080989	234081114	1	0.00251893	87
chr1	234138864	234141114	1	0.00220328	152
chr1	234369489	234369614	1	0.0136146	61
chr1	234370364	234370614	1	0.01481	88
chr1	234505614	234506364	1	0.00476413	69
chr1	234607614	234608489	1	0.00810728	72
chr1	234959364	234960864	1	0.000947893	92
chr1	234963114	234963364	1	0.00108661	149
chr1	235591614	235592864	1	0.0180871	126
chr1	235740864	235741614	1	0.00332885	67
chr1	235830114	235832364	1	1.27718e-05	101
chr1	235977864	235979239	1	0.0236505	105
chr1	235984614	235985364	1	0.0241071	104
chr1	235998864	236000364	1	0.02691	149
chr1	236016864	236017364	1	0.0103746	85
chr1	236097489	236097614	1	0.00558764	288
chr1	236502114	236502489	1	0.00291195	83
chr1	236558364	236559114	1	0.0114689	95
chr1	236718614	236718864	1	0.0020224	72
chr1	236719489	236719739	1	3.66636e-05	133
chr1	237008364	237009864	1	0.00189337	147
chr1	237591489	237591739	1	0.00544772	109
chr1	237706739	237707364	1	0.0203025	88
chr1	237791364	237791489	1	0.00226024	115
chr1	237933239	237934614	1	0.00108981	138
chr1	238680864	238682364	1	0.00446325	108
chr1	239382114	239382864	1	0.0112751	71
chr1	239675739	239676114	1	0.0119087	115
chr1	239676614	239676864	1	0.000846121	62
chr1	240900864	240901489	1	0.0100252	68
chr1	241542364	241542864	1	0.0106843	156
chr1	241590864	241591614	1	0.0194612	78
chr1	241611989	241613239	1	0.00828292	185
chr1	241741989	241742364	1	0.0259656	83
chr1	242206614	242207364	1	0.000689241	69
chr1	242219364	242220114	1	0.00130512	80
chr1	242225614	242226864	1	0.0182782	137
chr1	243915864	243916739	1	0.00272637	84
chr1	243916989	243917239	1	0.0610434	107
chr1	244162614	244162739	1	0.0657348	43
chr1	244162989	244164489	1	0.00246515	208
chr1	244322364	244323114	1	0.0198079	72
chr1	244435614	244437114	1	0.0030144	219
chr1	244989114	244989864	1	0.0518983	68
chr1	244995364	244995489	1	0.00111046	147
chr1	245090614	245090739	1	0.00544348	56
chr1	245106114	245106489	1	0.00188906	65
chr1	245106739	245108364	1	0.00948558	111
chr1	245124114	245124864	1	0.00338941	77
chr1	245277114	245277864	1	0.00838664	99
chr1	245856364	245857364	1	0.0015058	132
chr1	245986614	245986989	1	0.00740231	111
chr1	245987239	245987489	1	0.0236724	150
chr1	246528864	246529239	1	0.00908153	69
chr1	246606614	246608364	1	0.00102887	170
chr1	246633864	246635364	1	0.00300026	196
chr1	246704489	246705989	1	0.00146282	231
chr1	246794364	246795739	1	0.00298685	223
chr1	247015739	247016114	1	0.018058	83
chr1	247217864	247218364	-1	0.00411759	-154
chr1	248597489	248597739	1	0.00348473	114
chr1	248820864	248821489	1	0.0411738	106
chr1	248829614	248829864	1	0.00307055	60
chr10	334750	335500	1	0.0159421	125
chr10	386500	388000	1	0.00818022	175
chr10	666000	666125	1	0.00720919	69
chr10	717250	718750	1	0.0372419	136
chr10	770875	773250	1	0.0014886	237
chr10	825375	826000	1	0.0168603	89
chr10	944500	945250	-1	0.0187652	-70
chr10	973125	975250	1	0.003084	262
chr10	1035250	1036750	1	0.000104752	201
chr10	1096000	1096750	1	0.00287365	108
chr10	1101250	1103000	1	0.00688723	479
chr10	1279750	1280250	1	0.0128393	71
chr10	1358750	1358875	1	0.00870461	141
chr10	1366375	1367500	1	0.0105573	121
chr10	1454625	1456000	1	0.0036353	90
chr10	1498000	1501000	1	0.00472903	111
chr10	1746250	1748125	1	0.00725258	366
chr10	1946125	1947125	1	0.00881765	244
chr10	1954000	1954125	1	0.0549198	75
chr10	1954375	1954750	1	0.0313862	75
chr10	2207875	2208500	1	0.00221344	124
chr10	2208875	2209000	1	0.0442795	75
chr10	2213500	2215750	1	0.00878515	224
chr10	2501500	2502250	1	0.0066924	83
chr10	2867250	2867375	1	0.00216636	74
chr10	2905000	2905750	1	0.0126072	71
chr10	3016750	3017500	1	0.000319268	75
chr10	3076000	3076750	1	0.0055869	79
chr10	3107125	3107375	1	0.00688042	120
chr10	3112750	3113500	1	5.41954e-05	76
chr10	3320750	3322000	1	0.0232032	122
chr10	3343750	3344500	-1	0.0149672	-82
chr10	3373000	3374500	1	0.000502665	211
chr10	3556125	3557250	1	0.00847757	257
chr10	3763125	3763250	1	0.0208903	119
chr10	3763625	3763750	1	0.0209384	72
chr10	3766000	3767500	1	0.00325069	161
chr10	3853250	3853500	1	0.00271805	107
chr10	3873375	3873875	1	0.00347295	101
chr10	3887750	3888250	1	0.00694612	125
chr10	3893625	3893750	1	0.00551619	44
chr10	3894000	3894125	1	0.0124063	123
chr10	3906250	3907000	1	0.0188098	116
chr10	3926500	3927875	1	0.0045384	191
chr10	4102750	4104125	1	0.000795532	153
chr10	4181500	4182250	1	0.0204862	71
chr10	4221250	4221875	1	0.0185723	93
chr10	4344250	4345750	1	0.00147186	99
chr10	4352875	4355500	1	0.01211	161
chr10	4407250	4408750	1	0.0020185	178
chr10	4476250	4477000	1	0.00164122	71
chr10	4541500	4542000	1	0.0371641	107
chr10	4847625	4848250	1	0.0207617	74
chr10	4941375	4941625	1	0.00533905	80
chr10	5158750	5159875	1	0.0262051	88
chr10	5160250	5161000	1	0.0320452	82
chr10	5552750	5554000	1	0.00697004	103
chr10	5742250	5743000	1	0.0159238	67
chr10	5917375	5917875	1	0.00168075	94
chr10	5958250	5959750	1	0.00765894	129
chr10	6007750	6008000	1	0.0149369	95
chr10	6008250	6008500	1	0.0635271	84
chr10	6120750	6122000	1	0.0162785	210
chr10	6136875	6137250	1	0.0229403	86
chr10	6190750	6191500	-1	0.00685344	-70
chr10	6299750	6300125	1	0.0063822	90
chr10	6400875	6402250	1	0.00161237	120
chr10	6482500	6483875	1	0.00574401	208
chr10	6538250	6538375	1	0.00770566	102
chr10	6649250	6650500	1	0.00312161	134
chr10	6722250	6722375	1	0.00204778	168
chr10	7102000	7102750	1	0.00676816	83
chr10	7111000	7112500	1	0.00514193	204
chr10	7355125	7355250	1	0.014324	66
chr10	7466000	7466125	1	0.00735096	84
chr10	7466625	7467000	1	0.00682766	105
chr10	7690875	7692250	1	0.00786675	132
chr10	7722000	7722250	1	0.0157088	63
chr10	7779250	7780000	1	0.012246	69
chr10	8712250	8713750	1	0.00781304	77
chr10	10325875	10326000	1	0.00667531	133
chr10	10588750	10591000	1	0.00303592	182
chr10	10891000	10891375	1	0.0479549	70
chr10	10891625	10891750	1	0.0509937	83
chr10	10922875	10923250	1	0.00225705	108
chr10	10923875	10924000	1	0.00242387	62
chr10	11012500	11012625	1	0.00839345	62
chr10	11012875	11013625	1	0.0104119	75
chr10	11057000	11057125	1	0.000763553	87
chr10	11057375	11057500	1	0.020412	90
chr10	11207500	11208250	1	0.00294261	96
chr10	11659875	11660000	1	0.00783399	71
chr10	11660250	11661125	1	0.0136252	81
chr10	11875125	11875750	-1	0.0371593	-80
chr10	11898250	11899375	1	0.00261494	185
chr10	12081375	12082000	1	0.00255235	82
chr10	12088000	12088250	1	0.0754519	80
chr10	12088500	12089500	1	0.00131766	167
chr10	12217750	12218125	1	0.0176934	97
chr10	12527000	12527500	1	0.00818198	77
chr10	13118500	13119250	1	0.00266825	86
chr10	13157500	13158250	1	0.0245279	70
chr10	13633875	13634500	1	0.0105178	78
chr10	13654375	13654500	1	0.0139759	71
chr10	13683625	13683750	1	0.0328961	95
chr10	13684375	13685125	1	0.00372028	126
chr10	13706500	13707250	1	0.00188288	97
chr10	13758250	13758625	1	0.0304375	76
chr10	13798750	13799500	1	0.0194188	73
chr10	14009750	14012000	1	0.00102886	234
chr10	14048625	14050375	1	0.000581585	235
chr10	14088625	14089375	1	0.00430445	157
chr10	14089625	14089750	1	0.00479399	127
chr10	14491125	14491250	1	0.00232153	194
chr10	14535375	14537500	1	0.00136926	177
chr10	14647875	14649875	1	0.00151564	158
chr10	14782000	14782375	1	0.00500638	77
chr10	15200375	15201875	1	0.000205753	231
chr10	15214875	15215500	1	0.00856791	70
chr10	15446000	15446250	1	0.0191485	58
chr10	16027625	16028500	1	0.00400348	87
chr10	16498875	16499125	1	0.00629406	159
chr10	16570000	16571375	-1	0.0126648	-85
chr10	16585750	16586500	-1	0.0116916	-70
chr10	16947250	16948750	1	0.000776199	95
chr10	17062500	17062750	1	0.015391	143
chr10	17075500	17075625	1	0.00670167	87
chr10	17122750	17123500	1	0.0185358	92
chr10	17339500	17340250	1	0.00309193	176
chr10	17345625	17346500	-1	0.0025242	-128
chr10	17346750	17347000	-1	0.0162553	-50
chr10	17527375	17528500	1	0.00340632	251
chr10	17665750	17666500	1	0.0006137	111
chr10	17809000	17809750	1	0.0117576	71
chr10	17833750	17835250	1	0.00624849	132
chr10	17962000	17962750	1	0.020198	104
chr10	18246625	18247250	1	0.00212287	105
chr10	18519250	18519625	1	0.00688761	77
chr10	18523125	18523750	1	0.0148757	80
chr10	18791875	18792875	1	0.00230959	311
chr10	18836500	18837250	1	0.00113213	70
chr10	18918375	18919000	1	0.00664261	96
chr10	19093750	19094500	1	0.0261193	88
chr10	19874500	19875125	1	0.00245179	130
chr10	19918125	19919500	1	0.00751423	85
chr10	20004500	20004625	1	0.00169805	103
chr10	20807625	20808125	1	0.0156921	85
chr10	21817750	21818500	1	0.014963	71
chr10	23273500	23275000	1	0.00432656	242
chr10	23375750	23375875	1	0.00602581	155
chr10	23424250	23424750	1	1.54875e-05	71
chr10	23434000	23434750	1	0.00100087	115
chr10	23512500	23513375	1	0.00435886	225
chr10	23579500	23580250	1	0.00741206	82
chr10	24209500	24209875	1	0.0109397	163
chr10	24210375	24210750	1	0.0302352	126
chr10	24427000	24427750	1	0.0137792	82
chr10	24428875	24429250	1	0.0240663	102
chr10	24531875	24532000	1	0.00396125	129
chr10	24554375	24554875	1	0.00958977	194
chr10	24558000	24559375	1	0.00562874	223
chr10	24889000	24889750	1	0.000734236	97
chr10	24941750	24942250	1	0.00582771	101
chr10	25783750	25784000	1	0.0155894	62
chr10	25867000	25868500	1	0.0260905	89
chr10	25981750	25982500	1	0.0040701	83
chr10	26487250	26488750	1	0.0084975	161
chr10	26896750	26896875	1	0.00200191	43
chr10	27251250	27251875	1	0.0201461	122
chr10	28762750	28762875	1	0.0224402	51
chr10	28763500	28764500	1	0.00109873	207
chr10	28983875	28984000	1	0.00790058	121
chr10	29345750	29345875	1	0.014198	97
chr10	29392500	29394250	1	0.00181056	298
chr10	29399500	29400250	1	0.00985191	79
chr10	29501500	29502250	1	0.0139315	105
chr10	29658375	29659000	1	0.00455076	134
chr10	29821000	29822250	1	0.00245693	95
chr10	29840500	29842000	1	0.0134726	105
chr10	30368500	30369250	1	0.0129883	69
chr10	30504250	30505000	1	0.0170515	82
chr10	30580000	30581500	1	0.00334553	148
chr10	30630625	30631750	1	0.0171728	116
chr10	30681750	30683500	1	0.000608917	138
chr10	30691000	30691750	1	0.00734719	110
chr10	30795250	30795875	1	0.0252374	65
chr10	30977000	30977500	1	0.00543902	170
chr10	30977750	30978250	1	0.00575408	99
chr10	31195250	31195875	1	0.00812365	85
chr10	31260250	31261000	1	0.00754484	111
chr10	31866500	31867750	1	0.012994	102
chr10	31940500	31941250	1	0.00275285	134
chr10	33134375	33134500	1	0.00401185	152
chr10	33263500	33264125	1	0.0131924	125
chr10	33285875	33286000	1	0.00845074	92
chr10	33381250	33381375	1	0.00740803	90
chr10	33470500	33471875	1	0.00397469	84
chr10	33571875	33572375	1	0.00551123	138
chr10	33706000	33707375	1	0.00312491	216
chr10	33783250	33784000	1	0.018103	83
chr10	33880000	33880750	1	0.0147415	92
chr10	33912500	33913750	1	0.00672636	122
chr10	33926500	33927875	1	0.00115505	109
chr10	35092750	35093250	1	0.031349	104
chr10	35296750	35297250	1	0.0263193	82
chr10	35299750	35300500	1	0.00619749	141
chr10	35332000	35332250	1	0.0349576	66
chr10	35332500	35332750	1	0.0342469	70
chr10	35605750	35607000	1	0.0180474	97
chr10	35657125	35657875	1	0.0259588	92
chr10	35749000	35749375	1	0.0223644	94
chr10	35910250	35911000	1	0.00280555	81
chr10	36023250	36023500	1	0.010793	102
chr10	36024875	36025000	1	0.00114967	106
chr10	38449750	38450500	1	0.00676464	96
chr10	38718088	38718838	1	0.0206922	96
chr10	38982019	38982644	1	0.0115371	85
chr10	39236136	39237011	1	0.0189055	106
chr10	39237511	39238955	1	0.00534146	45
chr10	41870146	41870396	1	0.00470849	129
chr10	41870896	41871271	1	0.00153747	77
chr10	41876646	41878146	1	0.000734724	127
chr10	41878521	41879021	1	0.00759837	126
chr10	41879271	41880021	1	0.000945793	127
chr10	41880521	41880646	1	0.0160011	78
chr10	41881396	41881646	1	0.0102875	98
chr10	41884771	41886146	1	0.00171136	96
chr10	41886646	41887021	1	0.00498088	121
chr10	41888396	41888521	1	0.0317718	100
chr10	41888771	41889146	1	0.00526925	135
chr10	41889646	41890021	1	2.82823e-05	77
chr10	41893271	41893896	1	0.0264702	139
chr10	41895021	41896146	1	0.00218243	85
chr10	41896396	41896646	1	0.0286057	80
chr10	41897021	41897146	1	0.0460131	84
chr10	41897521	41899771	1	0.000677498	90
chr10	41901646	41902146	1	0.00118603	74
chr10	41904271	41904771	1	0.00720311	91
chr10	41909146	41909646	1	0.00119324	115
chr10	41912646	41912771	1	0.00849896	135
chr10	41913021	41913146	1	0.00357125	114
chr10	41915396	41916197	1	0.00298201	58
chr10	42216910	42218035	1	0.00835673	72
chr10	42593910	42595410	1	0.00122775	141
chr10	42933285	42933910	-1	0.00813171	-106
chr10	43305160	43306660	1	2.87323e-05	203
chr10	43534035	43534160	1	0.000283231	116
chr10	43853785	43854410	1	0.0137448	136
chr10	44004910	44005660	1	0.0356819	84
chr10	44007535	44008285	1	0.00234771	173
chr10	44169160	44169910	1	0.0105335	75
chr10	44261410	44261535	1	0.0210491	67
chr10	44261785	44262285	1	0.036531	134
chr10	44262535	44262910	1	0.0427962	99
chr10	44300535	44301160	1	0.00381088	92
chr10	44576535	44577910	1	0.0134564	168
chr10	44610160	44610785	1	0.0077896	84
chr10	44865160	44866660	-1	0.0101422	-88
chr10	45622785	45623410	1	0.000895256	91
chr10	46375660	46376410	1	0.0087171	75
chr10	46522910	46524160	-1	0.00492212	-98
chr10	46548160	46548285	-1	0.0121806	-92
chr10	46810660	46810785	1	0.0142808	52
chr10	46811035	46811410	1	0.0430518	82
chr10	48279118	48280493	1	0.00371947	159
chr10	48626368	48627118	1	0.0133854	73
chr10	48774368	48774493	1	0.0064781	79
chr10	48820993	48821243	1	0.0243566	74
chr10	48897118	48897868	1	0.0075838	90
chr10	49031368	49031868	1	0.00282742	86
chr10	49139368	49141493	1	0.00187871	223
chr10	49399618	49401118	1	0.00160618	265
chr10	49474618	49475368	1	0.0266068	74
chr10	49552368	49552618	1	0.0244568	87
chr10	49754368	49755118	1	0.0141367	69
chr10	50017618	50018368	1	0.0191757	83
chr10	52198618	52200118	1	0.00126767	119
chr10	52413368	52413868	1	0.0138543	66
chr10	52500118	52500743	1	0.00272519	80
chr10	52609618	52610368	1	0.0189868	79
chr10	56537368	56537868	1	0.00129739	140
chr10	57009118	57010618	1	0.00651297	163
chr10	57837993	57839118	1	0.0120891	106
chr10	57847243	57847493	1	0.00590872	226
chr10	57991743	57991868	1	0.0140566	114
chr10	59032868	59034118	1	0.0249346	117
chr10	59812493	59814118	1	0.00112935	189
chr10	60413368	60413993	1	0.00672961	109
chr10	60414243	60414868	1	0.022394	90
chr10	60555118	60556618	1	0.00192275	80
chr10	60739618	60740368	1	0.00769665	91
chr10	60784618	60784868	1	0.00682915	108
chr10	60888368	60889243	1	0.00135186	234
chr10	61465118	61465368	1	0.0117702	133
chr10	61548243	61548868	1	0.00637971	84
chr10	62050868	62052118	1	0.000141338	104
chr10	62157243	62158618	1	0.000359435	160
chr10	62432368	62433368	1	0.00283937	92
chr10	62735868	62735993	1	0.00019357	101
chr10	62779118	62780368	1	0.0102187	159
chr10	62868118	62869493	1	0.00127816	98
chr10	63173368	63174118	-1	0.00842849	-97
chr10	64103993	64104743	1	0.0208206	121
chr10	64570618	64570743	1	0.0145376	70
chr10	68152868	68154743	1	0.00648584	192
chr10	68525368	68527493	1	0.0167038	124
chr10	68554868	68556118	1	0.0173844	78
chr10	68754118	68754368	1	0.0146927	70
chr10	69090743	69090868	1	0.0158669	63
chr10	69317368	69317993	-1	1.55652e-05	-85
chr10	69349493	69350118	1	0.00535593	116
chr10	69978868	69979618	1	0.000106511	88
chr10	70056868	70058368	1	0.00623818	157
chr10	70113868	70114618	1	0.0164043	99
chr10	70132618	70133118	-1	0.005617	-77
chr10	70232868	70232993	1	0.012478	83
chr10	70551868	70553118	1	0.00935128	96
chr10	70701868	70702618	1	0.00149209	142
chr10	70725118	70726618	1	0.00219572	113
chr10	70875118	70877368	1	0.0015755	213
chr10	71009368	71010118	-1	0.0184764	-82
chr10	71073868	71073993	1	0.0161342	158
chr10	71292118	71293868	1	0.00169842	278
chr10	71644243	71644368	-1	0.00205984	-77
chr10	71674993	71675118	1	0.00799752	84
chr10	71709118	71710243	1	0.00967231	121
chr10	71820243	71820868	1	0.0108116	84
chr10	71860743	71860868	1	0.00876456	94
chr10	71962118	71963493	1	0.00114827	189
chr10	72096868	72098368	1	0.00471721	92
chr10	72272368	72272993	1	0.00939761	76
chr10	72319618	72320243	1	0.0062293	75
chr10	72792493	72792868	1	0.00408381	105
chr10	73898868	73898993	1	0.0157379	79
chr10	73908493	73909243	1	0.00305164	236
chr10	74240368	74241118	1	0.000394543	70
chr10	75048868	75049618	1	0.00633856	109
chr10	75210118	75211368	1	0.00237274	84
chr10	76000243	76002118	1	0.00442478	170
chr10	76049618	76050868	1	0.00145834	114
chr10	76218118	76218493	1	0.00386301	78
chr10	76431868	76432618	1	4.08433e-05	86
chr10	76508493	76510618	1	0.00466657	192
chr10	77139868	77140618	1	0.00729361	68
chr10	77164243	77164618	1	0.0338546	55
chr10	77291618	77291993	1	0.0046041	134
chr10	77376118	77376368	1	0.00470558	80
chr10	77554618	77554743	1	0.014086	50
chr10	77658868	77658993	1	0.0822487	113
chr10	77659243	77660368	1	0.000755585	96
chr10	78002618	78002993	1	0.0237453	69
chr10	78052993	78053993	1	0.00183217	143
chr10	78148743	78149368	1	0.030719	103
chr10	78457868	78458993	1	0.00863915	93
chr10	78659368	78660118	1	0.0154553	82
chr10	78774243	78776118	1	0.000575277	218
chr10	79222618	79224368	1	0.00143159	111
chr10	79331368	79332868	1	0.0106543	149
chr10	79509868	79511118	1	0.00498136	78
chr10	80162368	80163118	1	0.0331472	74
chr10	80165493	80166493	1	0.00320623	168
chr10	80272993	80273493	1	0.000481057	89
chr10	80520868	80521618	1	0.0432117	71
chr10	81215493	81216243	1	0.00714809	75
chr10	81279868	81280618	1	0.0111669	99
chr10	81498243	81499118	1	0.0063824	112
chr10	81600118	81601493	1	0.00353243	95
chr10	81847618	81848368	1	0.00381537	74
chr10	82452868	82453243	1	0.00249705	79
chr10	82453493	82453618	1	0.00236709	48
chr10	83523618	83523868	1	0.00121965	108
chr10	84139618	84140368	1	0.0138498	117
chr10	84313368	84313743	1	0.0130259	107
chr10	84314118	84314243	1	0.00791525	68
chr10	84933118	84933368	1	0.00353942	88
chr10	84986743	84987118	1	0.00445725	84
chr10	85545868	85546118	1	0.0498049	74
chr10	85546368	85547368	1	0.0231295	116
chr10	85557993	85558618	1	0.024555	91
chr10	85902618	85902868	1	0.000191436	108
chr10	87382618	87383243	1	0.0329007	67
chr10	87635618	87636118	1	0.041925	95
chr10	87842493	87842618	1	0.00496979	57
chr10	87975118	87977118	1	0.0019685	149
chr10	88047118	88047243	-1	0.0595895	-96
chr10	88047493	88047868	-1	0.0401419	-81
chr10	88118368	88119868	1	0.0125679	152
chr10	88820618	88821118	1	0.0109019	62
chr10	88999618	89000368	1	0.0074517	96
chr10	89295868	89296618	-1	0.00914059	-80
chr10	89307993	89309993	1	0.00658369	127
chr10	89327368	89328118	-1	0.00925731	-86
chr10	89331868	89332618	-1	0.0109804	-83
chr10	89347743	89349118	1	0.00292143	112
chr10	89391868	89392243	-1	0.00347201	-115
chr10	89413618	89415118	-1	0.0167009	-136
chr10	90920368	90921868	1	0.00195403	190
chr10	91095868	91095993	1	0.0224609	109
chr10	91096868	91097118	1	0.0102418	121
chr10	91601993	91602118	1	0.00489978	85
chr10	93288118	93289368	1	0.00204636	184
chr10	93313618	93313868	1	0.00973298	105
chr10	93437368	93438118	1	0.035898	109
chr10	93876243	93876743	1	0.00389319	82
chr10	94111618	94112243	1	0.000567115	108
chr10	94676118	94676368	1	0.00911617	77
chr10	94990868	94992868	1	0.000106456	309
chr10	95393493	95394618	1	0.000229165	221
chr10	95609368	95610118	1	0.0136436	84
chr10	95692618	95693368	1	0.00316676	70
chr10	95799868	95801368	1	0.0111497	96
chr10	95935118	95935243	1	0.00574649	99
chr10	96129743	96129868	1	0.0169015	69
chr10	96322868	96323118	1	0.0141902	88
chr10	96466618	96467243	1	0.00085227	129
chr10	96645993	96646493	1	0.00782203	91
chr10	96646868	96647618	1	0.00756197	178
chr10	96673618	96674368	-1	0.00426033	-138
chr10	96747118	96747243	1	0.00132719	87
chr10	97040118	97040368	1	0.0079777	98
chr10	97069618	97071118	1	0.00411883	330
chr10	97365993	97366618	1	0.00537019	80
chr10	97687743	97687868	1	0.00875646	78
chr10	97881743	97881868	1	0.0153961	108
chr10	97882118	97883493	1	0.00704738	246
chr10	97902868	97904243	1	0.0032518	106
chr10	98018368	98018868	1	0.0110989	90
chr10	98248618	98249243	1	0.016213	77
chr10	98383743	98383993	1	0.00523087	148
chr10	98390368	98391118	1	0.0075303	70
chr10	98419618	98420368	1	0.000286772	75
chr10	99087118	99088368	1	0.0118311	246
chr10	99279118	99279493	1	0.0186384	97
chr10	99849118	99849868	1	0.0381202	121
chr10	99850118	99851368	1	0.00900421	154
chr10	99894868	99895618	1	0.0213247	78
chr10	99905743	99907618	1	0.000318541	208
chr10	100394368	100395868	1	0.0143113	92
chr10	100977868	100978618	1	0.00371925	75
chr10	101211868	101212618	1	0.0262373	104
chr10	101237368	101238118	1	0.00828017	109
chr10	101587743	101587868	1	0.00314529	118
chr10	101770618	101771368	1	0.00135798	127
chr10	101939368	101940118	1	0.000557228	69
chr10	102132743	102133368	1	0.00552133	94
chr10	102138493	102139618	1	0.00761834	88
chr10	102151743	102153118	1	0.00609702	205
chr10	102192868	102193618	-1	0.0127265	-137
chr10	102197743	102198618	1	0.0009035	121
chr10	102367868	102368493	1	0.0021896	168
chr10	102393868	102395493	1	0.0025707	217
chr10	102395743	102396118	1	0.045006	147
chr10	102603493	102604493	1	0.00784411	127
chr10	102775618	102776368	-1	0.00281163	-73
chr10	103260118	103261618	1	0.00417403	105
chr10	103677493	103678493	1	0.00838109	114
chr10	103812118	103812868	-1	0.0496189	-68
chr10	103834618	103834868	1	0.0420487	103
chr10	103835118	103835368	1	0.0447147	117
chr10	104037493	104037868	1	0.0248339	117
chr10	104120368	104121118	1	0.0341447	123
chr10	104809118	104809743	1	0.0293581	118
chr10	104810243	104810368	1	0.0425831	79
chr10	105585618	105585868	1	0.0102318	107
chr10	105677493	105677743	1	0.0270367	135
chr10	106424368	106425118	1	0.000950306	80
chr10	106560243	106561618	1	0.000611985	92
chr10	106651618	106653493	1	0.00980804	250
chr10	107187243	107187868	1	0.00504215	108
chr10	107355368	107355868	1	0.00580774	129
chr10	108480118	108480493	1	0.0577348	114
chr10	108480743	108480868	1	0.0558497	106
chr10	108783118	108783243	1	0.00528799	104
chr10	108783868	108783993	1	0.00253638	100
chr10	108978868	108979493	1	0.0311354	73
chr10	109205493	109205618	1	0.00659041	78
chr10	109981618	109981743	1	0.00554446	65
chr10	110409118	110411243	1	0.00150852	140
chr10	110414868	110415368	1	0.00363964	177
chr10	110529993	110530618	1	0.0115462	229
chr10	110774368	110775118	1	0.00884384	125
chr10	111441118	111441618	1	0.0301963	66
chr10	111441993	111442618	1	0.0278623	71
chr10	112125118	112125618	1	0.0282433	65
chr10	112302118	112302868	1	0.0133955	76
chr10	112389118	112389868	1	0.0147668	109
chr10	112989118	112989868	1	0.0270101	133
chr10	113131618	113131868	1	0.0151624	110
chr10	113242618	113244118	1	0.0071745	144
chr10	113252368	113252743	1	0.00679576	49
chr10	113721368	113721743	1	0.0336969	91
chr10	113772868	113773618	1	0.00812019	146
chr10	114025618	114027118	1	0.00160717	186
chr10	114086368	114087868	1	0.0401512	97
chr10	114352868	114354118	1	0.0154448	116
chr10	114519993	114520868	1	0.0219486	160
chr10	114547618	114548743	1	0.0330111	92
chr10	115018368	115019868	1	0.00185958	158
chr10	115535618	115535743	1	0.00636645	74
chr10	115827118	115827868	1	0.032071	83
chr10	116071618	116072368	-1	0.0125904	-83
chr10	116107618	116108993	1	0.00358529	135
chr10	116667243	116667868	1	0.050493	90
chr10	117235618	117235743	1	0.0374952	116
chr10	117235993	117236993	1	0.0221131	150
chr10	117243868	117245118	1	0.000176431	132
chr10	117266368	117266493	1	0.000359925	84
chr10	117441118	117441993	1	0.0206888	105
chr10	117442243	117442618	1	0.0339127	136
chr10	117461493	117461868	1	0.014893	97
chr10	117531368	117531493	1	0.000993567	89
chr10	117684243	117684868	-1	0.0168897	-74
chr10	117928618	117928868	1	0.0027599	94
chr10	117979618	117981118	1	0.00142936	131
chr10	118002243	118002618	1	0.0344561	100
chr10	118526368	118527743	1	0.0105388	160
chr10	118624618	118624993	1	0.00543808	75
chr10	118625243	118625368	1	0.0341738	62
chr10	119036368	119036743	1	0.0207728	68
chr10	119036993	119037118	1	0.0282694	60
chr10	119049868	119050618	1	0.00623967	71
chr10	119161618	119161868	1	0.00534401	78
chr10	119162118	119162243	1	0.0147872	98
chr10	119305618	119306368	1	0.00530833	90
chr10	119334993	119335118	1	0.00474866	87
chr10	119409243	119409868	-1	0.0192215	-77
chr10	119421118	119421493	1	0.04594	68
chr10	119421743	119421868	1	0.0496232	70
chr10	119617618	119618368	1	0.00735841	85
chr10	119842618	119843368	1	0.0241888	85
chr10	119940118	119941493	1	5.02628e-05	138
chr10	120318993	120319618	1	0.00326941	73
chr10	120606868	120606993	1	0.0482416	51
chr10	120607368	120608368	1	0.00861604	99
chr10	121405993	121407743	1	0.000390897	226
chr10	121910368	121911243	1	0.00861296	82
chr10	121911743	121911868	1	0.0283519	59
chr10	121926868	121927618	1	0.014119	67
chr10	122019493	122019868	1	0.0125831	133
chr10	122020118	122020243	1	0.0065575	110
chr10	122087868	122088368	1	0.00854975	160
chr10	122201368	122203493	1	0.00206339	190
chr10	122421618	122421868	1	0.00157857	62
chr10	122490618	122490868	1	0.00123416	46
chr10	122509743	122510368	1	0.0237553	112
chr10	122557618	122559118	1	0.00406831	160
chr10	122575118	122575493	1	0.0115102	120
chr10	122639368	122640618	1	0.00225504	148
chr10	122780368	122781118	1	0.00200469	122
chr10	123458368	123459118	-1	0.0161429	-69
chr10	123656493	123657493	1	0.016912	79
chr10	123771118	123771868	1	0.0139877	82
chr10	124008868	124010368	1	0.00147645	123
chr10	124196627	124198002	1	0.020594	86
chr10	124341627	124342752	1	0.00979691	83
chr10	124525127	124526502	1	0.0157163	184
chr10	124591752	124592377	1	0.031989	71
chr10	124603627	124603752	-1	0.0011382	-79
chr10	124693752	124694502	1	0.0166588	70
chr10	124713877	124714002	1	0.0100833	78
chr10	124983252	124983877	1	0.00409364	109
chr10	124997502	124998252	1	0.0246852	78
chr10	125012127	125012252	1	0.0343897	96
chr10	125012502	125014127	1	0.00264105	299
chr10	125062002	125062752	-1	0.00486542	-87
chr10	125151252	125152502	-1	0.0142613	-87
chr10	125231002	125232877	1	0.00208865	175
chr10	125281002	125281127	1	0.0121553	75
chr10	125648252	125648502	1	0.00678062	80
chr10	125778502	125778877	-1	0.0248746	-79
chr10	125795752	125797502	1	0.00148022	219
chr10	125972502	125972752	1	0.00809998	60
chr10	125973252	125973877	1	0.00567431	117
chr10	125998002	125998752	1	0.0183394	78
chr10	126038502	126039252	1	0.0149703	92
chr10	126134377	126136002	1	0.000645612	132
chr10	126199002	126199752	1	0.0110874	78
chr10	126246502	126248502	1	0.000609333	338
chr10	126421502	126421627	1	0.00814603	115
chr10	126755502	126756252	1	0.0107522	163
chr10	126844252	126845502	1	0.000363615	171
chr10	126922752	126923502	-1	0.0383018	-68
chr10	126987252	126987627	1	0.0107086	80
chr10	126987877	126988002	1	0.0262049	56
chr10	127085627	127087752	1	0.00034758	114
chr10	127733127	127733252	1	0.00423282	101
chr10	127834002	127834752	1	0.0158508	105
chr10	127991002	127992002	1	0.00607614	114
chr10	128279002	128279252	1	0.0223216	120
chr10	128323002	128323752	1	0.0129868	69
chr10	128625252	128625877	1	0.0393744	88
chr10	128773002	128773752	1	0.0104898	92
chr10	128927127	128928252	1	0.000646512	113
chr10	129004252	129004377	-1	0.00106864	-77
chr10	129096252	129097002	1	0.00262147	130
chr10	129232752	129233252	-1	0.01665	-64
chr10	129569627	129571002	1	0.000736907	153
chr10	129613002	129613752	1	0.0207801	83
chr10	129622002	129622752	1	0.00181584	99
chr10	129688877	129691002	1	0.000120089	206
chr10	129962502	129963252	1	0.0120331	119
chr10	130108002	130108752	1	0.0156357	80
chr10	130117002	130118502	1	0.00154416	200
chr10	130213752	130214502	1	0.0591937	99
chr10	130432002	130432252	1	0.00889876	70
chr10	130498002	130498127	1	0.00632514	90
chr10	130718627	130719752	1	0.00601456	200
chr10	130720377	130720502	1	0.0160916	70
chr10	130884252	130885002	1	0.00830712	123
chr10	130889877	130890127	1	0.0240456	75
chr10	130926502	130927502	1	0.0238141	153
chr10	130960752	130961502	1	0.0245823	82
chr10	131049252	131052002	1	0.00316768	311
chr10	131080002	131080252	1	0.0350465	90
chr10	131080502	131081502	1	0.00838674	167
chr10	131129502	131130877	1	0.0177417	145
chr10	131156502	131157252	1	0.0104018	69
chr10	131158877	131159877	1	0.0234506	89
chr10	131160127	131160252	1	0.0650712	43
chr10	131201752	131203002	1	0.000168784	105
chr10	131208002	131208377	1	0.00246724	122
chr10	131323252	131323877	1	0.0156904	111
chr10	131324127	131324502	1	0.0055323	77
chr10	131519502	131520252	1	0.00577676	167
chr10	131630880	131631130	1	0.000734445	107
chr10	131811630	131811755	1	0.0275103	36
chr10	131812005	131812880	1	0.00565271	120
chr10	131832380	131833130	1	0.00870726	187
chr10	131845130	131846130	1	0.00558679	117
chr10	131869380	131870880	1	0.00703071	206
chr10	131946880	131948005	1	0.015375	120
chr10	131948255	131948630	1	0.0198485	91
chr10	132010505	132011130	1	0.0176382	114
chr10	132184505	132185005	1	0.00721034	115
chr10	132412380	132413130	-1	0.00890828	-68
chr10	132464880	132465380	-1	0.00329167	-71
chr10	132518505	132518880	-1	0.000420304	-88
chr10	132533255	132533505	1	0.00251028	162
chr10	132640505	132640755	1	0.00189692	78
chr10	132647255	132647505	-1	0.017563	-85
chr10	132709380	132710130	1	0.0493136	72
chr10	133005630	133006380	1	0.00499688	71
chr10	133058130	133058380	1	0.0217427	67
chr10	133259130	133259880	-1	0.00969463	-68
chr10	133334880	133336380	-1	0.00128908	-82
chr10	133366630	133367130	1	0.0167346	74
chr10	133465380	133465880	1	0.02811	92
chr10	133537380	133538880	1	0.0104714	169
chr11	210250	210750	1	0.0260948	88
chr11	212500	212625	1	0.010142	69
chr11	212875	213250	1	0.00190038	74
chr11	313500	314250	-1	0.00172248	-105
chr11	441125	441750	1	0.0181588	205
chr11	442375	442500	1	0.00771678	74
chr11	443375	444000	1	0.00214619	77
chr11	793500	794375	1	0.000959342	75
chr11	810750	812750	1	0.00383149	94
chr11	1288750	1290000	1	0.0153872	107
chr11	1410000	1410750	-1	0.0564914	-85
chr11	1415500	1416000	1	0.00348681	79
chr11	1521125	1522500	1	0.00846268	143
chr11	1926875	1927500	-1	0.0445131	-79
chr11	2364000	2365500	1	0.00795926	116
chr11	2534000	2534250	-1	0.0176255	-116
chr11	2652750	2653500	-1	0.00382775	-72
chr11	2901375	2902250	1	0.0263291	24
chr11	2902500	2903935	1	0.0131128	49
chr11	3180125	3181500	1	0.00311167	202
chr11	3281625	3282223	1	0.00712153	39
chr11	3345750	3346500	1	0.0454809	88
chr11	3360000	3360250	1	0.0193076	158
chr11	3360625	3360750	1	0.0404926	135
chr11	3361000	3361250	1	0.0203093	73
chr11	3399500	3399625	1	0.00953583	58
chr11	3428250	3428375	1	0.00489965	65
chr11	3626375	3627750	1	0.0240249	148
chr11	3673500	3674250	1	0.0092757	76
chr11	3824250	3824875	1	0.000179981	70
chr11	3837000	3837750	1	0.00749241	117
chr11	4134750	4135500	1	0.00132046	100
chr11	4474625	4475250	1	0.00637395	73
chr11	4915500	4915625	1	0.00979264	74
chr11	5036000	5037000	1	0.00323501	131
chr11	5037250	5037500	1	0.0166044	69
chr11	5383500	5384250	1	0.0117352	80
chr11	5624250	5625000	-1	0.0227494	-83
chr11	6287625	6288500	1	0.000594801	126
chr11	6300125	6301500	1	0.00257109	79
chr11	6481000	6482250	1	0.000107418	152
chr11	7995000	7995375	1	0.0235755	109
chr11	7995625	7995750	1	0.0252162	94
chr11	8097000	8098500	1	0.00671839	88
chr11	8505000	8505750	1	0.0219142	77
chr11	8831750	8831875	1	0.00501804	72
chr11	9125000	9126500	1	0.0156903	146
chr11	9273000	9275000	1	0.00968426	146
chr11	9363750	9363875	1	0.00803138	79
chr11	9451875	9452250	1	0.00133302	78
chr11	9612750	9614625	1	0.00109242	140
chr11	9740375	9740750	1	0.00346513	137
chr11	9741125	9741750	1	0.001907	170
chr11	10354500	10356625	1	0.00161125	179
chr11	10395000	10395125	1	0.0316289	172
chr11	10395375	10395625	1	0.00563405	182
chr11	10395875	10396250	1	0.037249	134
chr11	10823125	10823250	1	0.0168678	91
chr11	10900250	10900375	1	0.00551512	101
chr11	10924500	10925750	1	0.012172	145
chr11	10926000	10927500	1	0.00122066	107
chr11	10983125	10983500	-1	0.0239204	-82
chr11	11244125	11244750	1	0.00352378	72
chr11	12042750	12044250	1	0.00735451	133
chr11	12076125	12077000	1	0.0108607	97
chr11	12079500	12080125	1	0.00275629	130
chr11	12473000	12473125	1	0.00683556	84
chr11	12801750	12803250	1	0.0074611	132
chr11	12879000	12879125	1	0.0693853	49
chr11	12879500	12880875	1	0.00650784	115
chr11	12881125	12881250	1	0.043861	54
chr11	13072625	13074125	1	0.00961843	200
chr11	13074500	13074750	1	0.0173279	54
chr11	13095000	13096625	1	0.00235307	189
chr11	13098000	13098750	1	0.0293692	100
chr11	13260875	13262500	1	0.00202911	214
chr11	14331000	14331750	1	0.00240127	83
chr11	14754250	14754375	1	0.053665	65
chr11	14754625	14755875	1	0.00382535	137
chr11	15053250	15054000	1	0.0063699	74
chr11	15062250	15063000	1	0.00270786	70
chr11	15063250	15063750	1	0.0321858	74
chr11	15069125	15070500	1	0.00308322	102
chr11	15307500	15307875	1	0.0241053	83
chr11	15411750	15412375	1	0.000279745	84
chr11	15412750	15412875	1	0.0327718	73
chr11	15519000	15520500	1	0.00331175	159
chr11	16678500	16679250	1	0.000738218	105
chr11	16775250	16776000	1	0.00146529	76
chr11	16864500	16865250	1	0.000472819	72
chr11	16923750	16924375	-1	0.00817184	-69
chr11	17351000	17352375	1	0.00126612	351
chr11	17463750	17463875	1	0.0114598	172
chr11	17464375	17464500	1	0.000470864	110
chr11	17533500	17534125	1	0.000962592	88
chr11	17747250	17747875	-1	0.0474296	-75
chr11	18132250	18133625	1	0.00100767	237
chr11	18310750	18311250	1	0.00420766	118
chr11	18407250	18408000	1	0.0200665	130
chr11	18527875	18528000	1	0.00207111	71
chr11	18706000	18706125	1	0.00130149	108
chr11	18852875	18854250	-1	0.00947945	-77
chr11	19155750	19156500	1	0.0116904	78
chr11	19196250	19197000	1	0.00619312	83
chr11	19442125	19443000	1	0.0151283	159
chr11	19447625	19448000	1	0.00280073	94
chr11	19595250	19596125	1	0.0277594	115
chr11	19829250	19829375	1	0.00394611	93
chr11	19832250	19833750	1	0.00253223	87
chr11	19944000	19944750	-1	0.00356833	-85
chr11	20367000	20368500	1	0.00794006	173
chr11	20637000	20637750	1	0.00872523	83
chr11	20950500	20951250	1	0.00844974	86
chr11	20951875	20952000	1	0.0543277	87
chr11	22458750	22460125	1	0.000449151	128
chr11	22976250	22977000	1	0.015367	68
chr11	23439750	23440500	1	0.0104494	70
chr11	23998500	24000125	1	0.0062244	198
chr11	24000625	24000750	1	0.0541936	46
chr11	24748125	24748250	1	0.000652166	75
chr11	26685875	26687250	1	0.00109312	169
chr11	26964000	26964250	1	0.0180811	42
chr11	26964500	26964875	1	0.0141698	92
chr11	27097000	27097875	1	0.00266405	90
chr11	30597000	30597750	1	0.00990096	73
chr11	30741000	30741750	1	0.0308623	84
chr11	30939000	30939750	-1	0.00427346	-89
chr11	32445750	32446125	1	0.0136451	107
chr11	32446625	32446875	1	0.0329091	103
chr11	32721750	32722500	1	0.00200455	69
chr11	33044250	33045000	1	0.0163688	85
chr11	33532125	33532250	1	0.00888387	77
chr11	33552000	33553500	1	0.00332891	153
chr11	33562250	33562375	1	0.00814266	98
chr11	33583875	33584125	1	0.00886845	83
chr11	33722250	33723750	1	0.000614033	257
chr11	34159250	34159375	1	0.00723519	93
chr11	34235125	34235250	1	0.00355851	166
chr11	34243625	34244750	1	0.0182588	137
chr11	34354125	34355250	1	0.00271199	156
chr11	34599750	34600375	1	0.0232259	92
chr11	34684500	34686590	1	0.00399733	153
chr11	35029750	35031375	1	0.000123237	197
chr11	35031625	35031750	1	0.0294605	68
chr11	35040000	35040125	1	0.0130459	66
chr11	35159250	35159875	1	0.0151685	77
chr11	35797000	35797125	1	0.027454	95
chr11	35797375	35797500	1	0.0178102	50
chr11	35798625	35799750	1	0.00459113	124
chr11	35825250	35826000	1	0.00609886	87
chr11	35858750	35860500	1	0.00271521	174
chr11	36062250	36063000	1	0.0135788	73
chr11	36148750	36150375	1	0.00998636	289
chr11	36297500	36297750	1	0.00770102	47
chr11	36361500	36362250	1	0.00814908	94
chr11	38111500	38112000	1	0.00156249	104
chr11	38112625	38112750	1	0.0227958	59
chr11	39790500	39791250	1	0.00706455	73
chr11	40329250	40330500	1	0.00481595	89
chr11	40444625	40446500	1	0.000102262	143
chr11	41139750	41141250	1	0.00571104	71
chr11	41877750	41878500	1	0.00105727	111
chr11	41978250	41978750	1	0.000419899	116
chr11	41979000	41979500	1	0.00221392	95
chr11	42037500	42037625	-1	0.0245536	-48
chr11	42038000	42038500	-1	0.0135486	-96
chr11	42038875	42039000	-1	0.000794253	-47
chr11	42561750	42562000	1	0.0120295	81
chr11	42834125	42834250	1	0.00252134	57
chr11	43267500	43268250	-1	0.0416951	-96
chr11	43919250	43921625	1	0.00213033	347
chr11	43986875	43988250	1	0.00266462	148
chr11	44139750	44140500	1	0.004013	100
chr11	44333875	44334125	1	0.0070814	78
chr11	44607000	44608250	1	0.00651596	102
chr11	44635000	44635125	1	0.0117591	85
chr11	44858250	44859750	1	0.0166137	111
chr11	45223000	45224750	1	0.00127193	182
chr11	45551250	45552000	-1	0.0318658	-73
chr11	45809250	45809375	1	0.0335075	61
chr11	45809875	45810000	1	0.00367385	60
chr11	45931625	45932000	1	0.00535894	69
chr11	46248125	46248750	1	0.0199405	80
chr11	46370750	46370875	1	0.00394591	53
chr11	46371500	46371625	1	0.00732414	63
chr11	46796250	46796625	1	0.0272224	60
chr11	46947000	46947750	1	0.00815463	69
chr11	47234125	47235750	1	0.00442567	264
chr11	47439750	47440000	1	0.0136806	75
chr11	47440750	47441250	1	0.00792665	91
chr11	47441625	47441750	1	0.0383323	123
chr11	47494625	47496000	1	0.00378286	103
chr11	47733125	47733500	1	0.00120573	80
chr11	47779500	47780250	1	0.000670876	79
chr11	47803500	47803875	1	0.00548242	86
chr11	49420125	49420250	1	0.0206408	12
chr11	50333625	50333750	1	0.00702593	75
chr11	55341824	55342574	1	0.0106433	68
chr11	55734074	55734199	1	0.0139243	65
chr11	55992199	55992449	1	0.00516462	73
chr11	57082074	57083824	1	0.0054673	211
chr11	57230324	57231074	1	0.0218945	84
chr11	57276824	57277574	1	0.00293465	205
chr11	57321949	57322324	1	0.00809321	74
chr11	57345199	57345824	1	0.00165036	109
chr11	57367574	57368324	1	0.00406564	74
chr11	57405074	57405824	1	0.0196268	70
chr11	57565949	57566949	-1	0.0240577	-104
chr11	58044324	58044699	1	0.0227818	66
chr11	58180574	58181074	1	0.0256156	69
chr11	58576824	58576949	1	0.000512212	72
chr11	59064824	59065574	1	0.00878285	69
chr11	59080574	59082824	1	8.78621e-05	128
chr11	59188574	59189324	1	0.0334599	101
chr11	59199074	59201074	1	0.00246092	164
chr11	59574074	59575574	1	0.00680691	116
chr11	59575824	59576324	1	0.0185039	65
chr11	59649574	59650449	1	0.000219054	94
chr11	59810324	59811074	1	0.00048441	73
chr11	59900449	59901949	1	0.000842806	105
chr11	60177324	60178824	1	0.0100024	165
chr11	60179074	60179199	1	0.0592248	36
chr11	60532824	60533475	-1	0.0089953	-28
chr11	60706574	60706824	1	0.0249628	77
chr11	60789949	60790574	1	0.0280356	86
chr11	60840824	60842324	1	0.000288322	126
chr11	61092074	61092824	1	0.0558688	84
chr11	61467074	61468699	1	0.00472378	154
chr11	61468949	61469324	1	0.00726486	35
chr11	61611074	61611824	1	0.0212498	82
chr11	61771574	61772074	-1	0.0340006	-80
chr11	61773199	61773824	-1	0.0120947	-83
chr11	61840699	61841324	1	0.00113106	93
chr11	61850324	61851074	1	0.00616813	70
chr11	61958074	61958324	1	0.0135349	68
chr11	61972074	61973949	1	0.000628019	291
chr11	62043949	62045199	1	0.00230322	144
chr11	62104574	62106074	1	0.00598189	158
chr11	62600199	62600449	1	0.0123351	94
chr11	62607074	62608074	1	0.00670614	147
chr11	62798449	62799074	1	0.0140726	64
chr11	62880824	62883199	1	0.0012061	323
chr11	62883449	62883574	1	0.0733151	86
chr11	63027824	63028574	1	0.0221559	86
chr11	63545449	63545574	1	0.00592665	65
chr11	63562574	63564074	-1	0.0185336	-91
chr11	63567199	63567824	1	0.00254065	74
chr11	63581324	63582074	1	0.0025658	80
chr11	63867199	63868574	1	0.0044081	77
chr11	63999074	63999824	-1	0.0145702	-70
chr11	64089074	64089824	1	0.00251334	88
chr11	64240199	64240574	-1	0.0126228	-89
chr11	64258574	64259324	1	0.0113979	72
chr11	64269074	64269824	-1	0.0684244	-100
chr11	64303699	64304324	1	0.00559506	77
chr11	64611074	64611824	1	0.00394364	72
chr11	64659074	64659699	1	0.0434151	77
chr11	64790824	64791074	1	0.0091622	94
chr11	64854199	64856324	1	0.00347221	240
chr11	64905824	64906574	1	0.000913768	92
chr11	64996699	64997324	-1	0.00410527	-110
chr11	65054074	65054949	1	0.000702866	92
chr11	65278574	65280324	1	0.00053031	129
chr11	65280574	65280824	1	0.0134539	72
chr11	65444699	65445324	1	0.00243009	87
chr11	65498949	65499074	1	0.000445177	96
chr11	65634824	65635574	1	0.0020594	74
chr11	65712824	65714199	1	0.014444	94
chr11	65775824	65776574	-1	0.0058448	-135
chr11	65855449	65855699	1	0.0147193	80
chr11	66054949	66056449	1	0.00147888	101
chr11	66056824	66057824	1	0.0172413	178
chr11	66638324	66639824	1	0.00031524	105
chr11	66686324	66686949	1	0.0205365	82
chr11	66693324	66694574	1	0.00713887	75
chr11	66699574	66699824	1	0.00976068	188
chr11	66849074	66849449	1	0.0240048	74
chr11	66970699	66971949	1	0.0033593	184
chr11	67032074	67032824	1	0.0121075	116
chr11	67071074	67071824	1	0.0127978	71
chr11	67239824	67241324	1	0.00532275	120
chr11	67270699	67272074	1	0.00711633	114
chr11	67299824	67299949	1	0.0147879	84
chr11	67301199	67301324	1	0.0152373	48
chr11	67464074	67465074	-1	0.00835902	-109
chr11	67465324	67465574	-1	0.0592659	-79
chr11	67544324	67545074	1	0.00561015	84
chr11	67562574	67562699	1	0.0148591	78
chr11	67563074	67563449	1	0.00158964	481
chr11	68181824	68183324	1	0.00687221	91
chr11	68275199	68276574	1	0.0271871	139
chr11	68347949	68348324	1	0.0151868	76
chr11	68670574	68670824	-1	0.0183557	-66
chr11	68673074	68674199	1	0.0162045	103
chr11	68707699	68709074	1	0.000861382	100
chr11	68811824	68812574	1	0.0324037	137
chr11	68934074	68934449	1	0.00946096	127
chr11	68935824	68936074	1	0.0174405	129
chr11	68936574	68937074	1	0.00958578	106
chr11	68962574	68963324	1	0.0195316	73
chr11	69047449	69048324	1	0.0040259	87
chr11	69135824	69136574	1	0.0830078	69
chr11	69297074	69297574	1	0.00957059	149
chr11	69417074	69418449	1	0.020347	148
chr11	69450199	69450824	1	0.0164632	76
chr11	69477699	69477824	1	0.0071491	77
chr11	69543074	69543449	1	0.0157557	75
chr11	69970699	69971074	1	0.0126047	102
chr11	70014324	70014574	1	0.0268793	91
[truncated: 9,999 more rows]
