# Supplementary material for: Correcting signal biases and detecting regulatory elements in STARR-seq data
Source: HighWire-hosted journal article supplement (doi:10.1101/gr.269209.120), 2021-03-15
Supplement: Supplemental_Table_S5.xlsx [file Supplemental_Table_S5.xlsx]

## Sheet: Sheet1
Table S5: Regulatory elements in untreated A549 cells in Johnson et al. data that were detected by CRADLE. Regulatory element type indicates activating and repressive regulatory elements for '1' and '-1', respectively.
chromosome	start	end	regulatory element type	p value	effect size
chr1	10059	10258	-1	0.00108773	-7
chr1	30374	31276	1	0.000508134	11
chr1	39627	40103	1	0.00178521	10
chr1	48923	49130	1	0.00181097	8
chr1	49388	49517	1	0.0039633	9
chr1	51391	51538	1	0.00117296	8
chr1	54171	54376	1	0.00218071	8
chr1	54806	55120	1	0.000107571	7
chr1	55752	55838	1	0.000630069	7
chr1	56268	56444	1	0.00164621	10
chr1	56842	57042	1	0.00146227	8
chr1	57300	57457	1	0.000328986	10
chr1	58108	58867	1	1.14e-05	7
chr1	63285	63712	1	0.00103671	9
chr1	74270	74586	1	0.00303419	5
chr1	74758	75360	1	0.00356835	4
chr1	75532	76301	1	0.000124423	4
chr1	85053	85328	1	0.00643591	2
chr1	101934	102622	1	0.000133995	8
chr1	102966	103260	1	0.00314637	5
chr1	108773	109218	1	6.21e-05	12
chr1	113516	114225	1	4.89e-05	7
chr1	116210	116636	1	0.000165925	6
chr1	119883	120080	1	0.000382767	6
chr1	122501	122898	1	0.00435487	3
chr1	124380	124534	1	0.000638582	4
chr1	124881	124982	1	8.83e-05	3
chr1	127562	127906	1	0.00414641	11
chr1	128508	128594	1	0.0146438	3
chr1	128938	129373	1	0.000254857	7
chr1	134747	134958	1	0.000278699	7
chr1	144873	145279	1	0.00136492	9
chr1	258010	258096	1	0.00194092	3
chr1	261294	261700	1	0.000361221	7
chr1	263250	263686	1	0.000136202	4
chr1	263944	264092	1	0.000108602	8
chr1	264278	264460	1	0.00118007	4
chr1	265823	266502	1	0.000694925	9
chr1	267171	267556	1	0.00197989	13
chr1	268846	269276	1	1.72e-05	9
chr1	269706	269821	1	0.00333733	4
chr1	271433	272458	1	2.16e-06	8
chr1	272802	273077	1	5.42e-05	10
chr1	273559	273662	1	0.00247179	11
chr1	274092	275038	1	7.23e-05	10
chr1	276267	276696	1	0.000338823	5
chr1	277527	277618	1	3.79e-05	3
chr1	278959	279275	1	1.02e-05	7
chr1	279872	280198	1	0.00794175	9
chr1	280800	281349	1	0.000400121	10
chr1	281522	281883	1	0.000106852	11
chr1	282665	282778	1	0.000309622	8
chr1	283380	283489	1	0.00231287	6
chr1	284204	284498	1	0.000228699	9
chr1	284842	285100	1	0.00178157	6
chr1	285530	285715	1	3.54e-05	10
chr1	286463	286734	1	0.00279224	4
chr1	288460	288850	1	0.000217298	6
chr1	290387	290779	1	0.000109154	9
chr1	296139	296624	1	0.000252391	6
chr1	357191	357494	1	0.000686274	6
chr1	438040	438301	1	0.00654455	2
chr1	494684	494955	1	0.000236883	17
chr1	502171	502338	1	0.00241609	8
chr1	509081	509476	1	0.000874917	5
chr1	509820	509919	1	9.71e-05	6
chr1	517270	517642	1	0.00119114	10
chr1	529820	530117	1	0.00350404	7
chr1	531152	531428	1	0.0214242	6
chr1	587364	587519	1	0.000735509	11
chr1	588482	588826	1	0.00503613	10
chr1	589755	589858	1	0.000256716	7
chr1	590632	591062	1	0.000549387	9
chr1	592782	593470	1	8.46e-05	9
chr1	594416	595448	1	3.26e-05	13
chr1	596136	596394	1	0.000194068	15
chr1	599834	600833	1	5.42e-06	11
chr1	601416	601640	1	1.29e-05	10
chr1	602977	603188	1	0.00407314	8
chr1	603891	604141	1	0.00228908	6
chr1	605596	605682	1	0.00134476	11
chr1	607574	607703	1	4.93e-05	12
chr1	612979	613078	1	0.00956932	6
chr1	613250	613447	1	0.00354164	7
chr1	613909	614211	1	6.65e-06	11
chr1	614986	615142	1	0.0112517	9
chr1	615486	616475	1	0.000503917	9
chr1	617624	619670	1	0.000620033	7
chr1	621104	622168	1	0.00084882	9
chr1	622877	623656	1	0.000312836	10
chr1	624086	624409	1	0.000738579	9
chr1	625892	625978	1	0.00761649	8
chr1	626494	626664	1	0.00313855	8
chr1	626838	627784	1	8.04e-05	14
chr1	628042	628401	1	0.000263065	12
chr1	630966	631052	-1	0.00110948	-15
chr1	635610	635962	1	0.000185951	10
chr1	636507	636642	1	0.000161816	7
chr1	637330	637502	1	0.00353762	11
chr1	638192	638362	1	0.00179516	13
chr1	638792	638878	1	0.00747269	6
chr1	640091	640885	1	0.000532387	10
chr1	642810	643350	1	2.26e-05	9
chr1	644436	645185	1	4.12e-06	5
chr1	646016	647134	1	3.29e-06	8
chr1	650140	650574	1	0.000187914	8
chr1	656594	656680	1	0.01286	3
chr1	656938	657522	1	0.00276764	8
chr1	666140	666312	1	0.00501469	11
chr1	666656	666742	1	0.00607536	9
chr1	667258	667491	1	3.64e-05	6
chr1	674654	675246	1	0.000453657	10
chr1	676381	677406	1	0.000462338	9
chr1	677578	677922	1	0.00155368	5
chr1	678266	678680	1	0.00580372	5
chr1	682730	683135	1	0.000106278	6
chr1	686754	687503	1	0.000345268	10
chr1	689760	690650	1	2.49e-05	5
chr1	691338	691699	1	0.00158377	4
chr1	698381	698826	1	0.0138397	13
chr1	701023	701142	1	0.00579794	5
chr1	701314	702375	1	3.08e-05	5
chr1	704385	704875	1	1.13e-06	6
chr1	708194	709078	1	1.29e-05	5
chr1	713635	714035	1	0.0043962	5
chr1	715539	716252	1	0.00136829	4
chr1	729780	729866	1	0.00818506	10
chr1	730468	732281	1	0.000163272	8
chr1	732516	732704	1	0.000132676	6
chr1	732962	733392	1	0.000252949	14
chr1	736699	736832	1	0.00158512	21
chr1	737348	737434	1	0.00697579	14
chr1	737778	737864	1	0.000680224	10
chr1	738638	738810	1	0.00041786	9
chr1	739068	739154	1	0.00596526	5
chr1	740273	741125	1	0.00195147	14
chr1	744085	744714	1	0.000416739	12
chr1	749086	749302	1	5.25e-05	6
chr1	752344	753086	1	0.000560972	11
chr1	755150	755617	1	0.000426477	9
chr1	757330	758160	1	0.000423667	7
chr1	758418	758924	1	9.68e-05	7
chr1	760859	760998	1	0.000160492	7
chr1	761256	763802	1	2.74e-05	8
chr1	764649	764868	1	0.00182239	8
chr1	765104	765384	1	0.00066707	4
chr1	765642	765884	1	3.28e-05	7
chr1	766158	766416	1	0.00627245	6
chr1	766588	766674	1	0.00652534	12
chr1	768333	768480	1	0.000120997	6
chr1	773124	773210	1	0.000122352	15
chr1	773468	773602	1	7.44e-05	11
chr1	773984	774158	1	0.000102163	6
chr1	774375	774500	1	0.000781683	5
chr1	789378	789464	1	7.74e-05	9
chr1	796344	797032	1	7.2e-05	8
chr1	797892	797978	1	0.000629722	8
chr1	800957	801332	1	0.000502329	7
chr1	801504	801762	1	0.000147289	7
chr1	806062	806406	1	0.000150237	4
chr1	806922	807180	1	0.000148351	16
chr1	807438	807610	1	0.000430609	14
chr1	808298	808452	1	9.66e-05	8
chr1	809493	809588	1	3.7e-05	10
chr1	810276	810448	1	0.000973397	4
chr1	811824	811923	1	0.000175418	9
chr1	813200	813559	1	0.000269013	9
chr1	814229	815092	1	4.28e-05	10
chr1	824380	824466	1	0.00112233	7
chr1	834098	834184	-1	0.00067457	-32
chr1	838914	839172	1	0.000254444	6
chr1	840548	840634	1	0.0021766	8
chr1	854996	855512	-1	0.000224836	-73
chr1	867552	867638	-1	0.00013946	-32
chr1	875464	875916	1	0.0002023	134
chr1	877270	877786	-1	0.000617337	-74
chr1	877958	878044	-1	0.00681336	-31
chr1	882774	883204	1	0.000369001	69
chr1	890342	890514	-1	0.000158196	-33
chr1	906080	906252	-1	8.34e-05	-54
chr1	915712	916142	1	0.0032908	85
chr1	918808	919066	-1	0.00126079	-51
chr1	921474	921732	-1	0.000276807	-86
chr1	922936	923022	1	0.00410855	84
chr1	923194	923452	1	0.00480858	89
chr1	925000	925344	-1	0.000485855	-39
chr1	925516	925860	-1	0.00127805	-38
chr1	931106	931364	-1	0.000813638	-29
chr1	934030	934976	-1	0.000935859	-23
chr1	935492	935578	1	0.00369149	51
chr1	937040	937212	1	0.00337744	76
chr1	938416	938846	1	0.000324519	152
chr1	941340	942028	1	9.7e-05	63
chr1	942458	942802	-1	0.00109206	-26
chr1	943060	943404	1	0.000349063	92
chr1	948134	948392	-1	0.0007065	-80
chr1	950026	950112	-1	0.00755012	-70
chr1	950370	950456	-1	0.00651534	-74
chr1	950800	951058	-1	0.00238341	-71
chr1	951230	951316	-1	0.00959856	-39
chr1	953466	953896	1	7.71e-05	154
chr1	955788	956046	-1	6.08e-06	-56
chr1	960690	961464	-1	4.07e-06	-64
chr1	971440	971526	1	0.000137067	29
chr1	972988	973246	-1	0.000181133	-64
chr1	975310	975396	-1	8.79e-05	-35
chr1	980212	980556	1	9.07e-05	146
chr1	983824	984254	1	0.000145813	110
chr1	996036	996122	1	7.46e-05	35
chr1	999046	999734	-1	0.000468308	-95
chr1	1004894	1004980	-1	0.000128265	-63
chr1	1006356	1007044	1	0.000353902	248
chr1	1008850	1008936	-1	0.000426818	-39
chr1	1012978	1013752	1	1.25e-05	809
chr1	1017966	1018138	1	0.000309013	49
chr1	1021062	1021578	1	4.75e-06	79
chr1	1021836	1022352	1	1.84e-05	138
chr1	1024416	1025190	1	5.62e-06	351
chr1	1031984	1032242	-1	0.00161197	-66
chr1	1038520	1038864	-1	0.000289472	-89
chr1	1041530	1041616	-1	0.000514284	-63
chr1	1043422	1044196	-1	0.000536282	-74
chr1	1046088	1046346	-1	5.37e-05	-58
chr1	1046604	1046690	-1	0.000480418	-38
chr1	1053484	1053570	-1	0.00512019	-71
chr1	1053742	1054430	1	2.6e-09	801
chr1	1056064	1056580	-1	2.7e-05	-72
chr1	1057526	1057698	1	0.000406368	14
chr1	1058558	1058730	-1	0.000649782	-58
chr1	1060278	1060708	-1	0.000154204	-57
chr1	1063976	1064750	1	1.4e-06	514
chr1	1069480	1070512	1	9.65e-06	183
chr1	1071974	1072404	-1	0.000236619	-68
chr1	1073522	1073608	1	0.00460761	91
chr1	1074382	1075070	-1	0.0011495	-80
chr1	1079886	1080230	-1	0.00016758	-59
chr1	1085304	1085476	1	0.00279994	101
chr1	1086594	1087110	-1	3.85e-05	-74
chr1	1087798	1087970	1	0.0011457	64
chr1	1089346	1089432	-1	4.77e-05	-63
chr1	1105858	1105944	1	1.05e-05	8
chr1	1107148	1107664	1	0.000228763	168
chr1	1123316	1124520	-1	9.53e-07	-114
chr1	1133292	1133464	1	8.62e-05	45
chr1	1136044	1136560	-1	0.000190859	-54
chr1	1156598	1156684	-1	0.00339891	-45
chr1	1178872	1179216	1	0.00053675	124
chr1	1181108	1181710	-1	2.94e-05	-41
chr1	1195126	1195212	-1	0.000115439	-31
chr1	1203812	1203984	-1	0.00623978	-61
chr1	1215250	1215422	1	0.00521765	152
chr1	1217400	1217572	-1	0.0014113	-54
chr1	1217744	1218260	1	0.000132936	206
chr1	1222818	1223248	-1	0.00157211	-112
chr1	1224538	1224882	-1	2.75e-05	-48
chr1	1225742	1225914	-1	4.86e-05	-73
chr1	1232536	1233138	-1	0.00252033	-95
chr1	1235890	1235976	-1	0.000876316	-65
chr1	1237868	1238470	1	2.51e-06	150
chr1	1245780	1245866	-1	0.00159435	-57
chr1	1246898	1246984	-1	0.00157993	-31
chr1	1247930	1248016	1	0.000526662	69
chr1	1248188	1248274	1	0.000591214	41
chr1	1251026	1251112	1	0.000100169	75
chr1	1264700	1265388	1	7.33e-05	228
chr1	1270720	1271064	-1	0.000943316	-61
chr1	1272698	1273300	-1	0.00013233	-96
chr1	1274332	1274676	-1	0.000272875	-57
chr1	1275020	1275364	-1	0.000262567	-69
chr1	1277514	1277600	-1	2.05e-05	-26
chr1	1278546	1279320	1	8e-05	122
chr1	1281298	1281728	-1	0.00104436	-82
chr1	1281900	1282502	1	1.6e-05	201
chr1	1283878	1283964	1	0.000622069	47
chr1	1285254	1285512	-1	0.000385782	-66
chr1	1292478	1292908	-1	0.000651723	-58
chr1	1293252	1293424	-1	0.00197686	-55
chr1	1299186	1299272	-1	0.000780934	-85
chr1	1302110	1302196	1	0.00010519	73
chr1	1303744	1304088	-1	0.000791081	-63
chr1	1304604	1305034	1	0.00160509	206
chr1	1306324	1306410	1	0.00136936	57
chr1	1307614	1307958	-1	9.71e-05	-39
chr1	1314150	1314322	-1	0.00272557	-72
chr1	1321288	1321460	-1	0.00113312	-69
chr1	1321890	1321976	-1	0.000245566	-78
chr1	1329458	1329802	-1	0.000224544	-122
chr1	1334016	1334102	-1	0.000211932	-81
chr1	1340638	1341240	-1	5.65e-07	-109
chr1	1343218	1343476	-1	0.000399138	-53
chr1	1344680	1345798	1	7.69e-09	235
chr1	1346142	1346486	1	0.00456042	96
chr1	1354312	1354828	-1	0.00110194	-61
chr1	1358870	1358956	1	0.00205956	75
chr1	1373920	1374264	-1	0.00559185	-72
chr1	1374866	1374952	-1	0.000256301	-51
chr1	1393614	1393700	-1	7.46e-05	-65
chr1	1399204	1399548	1	0.00235812	142
chr1	1407460	1407976	-1	1.13e-05	-76
chr1	1420188	1420274	-1	5.12e-05	-44
chr1	1421048	1421908	1	8.2e-09	446
chr1	1431798	1432228	1	0.0002356	77
chr1	1432400	1432486	-1	2.04e-05	-42
chr1	1439108	1439796	-1	0.000110276	-53
chr1	1440484	1440570	1	0.00530701	55
chr1	1452008	1452180	-1	0.000140577	-49
chr1	1467832	1467918	-1	0.00109179	-48
chr1	1469896	1469982	-1	0.000179703	-38
chr1	1471014	1471272	-1	0.000158189	-42
chr1	1474540	1474626	-1	0.000112863	-29
chr1	1476604	1476690	-1	0.001087	-22
chr1	1479872	1479958	-1	0.000166222	-68
chr1	1481936	1482022	-1	0.000924685	-53
chr1	1516078	1516164	-1	0.000393543	-61
chr1	1520120	1520206	-1	0.000315416	-53
chr1	1522872	1523044	-1	7.03e-05	-53
chr1	1532848	1533278	-1	0.00182297	-64
chr1	1535342	1535772	-1	0.000118647	-66
chr1	1536890	1537062	-1	3.01e-05	-43
chr1	1538008	1538094	-1	0.00211179	-79
chr1	1539470	1539642	-1	0.000609032	-58
chr1	1543684	1544114	-1	0.000160321	-62
chr1	1622804	1622890	-1	0.00486266	-57
chr1	1625986	1626072	-1	0.000476738	-21
chr1	1626588	1626760	-1	0.000840458	-28
chr1	1636650	1637338	-1	0.000779646	-84
chr1	1649722	1649808	-1	0.000408635	-26
chr1	1661676	1661865	1	0.000210968	13
chr1	1671652	1671996	-1	0.000277131	-53
chr1	1714408	1714738	1	4.09e-05	9
chr1	1718264	1718350	1	0.00110433	17
chr1	1727638	1727777	1	9.65e-05	12
chr1	1728114	1728240	1	0.000221665	11
chr1	1753954	1754126	1	0.00184956	84
chr1	1760404	1760920	-1	0.00059273	-63
chr1	1788784	1789300	-1	9.43e-06	-92
chr1	1852768	1853284	-1	0.00112402	-50
chr1	1892242	1892500	-1	0.000708429	-87
chr1	1893532	1893962	-1	0.00411729	-74
chr1	1907120	1907980	1	2.03e-06	449
chr1	1919762	1919848	1	0.00220336	130
chr1	1958032	1958548	1	2.58e-06	207
chr1	1968438	1968610	-1	0.00342375	-78
chr1	1970932	1971448	-1	4.97e-05	-117
chr1	1978930	1979532	1	0.000321765	74
chr1	1984864	1985294	-1	7.6e-05	-68
chr1	2027692	2027950	-1	0.00140792	-61
chr1	2035948	2036464	-1	0.00209815	-75
chr1	2038012	2038958	-1	0.000291697	-63
chr1	2041796	2041968	-1	0.000794846	-69
chr1	2044634	2044806	-1	0.000363162	-41
chr1	2045752	2045924	-1	0.00104492	-79
chr1	2050568	2050740	-1	1.43e-05	-21
chr1	2077056	2077142	-1	4.47e-05	-63
chr1	2078260	2078346	-1	0.00022644	-51
chr1	2083936	2084452	-1	0.00080989	-58
chr1	2096320	2096664	-1	0.00011168	-73
chr1	2097610	2097782	-1	0.00372944	-38
chr1	2097782	2098384	1	4.75e-09	347
chr1	2107758	2107930	1	0.00165138	40
chr1	2108102	2108446	1	0.000282127	112
chr1	2108618	2108704	1	0.0127753	99
chr1	2132612	2132956	1	2.31e-05	81
chr1	2137600	2138116	-1	3.1e-05	-89
chr1	2145856	2146544	-1	5e-05	-85
chr1	2151102	2151360	-1	0.003953	-70
chr1	2163314	2163400	1	0.00220881	101
chr1	2172774	2173204	-1	1.32e-05	-82
chr1	2173720	2174064	-1	0.00141427	-70
chr1	2175698	2175870	-1	0.000826032	-57
chr1	2177160	2177848	-1	0.000189244	-74
chr1	2180256	2180944	1	0.00021134	356
chr1	2185072	2185588	-1	3.56e-05	-73
chr1	2227040	2227986	-1	1.98e-06	-53
chr1	2228704	2229792	-1	5.47e-06	-98
chr1	2242864	2243380	-1	0.000174949	-61
chr1	2255936	2256108	1	7.94e-05	64
chr1	2269610	2269696	-1	0.00199337	-64
chr1	2272448	2272534	1	3.85e-05	45
chr1	2303408	2303666	-1	0.0046257	-93
chr1	2320436	2320522	-1	0.000290491	-53
chr1	2323876	2324048	-1	6.98e-05	-57
chr1	2324564	2324908	1	0.000555817	74
chr1	2336260	2336518	1	0.00603691	62
chr1	2339614	2339872	-1	0.000167617	-59
chr1	2349332	2349418	-1	4.92e-05	-30
chr1	2358448	2358964	-1	1.63e-05	-54
chr1	2370660	2370746	1	0.000153423	9
chr1	2372380	2372896	-1	2.6e-05	-103
chr1	2379346	2379604	-1	1.44e-05	-55
chr1	2391472	2391730	1	0.00102471	143
chr1	2392074	2392160	-1	5.89e-05	-16
chr1	2401792	2402738	-1	0.000934378	-72
chr1	2402996	2403082	-1	0.000111099	-66
chr1	2403684	2403770	1	6.26e-05	12
chr1	2406952	2407210	-1	0.000521316	-85
chr1	2407382	2407468	-1	0.00464157	-60
chr1	2427334	2427592	1	2.32e-05	74
chr1	2428366	2428968	1	2.81e-05	335
chr1	2430086	2430516	-1	8.88e-05	-79
chr1	2431118	2431892	1	5.25e-05	288
chr1	2432494	2432752	1	0.00038731	108
chr1	2439976	2440148	-1	0.000336352	-54
chr1	2443588	2443846	-1	7.06e-06	-45
chr1	2446770	2446856	-1	4.75e-05	-58
chr1	2813542	2814144	1	4.28e-05	107
chr1	2818616	2819132	-1	0.000608317	-62
chr1	2819390	2819906	-1	4.5e-06	-70
chr1	2858262	2858434	-1	0.00819952	-50
chr1	2868840	2869184	-1	6.6e-05	-68
chr1	2871162	2871678	-1	1.85e-08	-111
chr1	2879590	2879762	1	0.00520646	70
chr1	2880364	2880622	-1	0.00229396	-46
chr1	2882170	2882256	-1	0.0033684	-71
chr1	2885008	2885094	-1	0.000324575	-55
chr1	2887932	2888190	-1	0.00326425	-71
chr1	2916570	2917086	-1	0.000775277	-66
chr1	2922762	2922934	-1	0.000320668	-43
chr1	2923192	2923450	-1	4.07e-05	-59
chr1	2974362	2974964	1	2.2e-06	191
chr1	3001710	3002312	-1	0.000205699	-51
chr1	3003946	3004290	-1	0.00385921	-59
chr1	3004634	3005064	1	0.000491033	226
chr1	3014180	3014610	-1	0.00189766	-54
chr1	3030176	3030434	-1	0.000936509	-88
chr1	3054772	3054858	-1	8.62e-05	-57
chr1	3060534	3060620	1	0.000814875	72
chr1	3076100	3076186	-1	0.000160278	-70
chr1	3087882	3087968	-1	3.63e-05	-34
chr1	3106458	3106716	-1	6.86e-05	-67
chr1	3116262	3116348	-1	0.00312335	-58
chr1	3117810	3118412	-1	7.18e-06	-69
chr1	3120734	3121078	1	0.00168935	178
chr1	3160638	3160896	1	0.00478814	97
chr1	3164680	3165282	1	1.33e-07	221
chr1	3172076	3172334	-1	0.000809318	-59
chr1	3172592	3172850	-1	0.00248505	-58
chr1	3185406	3185836	-1	0.000552031	-87
chr1	3192802	3193060	1	0.00236947	108
chr1	3206562	3206906	-1	0.00114052	-68
chr1	3220752	3221182	-1	0.000149136	-83
chr1	3221440	3221526	-1	0.010446	-61
chr1	3228750	3229180	-1	0.000193472	-67
chr1	3229868	3230040	-1	0.000968491	-60
chr1	3235888	3236404	1	6.3e-05	84
chr1	3244230	3244574	-1	4.73e-06	-70
chr1	3247842	3248014	-1	0.000129455	-38
chr1	3253690	3253776	-1	0.000688035	-19
chr1	3262806	3263236	-1	0.0022654	-51
chr1	3265042	3265386	-1	0.000721625	-73
chr1	3269600	3270030	1	0.00153154	139
chr1	3281468	3281726	-1	0.00623708	-55
chr1	3297894	3298410	-1	0.000259643	-52
chr1	3304602	3305118	-1	0.000109243	-53
chr1	3308128	3308558	1	0.000161318	110
chr1	3310880	3310966	1	0.00137557	61
chr1	3312084	3312342	-1	4.17e-05	-67
chr1	3313116	3313546	1	0.000561503	116
chr1	3321974	3322060	1	4.64e-05	42
chr1	3365576	3366350	-1	0.000307021	-75
chr1	3373230	3373488	1	0.00342406	112
chr1	3378992	3379078	1	0.000355135	24
chr1	3383464	3384152	-1	0.000166033	-50
chr1	3387076	3387162	-1	9.45e-05	-25
chr1	3401094	3401524	-1	0.0146537	-52
chr1	3407802	3408490	-1	0.000526177	-66
chr1	3411930	3412704	-1	6.83e-05	-66
chr1	3467314	3467486	1	0.0027935	95
chr1	3469894	3470066	-1	3.13e-05	-67
chr1	3471270	3471700	1	0.00278714	65
chr1	3473850	3474366	-1	7.08e-05	-86
chr1	3480042	3480300	-1	0.000572939	-90
chr1	3481762	3482106	-1	0.000240306	-77
chr1	3492082	3492340	-1	0.00824726	-89
chr1	3493888	3493974	-1	0.000477258	-62
chr1	3495866	3496382	1	4.28e-05	73
chr1	3504036	3504724	1	3.56e-05	541
chr1	3504896	3504982	-1	0.00712868	-66
chr1	3505154	3505498	-1	0.00407559	-68
chr1	3510486	3511948	-1	0.000154444	-111
chr1	3515216	3515302	1	0.00398717	57
chr1	3516420	3516678	1	0.00154764	102
chr1	3518828	3519086	-1	0.00369089	-64
chr1	3519516	3519688	-1	0.00365969	-71
chr1	3521064	3521838	1	0.00079674	73
chr1	3522956	3523214	1	0.0026867	83
chr1	3554088	3554174	-1	6.67e-05	-53
chr1	3556496	3556754	-1	0.00590843	-80
chr1	3582210	3582296	-1	0.000697774	-82
chr1	3585822	3586682	1	5.53e-08	257
chr1	3588746	3589434	-1	0.00106829	-67
chr1	3595282	3595626	-1	0.00101183	-80
chr1	3597948	3598808	1	6.07e-05	473
chr1	3607064	3607150	-1	3.49e-05	-40
chr1	3610246	3610332	-1	0.000292329	-49
chr1	3624522	3624866	1	0.000835243	81
chr1	3631918	3632262	1	6.5e-07	108
chr1	3671650	3672166	1	0.000275371	99
chr1	3673456	3674316	1	0.000525861	132
chr1	3676294	3676466	-1	1.83e-05	-26
chr1	3680852	3681540	1	4.89e-06	293
chr1	3681798	3682142	-1	2.59e-05	-78
chr1	3683088	3683260	-1	0.00580807	-48
chr1	3685066	3685754	1	1.71e-05	137
chr1	3686184	3686528	-1	0.000715689	-86
chr1	3690054	3690914	1	9.85e-12	398
chr1	3691430	3691516	-1	0.00239415	-68
chr1	3696246	3696676	-1	0.00153373	-74
chr1	3698568	3698826	-1	0.00394258	-70
chr1	3699084	3699514	1	2.34e-06	197
chr1	3705620	3706050	-1	0.00126574	-67
chr1	3711554	3712242	-1	0.00271997	-69
chr1	3715768	3716026	-1	0.000211055	-75
chr1	3717316	3717660	1	3.73e-05	104
chr1	3718348	3718434	-1	0.00151838	-42
chr1	3721358	3721702	-1	0.000514871	-60
chr1	3722046	3722476	1	0.00181346	80
chr1	3730646	3730732	1	0.00230523	61
chr1	3732538	3732710	1	0.00335408	81
chr1	3745352	3746298	-1	6.42e-06	-80
chr1	3758166	3758252	1	3.28e-05	6
chr1	3758768	3758940	-1	8.43e-05	-17
chr1	3774506	3774678	-1	8.75e-05	-43
chr1	3779494	3779666	-1	8.75e-06	-59
chr1	3808304	3808390	-1	0.000248288	-45
chr1	3808562	3808734	-1	7.38e-05	-48
chr1	3816302	3816474	-1	0.000473598	-85
chr1	3822064	3822236	-1	1.63e-05	-58
chr1	3829546	3829890	1	0.000874209	104
chr1	3834706	3835050	-1	0.000320439	-45
chr1	3838490	3838920	1	1.68e-05	152
chr1	3857238	3857582	1	0.000923108	89
chr1	3865752	3865924	-1	0.00135394	-59
chr1	3866526	3866612	-1	0.00094147	-16
chr1	3867816	3867988	-1	0.00244822	-54
chr1	3869794	3870138	1	0.000672037	141
chr1	3877190	3877276	1	7.23e-06	30
chr1	3899808	3899894	1	3.42e-05	70
chr1	3944700	3945216	1	2.78e-06	188
chr1	3945818	3945990	-1	0.00202874	-33
chr1	3947796	3947882	-1	0.0011362	-32
chr1	3948226	3948570	1	8.25e-05	103
chr1	3973338	3973854	-1	0.000886112	-55
chr1	3985980	3986099	1	1.51e-05	16
chr1	4019778	4019864	-1	0.00404035	-72
chr1	4022358	4022874	-1	0.000127615	-74
chr1	4064326	4064777	1	0.000105323	17
chr1	4122462	4122720	-1	0.0082075	-64
chr1	4127106	4127192	1	0.00143769	62
chr1	4132868	4133212	1	2.8e-05	67
chr1	4216116	4216374	-1	3.57e-05	-32
chr1	4218180	4218352	-1	0.0013946	-65
chr1	4280874	4281390	-1	0.000151187	-74
chr1	4305728	4305814	1	6.61e-05	69
chr1	4310286	4310802	-1	0.000131062	-59
chr1	4342794	4343310	1	0.000550474	465
chr1	4355694	4355952	-1	0.0101864	-87
chr1	4365068	4365154	1	2e-05	8
chr1	4373668	4373754	-1	7.19e-05	-30
chr1	4380462	4380978	1	4.5e-05	109
chr1	4390352	4390610	-1	0.00171438	-54
chr1	4404284	4404370	-1	8.24e-05	-39
chr1	4408412	4408842	-1	0.000361176	-55
chr1	4420280	4420366	1	3.18e-05	10
chr1	4437394	4437824	-1	1.55e-05	-47
chr1	4440920	4441350	-1	2.39e-06	-36
chr1	4457002	4457088	-1	0.000623996	-31
chr1	4459926	4460442	-1	0.00015468	-72
chr1	4480566	4481082	1	5.72e-07	74
chr1	4495272	4495358	-1	0.000187774	-28
chr1	4507226	4507312	-1	7.58e-05	-54
chr1	4514622	4514794	-1	0.000160456	-52
chr1	4530790	4531564	1	4.04e-05	137
chr1	4536466	4536638	1	0.000656712	7
chr1	4540250	4540680	-1	3.48e-06	-22
chr1	4556074	4556504	1	5.95e-06	73
chr1	4616446	4616790	-1	0.00240361	-67
chr1	4652394	4653254	1	1.01e-05	130
chr1	4654372	4654630	-1	0.00052295	-10
chr1	4655060	4655490	-1	0.000105908	-49
chr1	4655662	4655834	-1	0.00373725	-47
chr1	4656350	4656436	-1	0.00530916	-47
chr1	4658070	4658500	-1	0.00126023	-61
chr1	4687568	4687740	-1	0.000431655	-72
chr1	4690922	4691266	1	0.000124401	109
chr1	4695136	4695566	-1	1.09e-05	-77
chr1	4702618	4703306	1	0.0006111	110
chr1	4711304	4711992	-1	0.00440297	-56
chr1	4723086	4723172	-1	0.0112961	-48
chr1	4723344	4723688	-1	0.000656164	-59
chr1	4754562	4755250	1	0.000105155	243
chr1	4759034	4759722	-1	0.00033897	-53
chr1	4774170	4774514	1	9.14e-05	204
chr1	4837896	4838068	1	0.00174884	78
chr1	5027526	5028042	-1	2.37e-06	-58
chr1	5083770	5084286	1	1.78e-06	243
chr1	5173124	5173296	-1	0.000250707	-44
chr1	5194194	5194452	-1	0.000116337	-61
chr1	5198322	5198408	-1	0.000207116	-40
chr1	5200042	5200128	-1	0.000234999	-48
chr1	5205030	5205374	1	3.02e-05	57
chr1	5217414	5218188	-1	5.46e-05	-50
chr1	5218790	5219220	1	0.00191317	106
chr1	5297738	5298254	1	0.000113943	154
chr1	5312874	5313390	1	0.0121334	141
chr1	5321388	5321474	-1	0.000385255	-18
chr1	5324226	5324312	-1	0.000471192	-23
chr1	5326290	5326462	-1	7.54e-05	-60
chr1	5327408	5327666	-1	0.000195228	-62
chr1	5333170	5333772	1	4.86e-05	201
chr1	5342974	5343318	-1	1.83e-05	-63
chr1	5364646	5364990	1	0.000103697	132
chr1	5387522	5387780	1	0.000143065	44
chr1	5390102	5390188	1	0.00414309	67
chr1	5391736	5391822	-1	0.000675748	-55
chr1	5404722	5405152	1	0.0021405	92
chr1	5405324	5405582	-1	8.73e-05	-37
chr1	5411000	5411086	-1	0.00120786	-48
chr1	5412290	5412462	-1	0.00112846	-84
chr1	5485304	5486250	-1	4.49e-07	-105
chr1	5517640	5517726	1	8.88e-05	5
chr1	5528648	5528734	-1	6.4e-06	-52
chr1	5532174	5532690	-1	0.000238887	-56
chr1	5601662	5601748	-1	7.64e-06	-43
chr1	5611638	5612326	1	2.04e-06	185
chr1	5615250	5615766	-1	3.38e-05	-62
chr1	5629010	5629096	-1	0.000114579	-57
chr1	5638298	5638384	1	0.000179656	36
chr1	5642598	5642770	-1	2.45e-05	-32
chr1	5666678	5666764	-1	2.5e-05	-25
chr1	5685770	5686372	1	0.000115898	182
chr1	5712258	5712516	-1	0.000777943	-66
chr1	5722406	5722492	1	9.25e-06	8
chr1	5733672	5733758	-1	8.21e-05	-61
chr1	5741498	5741756	1	0.00351593	332
chr1	5745626	5746142	1	0.000145418	69
chr1	5755086	5755258	1	0.0015498	108
chr1	5779424	5780456	1	5.67e-08	316
chr1	5795420	5796108	-1	4.19e-06	-76
chr1	5804536	5804880	-1	1.22e-06	-37
chr1	5810126	5810212	-1	0.000408293	-35
chr1	5814512	5814598	-1	8.69e-05	-45
chr1	5840226	5840742	-1	0.000244448	-63
chr1	5846676	5846762	-1	0.000200381	-47
chr1	5847364	5847622	-1	9.65e-05	-96
chr1	5852008	5852094	-1	0.000609168	-23
chr1	5854502	5854588	-1	0.000783708	-51
chr1	5858286	5859232	-1	0.000753387	-71
chr1	5864048	5864220	-1	0.000329361	-60
chr1	5867574	5868090	-1	0.000991884	-54
chr1	5873250	5873766	-1	0.00315336	-59
chr1	5879442	5880302	-1	0.000121061	-61
chr1	5881850	5882108	-1	0.000116608	-60
chr1	5888902	5889074	1	0.00229816	53
chr1	5890020	5890106	1	0.000858167	60
chr1	5908768	5909112	-1	0.00226772	-77
chr1	5917626	5918056	1	5.32e-05	160
chr1	5965356	5966044	1	1.88e-05	211
chr1	5966216	5966302	-1	0.00220254	-26
chr1	5967162	5967506	-1	0.000388958	-71
chr1	5975418	5975934	-1	0.0006541	-64
chr1	5976192	5976364	1	0.000167041	66
chr1	5999842	6000100	-1	0.00116789	-75
chr1	6002250	6002336	-1	9.31e-05	-85
chr1	6011022	6012054	-1	0.000143812	-56
chr1	6012742	6013000	1	0.00470803	72
chr1	6025986	6026502	1	0.00041371	195
chr1	6058752	6059096	1	2.75e-05	62
chr1	6059440	6059526	-1	0.00789049	-33
chr1	6070362	6070878	1	0.00121606	49
chr1	6073630	6073888	-1	0.00304614	-84
chr1	6074060	6074748	1	0.000157177	408
chr1	6094270	6095130	1	0.00094702	116
chr1	6111642	6111986	1	5.95e-05	118
chr1	6128928	6129444	-1	0.0016438	-86
chr1	6129616	6129702	-1	0.00530058	-51
chr1	6140968	6141054	1	0.000103776	11
chr1	6157824	6158082	1	0.000243526	93
chr1	6158684	6158770	-1	0.000299368	-31
chr1	6162468	6162554	-1	0.000571826	-40
chr1	6166854	6167112	-1	0.00212588	-70
chr1	6168058	6168144	-1	0.000348409	-49
chr1	6170036	6170380	-1	0.000716967	-56
chr1	6177690	6178120	-1	7.88e-05	-73
chr1	6178292	6178722	1	0.000469464	62
chr1	6199448	6199878	1	0.00154517	53
chr1	6205554	6206242	1	0.000586295	96
chr1	6206672	6206844	-1	0.00575513	-41
chr1	6207446	6207618	-1	0.000418766	-42
chr1	6224990	6225162	1	0.00436296	63
chr1	6251220	6251478	-1	0.00287218	-84
chr1	6261540	6261626	-1	0.000172513	-39
chr1	6263862	6264034	-1	0.011627	-56
chr1	6264206	6264894	-1	0.000560241	-68
chr1	6294994	6295252	-1	0.000116391	-61
chr1	6305314	6305400	-1	2.71e-05	-10
chr1	6343498	6343842	1	0.00496905	123
chr1	6350808	6351066	1	0.00289013	96
chr1	6367578	6368094	1	1.39e-05	156
chr1	6370072	6370158	-1	6.91e-05	-29
chr1	6382026	6382112	-1	1.32e-05	-32
chr1	6395270	6395700	1	2.7e-05	126
chr1	6396904	6396990	-1	0.000806389	-30
chr1	6399570	6400000	1	8.77e-05	6
chr1	6412556	6412814	-1	1.04e-05	-39
chr1	6414190	6415222	1	3.73e-06	502
chr1	6425628	6425972	1	1.99e-05	119
chr1	6427606	6427778	1	0.00440827	72
chr1	6444462	6444634	-1	0.00354296	-58
chr1	6447558	6447644	-1	0.000259536	-46
chr1	6454266	6454610	-1	0.000213452	-80
chr1	6461490	6461920	-1	0.00360587	-79
chr1	6463812	6463984	1	0.000751233	6
chr1	6468456	6468886	-1	0.00101049	-80
chr1	6470348	6470778	-1	0.00477843	-86
chr1	6472842	6473272	-1	0.000414253	-80
chr1	6475422	6475852	1	0.000184511	97
chr1	6488924	6489354	1	7.28e-05	90
chr1	6512316	6512574	1	0.000405683	76
chr1	6515670	6516100	1	0.00074651	69
chr1	6566238	6566840	-1	6.2e-05	-50
chr1	6570968	6571312	-1	0.000977098	-97
chr1	6592898	6593414	1	0.00202262	62
chr1	6599262	6599606	-1	0.00054443	-70
chr1	6600982	6601670	1	3.16e-06	400
chr1	6601842	6602186	-1	0.00056199	-115
chr1	6602444	6602530	-1	0.00525131	-101
chr1	6612678	6613194	-1	8.54e-06	-76
chr1	6621364	6621450	-1	0.000284422	-44
chr1	6623428	6623514	1	0.000201494	45
chr1	6625062	6625922	-1	4.41e-06	-58
chr1	6628158	6628244	-1	0.000387875	-44
chr1	6636328	6636586	-1	4.93e-05	-46
chr1	6642348	6642434	-1	0.000142711	-35
chr1	6644756	6645186	-1	0.00122426	-56
chr1	6743828	6744258	1	0.0034355	108
chr1	6802136	6802480	1	0.000415505	84
chr1	6818648	6818820	1	5.78e-06	11
chr1	6864486	6865002	1	1.08e-05	159
chr1	6918666	6918838	1	0.00537436	108
chr1	6919096	6919698	1	5.02e-06	111
chr1	6960118	6960290	1	0.00455384	56
chr1	7122486	7123002	-1	0.000810922	-57
chr1	7123518	7124034	-1	0.00111193	-49
chr1	7141148	7141234	-1	6.88e-05	-23
chr1	7193522	7193780	-1	1.08e-05	-57
chr1	7195070	7195242	-1	0.000106318	-55
chr1	7230846	7231362	1	0.000271194	171
chr1	7267482	7267998	1	0.00104216	218
chr1	7279006	7279092	-1	2.35e-05	-52
chr1	7288380	7288466	-1	4.51e-05	-39
chr1	7367758	7368274	-1	1.38e-05	-73
chr1	7386162	7386420	1	0.000299353	101
chr1	7401728	7402330	1	8.57e-05	305
chr1	7437246	7437590	-1	0.00405449	-56
chr1	7442922	7443438	-1	0.000142271	-82
chr1	7451178	7451694	-1	2.79e-05	-66
chr1	7459950	7460294	-1	0.00167025	-72
chr1	7467690	7468034	-1	0.000386919	-79
chr1	7470786	7471302	1	0.00234213	141
chr1	7473538	7474398	1	0.000375821	85
chr1	7500714	7501058	-1	0.00126385	-66
chr1	7526514	7526944	1	0.00282155	106
chr1	7551282	7551626	-1	0.000385555	-77
chr1	7562376	7562892	-1	0.00101745	-58
chr1	7563666	7563752	-1	1.97e-05	-51
chr1	7570374	7570546	1	0.00343774	111
chr1	7580264	7580522	-1	0.0022077	-63
chr1	7610106	7610278	-1	1.73e-05	-63
chr1	7616470	7616556	-1	1.53e-05	-61
chr1	7624038	7624554	-1	0.000534409	-69
chr1	7634100	7634358	-1	0.00149044	-52
chr1	7645968	7646828	-1	0.000164499	-58
chr1	7651128	7651214	-1	7.94e-06	-42
chr1	7656718	7657062	-1	0.000126783	-67
chr1	7704362	7704534	-1	1.81e-05	-28
chr1	7731968	7732054	1	0.000126948	6
chr1	7735752	7736440	1	2.19e-05	165
chr1	7869482	7869998	1	0.000403043	148
chr1	7940862	7941206	1	4.28e-05	151
chr1	8005448	8005534	1	1.63e-05	57
chr1	8026776	8027034	-1	0.00033821	-81
chr1	8061090	8061606	1	0.00192396	100
chr1	8203678	8203850	-1	0.00166916	-57
chr1	8212794	8212880	-1	0.00210798	-53
chr1	8257686	8257772	-1	7.64e-05	-41
chr1	8264308	8264394	1	9.44e-05	10
chr1	8295870	8295956	1	7.78e-06	8
chr1	8297074	8297246	1	0.000118258	33
chr1	8315908	8315994	-1	1.36e-05	-38
chr1	8329926	8330786	-1	0.000171395	-69
chr1	8343342	8343858	1	0.000674431	183
chr1	8349620	8349878	-1	0.0022239	-73
chr1	8352028	8352114	1	0.000826948	57
chr1	8354436	8354608	1	0.000858456	6
chr1	8359768	8359940	-1	0.000337677	-67
chr1	8360886	8361144	-1	6.45e-05	-38
chr1	8362090	8362520	-1	1.16e-05	-66
chr1	8367164	8368024	1	1.7e-07	464
chr1	8377054	8377140	1	4.35e-05	9
chr1	8394856	8394942	1	0.000102744	6
chr1	8411970	8412486	1	0.000996524	95
chr1	8413690	8413776	-1	1.83e-05	-34
chr1	8450154	8450670	-1	0.00286579	-53
chr1	8552838	8553354	-1	0.00179366	-80
chr1	8555074	8555418	1	0.00281557	68
chr1	8684246	8684332	1	1.79e-05	3
chr1	8839820	8840250	1	1.71e-05	77
chr1	8844378	8844636	1	0.00104848	73
chr1	8862954	8863298	-1	0.00238754	-74
chr1	8865104	8865534	-1	0.000176989	-86
chr1	8866566	8866738	-1	7.33e-05	-94
chr1	8868716	8868802	1	0.000215994	7
chr1	8879294	8879466	-1	0.000164375	-57
chr1	8882992	8883096	1	0.00048673	5
chr1	8883336	8883422	1	0.00089149	9
chr1	8888066	8888152	-1	0.000252313	-76
chr1	8889786	8889958	1	2.36e-05	11
chr1	8891506	8891678	-1	0.00024122	-28
chr1	8891936	8892022	-1	0.000525298	-34
chr1	8895204	8895290	1	0.000171664	7
chr1	8896408	8896494	1	0.000778884	21
chr1	8900106	8900364	1	0.000167661	44
chr1	8987998	8988256	1	0.00464868	65
chr1	9014142	9014830	-1	0.000391028	-64
chr1	9119492	9119664	1	0.000363893	57
chr1	9120438	9120868	-1	0.00175071	-56
chr1	9163782	9164298	1	1.95e-05	96
chr1	9181756	9182702	1	7.08e-05	1460
chr1	9190700	9191130	-1	0.000359002	-63
chr1	9207126	9207470	1	0.00782179	76
chr1	9245396	9245568	-1	0.00328301	-61
chr1	9247460	9247804	-1	3.62e-06	-84
chr1	9250986	9251416	1	0.00193369	96
chr1	9261822	9262080	-1	0.00288059	-72
chr1	9262682	9262854	-1	0.00463829	-54
chr1	9264316	9264918	-1	0.000240162	-98
chr1	9294674	9294846	1	0.00137953	79
chr1	9315486	9315744	1	0.00301353	62
chr1	9329332	9329418	-1	0.000163801	-53
chr1	9337932	9338018	1	3.13e-05	79
chr1	9342404	9342834	-1	0.00313365	-67
chr1	9362442	9362786	-1	4.05e-05	-77
chr1	9385748	9386006	-1	0.0028869	-63
chr1	9386694	9386780	1	0.00193285	52
chr1	9389618	9389704	-1	0.0012671	-21
chr1	9390994	9391166	-1	0.000237332	-47
chr1	9392112	9392198	-1	0.00200265	-36
chr1	9394606	9395466	-1	0.000943358	-52
chr1	9398132	9398218	1	0.00044949	76
chr1	9400712	9400798	-1	0.00276428	-59
chr1	9401314	9401400	-1	0.000154719	-45
chr1	9418084	9418170	-1	0.000128559	-39
chr1	9429350	9429436	-1	0.000157578	-33
chr1	9450162	9450936	1	3.35e-05	325
chr1	9472178	9472264	-1	2.68e-05	-38
chr1	9507352	9507524	-1	0.00011467	-21
chr1	9516382	9516468	-1	0.000151633	-34
chr1	9530744	9530830	1	6.1e-06	64
chr1	9535216	9535302	1	0.000154532	8
chr1	9535560	9535646	1	9.19e-05	7
chr1	9539430	9539946	-1	0.00285462	-60
chr1	9550524	9550696	1	2.05e-05	7
chr1	9593266	9594212	1	3.12e-06	205
chr1	9601866	9602382	-1	0.000144651	-76
chr1	9630848	9631278	-1	0.000332823	-51
chr1	9671354	9671870	1	6.61e-09	118
chr1	9687178	9687522	1	2.85e-05	129
chr1	9693542	9693628	1	0.000624024	5
chr1	9694660	9694746	-1	0.000583689	-42
chr1	9696466	9696552	1	0.000365829	12
chr1	9698960	9699648	1	3.66e-06	215
chr1	9700938	9701110	-1	0.000446441	-40
chr1	9712204	9712290	1	0.00011116	5
chr1	9715558	9715644	-1	0.000216833	-72
chr1	9717020	9717364	1	0.000188634	92
chr1	9717536	9717794	1	0.00381245	98
chr1	9719170	9719514	1	0.00377051	224
chr1	9733618	9734134	-1	0.000103781	-100
chr1	9736886	9737488	1	8.67e-08	85
chr1	9807406	9807492	1	1.02e-05	29
chr1	9840344	9840602	1	0.0013646	81
chr1	9849030	9849288	-1	0.000165705	-68
chr1	9878528	9878872	-1	0.000461221	-61
chr1	9882140	9882828	-1	0.00189882	-56
chr1	9884806	9884978	-1	0.000529454	-52
chr1	9887300	9887386	1	0.000512532	56
chr1	9890568	9890654	1	0.000619392	43
chr1	9891170	9891772	1	0.00610159	146
chr1	9966592	9966678	1	3.14e-06	7
chr1	10083294	10083638	1	0.000931723	91
chr1	10088368	10088712	1	1.21e-05	7
chr1	10100408	10100494	1	6.7e-05	6
chr1	10210832	10211004	-1	4.28e-06	-34
chr1	10225022	10225108	-1	7.22e-05	-53
chr1	10233536	10233622	1	1.85e-06	4
chr1	10243082	10243168	-1	8.52e-05	-33
chr1	10417146	10417662	-1	7.52e-05	-58
chr1	10612710	10613140	-1	0.00325383	-68
chr1	10634382	10634898	1	0.000226517	86
chr1	10637306	10637478	1	0.000119456	33
chr1	10640144	10640402	1	0.00346388	95
chr1	10648314	10649346	-1	5.49e-06	-74
chr1	10653388	10653560	1	0.00046031	86
chr1	10653818	10654678	-1	8.67e-05	-86
chr1	10664396	10664654	-1	2.65e-05	-56
chr1	10665342	10665772	-1	0.00297726	-68
chr1	10667234	10667406	-1	0.00155104	-49
chr1	10738098	10738184	-1	0.0004711	-50
chr1	10739474	10739646	-1	0.000160834	-67
chr1	10741710	10741796	1	1.7e-05	12
chr1	10744204	10744978	1	4.2e-05	525
chr1	10756674	10756932	-1	0.0062523	-67
chr1	10758824	10759254	1	8.96e-05	90
chr1	10820056	10820228	1	0.000172959	79
chr1	10824786	10825732	1	5.35e-07	221
chr1	10830978	10831236	1	0.00448968	52
chr1	10832956	10833300	-1	5.54e-06	-56
chr1	10842674	10842846	-1	0.000199596	-58
chr1	10904594	10904852	1	1.76e-05	70
chr1	10905428	10905540	1	3.05e-05	9
chr1	10909668	10909926	1	0.00411332	161
chr1	10928674	10929018	-1	0.000607446	-75
chr1	10991540	10991970	-1	0.000561522	-57
chr1	10997216	10997302	1	1.14e-05	9
chr1	11007794	11007880	1	1.79e-05	7
chr1	11026026	11026456	1	0.0126484	87
chr1	11058104	11058276	-1	1.08e-05	-75
chr1	11059824	11060684	-1	1.79e-06	-38
chr1	11061200	11061286	-1	0.000121931	-32
chr1	11064038	11064124	1	0.00108793	74
chr1	11071434	11071950	-1	0.000190453	-69
chr1	11082872	11083302	-1	1.65e-05	-55
chr1	11113488	11113574	1	7.74e-06	7
chr1	11189684	11190114	-1	0.000683551	-58
chr1	11194414	11194586	-1	0.000122639	-52
chr1	11202498	11202584	1	0.000211325	4
chr1	11229588	11229674	1	0.000146195	18
chr1	11237844	11238102	-1	0.00450722	-56
chr1	11238618	11238704	-1	7.21e-07	-29
chr1	11256076	11256334	-1	9.96e-06	-49
chr1	11262440	11262612	-1	0.0002259	-37
chr1	11264762	11264848	1	0.000251101	8
chr1	11287294	11287380	-1	1.99e-05	-51
chr1	11294260	11294346	1	2.06e-06	13
chr1	11298990	11299506	1	0.00050799	105
chr1	11332186	11332272	1	5.35e-06	48
chr1	11341302	11341388	-1	9.03e-06	-27
chr1	11350332	11350418	1	0.00244036	65
chr1	11433666	11434182	-1	0.000257929	-56
chr1	11449146	11449662	-1	0.000858115	-56
chr1	11480106	11480536	-1	2.8e-06	-95
chr1	11483804	11484062	1	0.0027867	74
chr1	11504358	11504874	-1	1.07e-05	-52
chr1	11520440	11520870	-1	0.00247163	-62
chr1	11522246	11522418	1	0.000303663	42
chr1	11526030	11526460	1	0.000909145	72
chr1	11527062	11527406	-1	0.00020135	-38
chr1	11528782	11528868	-1	0.00163619	-59
chr1	11530674	11531018	-1	0.000103121	-61
chr1	11555184	11555700	1	5.8e-07	95
chr1	11558968	11559570	1	2.1e-06	360
chr1	11564042	11564128	1	0.000164634	36
chr1	11569890	11570234	1	0.00403949	96
chr1	11598270	11598442	1	0.000954213	79
chr1	11635852	11636368	-1	1.91e-05	-70
chr1	11646258	11646774	-1	0.00127874	-61
chr1	11658298	11658556	1	0.00275958	70
chr1	11674724	11675498	-1	3.06e-05	-69
chr1	11700180	11700524	1	5.2e-05	10
chr1	11703706	11704050	-1	0.000626567	-73
chr1	11705856	11706028	-1	0.000340161	-34
chr1	11708694	11708952	1	0.00528542	184
chr1	11780418	11780934	1	0.00762373	51
chr1	11789190	11789792	-1	2.62e-05	-60
chr1	11790566	11790738	-1	0.0023829	-61
chr1	11790910	11791426	1	7.14e-05	72
chr1	11791512	11791856	-1	0.000907478	-30
chr1	11795382	11795898	-1	0.000471372	-57
chr1	11800026	11800542	-1	0.00454936	-62
chr1	11805530	11806218	1	1.55e-07	263
chr1	11829352	11829782	1	0.000106769	76
chr1	11830642	11830814	1	0.000289957	9
chr1	11832534	11832620	-1	0.000444036	-52
chr1	11859538	11859882	1	0.000111768	133
chr1	11878458	11878630	-1	0.00855123	-88
chr1	11878888	11879318	-1	0.00375722	-64
chr1	11883704	11884048	-1	0.00179173	-51
chr1	11885166	11885596	1	0.000121838	34
chr1	11885854	11886026	-1	0.00289945	-65
chr1	11886198	11886456	-1	6.81e-05	-55
chr1	11888520	11888692	1	0.00616047	107
chr1	11899012	11899184	-1	2.99e-05	-61
chr1	11925070	11926446	-1	5.8e-05	-56
chr1	11931778	11931950	1	1.37e-05	6
chr1	11940378	11940808	1	0.00345178	58
chr1	11947946	11948204	-1	2.39e-05	-63
chr1	11983808	11983894	-1	0.000187244	-53
chr1	11986732	11986904	-1	1.12e-05	-30
chr1	11990430	11990860	1	4.35e-07	90
chr1	12009522	12009952	-1	2.34e-05	-55
chr1	12012102	12012618	1	0.000622519	212
chr1	12022766	12023024	-1	8.03e-06	-80
chr1	12038590	12038934	-1	0.0033171	-71
chr1	12046932	12047190	-1	0.00151921	-63
chr1	12063186	12063616	-1	0.000274623	-57
chr1	12064218	12064820	-1	2.38e-05	-58
chr1	12065422	12065508	1	0.00107148	6
chr1	12076516	12076774	-1	0.00039922	-46
chr1	12078150	12078236	1	0.000485162	56
chr1	12078666	12078838	1	0.000153399	78
chr1	12080902	12081074	1	0.00354848	88
chr1	12125106	12125536	-1	0.00770088	-53
chr1	12126912	12127170	-1	2.11e-06	-60
chr1	12141274	12141360	-1	5.93e-07	-58
chr1	12146090	12146778	1	0.000485445	107
chr1	12149874	12150304	-1	0.000969706	-56
chr1	12164494	12164580	-1	0.000460258	-31
chr1	12165268	12165870	1	3.28e-06	145
chr1	12172062	12172492	1	0.000291462	63
chr1	12176448	12176620	1	7.76e-06	65
chr1	12179716	12179888	1	0.00196026	116
chr1	12183930	12184446	1	0.00197182	62
chr1	12186596	12186768	1	5.47e-06	68
chr1	12188746	12189606	1	0.000200459	77
chr1	12201388	12201474	1	0.00019229	24
chr1	12201990	12202420	-1	0.000116731	-76
chr1	12206806	12207666	1	3.26e-07	1022
chr1	12216094	12216438	-1	0.00037133	-56
chr1	12230370	12230456	-1	7.58e-06	-52
chr1	12277412	12277498	-1	1.92e-05	-37
chr1	12284292	12284980	1	1.28e-05	189
chr1	12480716	12481060	1	0.00338359	68
chr1	12507462	12507548	1	0.0137612	28
chr1	12507892	12508322	1	6.39e-07	159
chr1	12540572	12540916	1	0.000354588	70
chr1	12588044	12588388	1	0.000408648	74
chr1	12594580	12594924	-1	0.00027564	-32
chr1	12595870	12596042	1	9.49e-06	61
chr1	12596644	12597074	1	0.00421162	81
chr1	12599310	12599740	1	4.89e-05	108
chr1	12604470	12604728	1	0.00230017	85
chr1	12618144	12618746	1	4.51e-06	278
chr1	12618918	12619348	1	0.000144525	56
chr1	12640160	12640246	-1	0.0217287	-14
chr1	12640332	12641020	1	2.63e-05	291
chr1	12745338	12745854	1	9.51e-05	52
chr1	12786360	12786532	1	2.5e-05	28
chr1	12851634	12852236	1	2.15e-06	151
chr1	12853182	12853268	-1	0.00232909	-15
chr1	12854128	12854214	1	2.33e-05	7
chr1	12855848	12855934	-1	0.00263097	-29
chr1	12858944	12859632	-1	0.000105418	-46
chr1	12861266	12861352	-1	0.000991442	-30
chr1	12861782	12861868	1	0.00200842	9
chr1	12866512	12866674	1	1.58e-05	12
chr1	12872962	12873048	1	0.000244119	5
chr1	12873220	12873306	1	0.00129306	8
chr1	12875112	12875198	1	0.00153143	10
chr1	12875628	12875714	1	0.000477111	10
chr1	12876660	12877176	1	3.89e-05	7
chr1	12877434	12877520	1	0.00156113	16
chr1	12880100	12880444	1	0.000231882	9
chr1	12890334	12890592	1	0.000926612	8
chr1	12893602	12894032	1	0.00166971	6
chr1	12894290	12894806	1	0.00193396	11
chr1	12895924	12896354	1	0.000295195	12
chr1	12897701	12897817	1	0.00220041	7
chr1	12898822	12899247	1	7.01e-05	9
chr1	12899652	12899794	1	0.00548093	7
chr1	12900138	12900224	1	0.00319253	5
chr1	12900482	12900689	1	0.00114895	5
chr1	12901013	12901170	1	1.56e-06	8
chr1	12901600	12902202	1	0.00174419	9
chr1	12903234	12903660	1	0.00420138	6
chr1	12905900	12906674	1	5.23e-05	6
chr1	12907878	12907964	1	0.00562194	6
chr1	12910403	12910716	1	5.62e-05	6
chr1	12912178	12912264	1	0.000289581	14
chr1	12912608	12912952	1	0.000125716	10
chr1	12917464	12917682	1	0.00568075	10
chr1	12924100	12924476	1	2.25e-05	10
chr1	12924906	12925164	1	0.00461061	9
chr1	12925594	12926151	1	0.00346506	9
chr1	12926567	12926942	1	0.00232493	13
chr1	12931270	12931356	1	0.000617192	10
chr1	12931958	12932130	1	0.000590464	13
chr1	12935364	12936143	1	6.45e-06	8
chr1	12936724	12937204	1	6.9e-08	15
chr1	12937634	12937806	1	0.0102687	10
chr1	12939354	12940085	1	0.000413821	10
chr1	12941017	12941246	1	0.00780502	9
chr1	12942700	12943088	1	0.00147623	9
chr1	12945508	12945832	1	0.000124629	10
chr1	12947414	12947954	1	0.000273753	9
chr1	12948384	12948750	1	8.02e-06	8
chr1	12952410	12952741	1	0.00025321	8
chr1	13041694	13042245	1	3.39e-05	5
chr1	13057953	13058134	1	0.00378985	5
chr1	13071541	13071936	1	0.00107188	4
chr1	13076496	13076879	1	0.000186065	9
chr1	13105606	13106139	1	1.11e-05	12
chr1	13106538	13106968	1	0.00140133	6
chr1	13107184	13108358	1	7.85e-05	11
chr1	13109150	13109304	1	5.39e-05	7
chr1	13109906	13109996	1	7.92e-05	6
chr1	13114227	13114751	1	0.000303201	7
chr1	13115330	13115496	1	0.000833594	9
chr1	13116528	13116700	1	0.00017222	7
chr1	13117474	13117589	1	0.000109185	8
chr1	13119457	13120469	1	0.000127031	10
chr1	13158238	13158324	1	0.00232645	7
chr1	13165107	13165473	1	0.0125909	4
chr1	13174748	13174922	1	2.96e-05	5
chr1	13176556	13176642	1	0.00132831	9
chr1	13177778	13178620	1	0.00243912	6
chr1	13179136	13179910	1	0.000401787	5
chr1	13180598	13181028	1	0.00464735	6
chr1	13181544	13181722	1	0.00286844	6
chr1	13183689	13184118	1	0.000149571	7
chr1	13184587	13185156	1	0.000964863	7
chr1	13189112	13189804	1	0.000255441	4
chr1	13191059	13191532	1	0.000758889	4
chr1	13191938	13192466	1	0.000280532	5
chr1	13193286	13193670	1	4.09e-06	4
chr1	13195820	13195974	1	0.00642565	7
chr1	13196379	13196633	1	0.000143659	5
chr1	13197540	13197798	1	0.00178841	8
chr1	13197970	13198314	1	0.000867189	7
chr1	13200549	13200722	1	0.00169818	5
chr1	13201935	13202021	1	0.000705166	4
chr1	13203388	13203560	1	0.00250741	4
chr1	13203732	13204302	1	0.000357278	8
chr1	13210179	13210526	1	0.00633498	5
chr1	13210956	13211156	1	0.00428834	5
chr1	13211608	13211988	1	0.00854987	1
chr1	13212848	13213229	1	0.00344536	5
chr1	13216460	13216595	1	0.00252244	6
chr1	13216824	13217578	1	4.93e-05	6
chr1	13219481	13220178	1	0.000158378	5
chr1	13221315	13221706	1	0.00061998	7
chr1	13223770	13223942	1	0.00187081	9
chr1	13433180	13433610	1	0.000818988	62
chr1	13439888	13440146	1	0.000576684	99
chr1	13513160	13513418	-1	0.00370107	-83
chr1	13517374	13517718	1	0.000469542	119
chr1	13523910	13524512	1	2.51e-05	80
chr1	13702962	13703048	1	5.25e-07	71
chr1	13805732	13806334	-1	5.07e-06	-53
chr1	13808914	13809258	1	0.000193037	84
chr1	13823362	13823878	1	0.00103563	220
chr1	13828952	13829038	1	0.00722361	64
chr1	13829468	13829726	1	0.00156911	68
chr1	14064592	14065366	1	3.24e-07	180
chr1	14138122	14138552	1	2.2e-05	62
chr1	14173554	14173640	-1	2.92e-06	-22
chr1	14190668	14191012	1	8.05e-06	96
chr1	14305220	14305736	1	6.33e-05	82
chr1	14346156	14346500	1	4.42e-05	74
chr1	14419944	14420374	1	0.00017971	151
chr1	14428802	14428974	1	1.72e-05	9
chr1	14441100	14441186	1	0.000125472	31
chr1	14462600	14463116	1	5.13e-06	97
chr1	14479886	14480316	1	0.000149339	173
chr1	14519016	14519188	1	0.000100453	17
chr1	14520564	14521424	1	0.000214604	306
chr1	14531314	14531400	-1	7.77e-05	-32
chr1	14557372	14557485	1	3.04e-05	5
chr1	14575432	14575518	-1	0.000182813	-21
chr1	14581280	14581366	-1	0.000199307	-35
chr1	14598996	14599340	-1	3.19e-06	-66
chr1	14627204	14627720	1	3.08e-05	220
chr1	14633912	14633998	1	0.000248268	12
chr1	14634944	14635460	-1	0.00487155	-48
chr1	14654552	14655068	1	0.000122481	121
chr1	14661776	14662206	1	0.000175024	61
chr1	14732984	14733672	1	0.000281591	400
chr1	14737026	14737370	-1	0.000197342	-56
chr1	14742186	14742616	1	5.57e-05	116
chr1	14755946	14756204	1	6.26e-05	104
chr1	14774780	14775210	1	0.0025215	63
chr1	14836884	14837001	1	7.61e-06	9
chr1	14843924	14844440	1	4.03e-07	135
chr1	14907220	14907994	1	8.62e-07	375
chr1	14913756	14913928	1	0.000461004	67
chr1	14924334	14924592	-1	2.8e-05	-27
chr1	14936804	14937148	-1	4.52e-05	-57
chr1	14967248	14967678	-1	0.000307924	-56
chr1	14994338	14994596	-1	0.00868578	-58
chr1	14996230	14996488	1	0.000576246	71
chr1	14997606	14998122	1	0.000972637	75
chr1	15015838	15016182	-1	0.00243013	-61
chr1	15046282	15047056	1	0.000152305	431
chr1	15047142	15047228	-1	0.0212568	-50
chr1	15048862	15049292	-1	0.00134434	-69
chr1	15053248	15053420	-1	0.00100057	-62
chr1	15059526	15059612	-1	4.36e-06	-74
chr1	15151460	15151804	1	0.00523409	94
chr1	15168574	15168918	1	0.00408003	65
chr1	15170208	15170294	-1	0.000215146	-17
chr1	15178550	15178980	1	0.00668984	111
chr1	15189644	15190160	-1	0.00303127	-51
chr1	15246920	15247436	1	0.00197597	82
chr1	15266098	15266528	1	0.00434433	64
chr1	15297058	15297316	1	0.00506291	84
chr1	15303164	15303594	1	0.000255212	146
chr1	15318214	15318300	1	3.09e-05	44
chr1	15352270	15353216	1	2.24e-06	173
chr1	15358462	15358892	-1	0.00184677	-56
chr1	15409890	15409976	-1	1.8e-05	-45
chr1	15410148	15410320	-1	8.17e-05	-27
chr1	15423478	15423822	1	0.000117717	83
chr1	15427348	15427434	1	0.0033775	52
chr1	15429756	15429842	-1	0.00022749	-66
chr1	15432766	15433282	1	3.47e-05	141
chr1	15438614	15438872	1	6.95e-05	132
chr1	15452546	15452718	1	0.00351636	72
chr1	15467338	15467768	-1	3.25e-05	-58
chr1	15500878	15500964	-1	1.24e-05	-33
chr1	15518422	15518508	-1	8.14e-05	-47
chr1	15539750	15540008	1	8.4e-06	80
chr1	15613366	15613452	1	0.000121599	5
chr1	15665654	15665740	1	2.04e-05	10
chr1	15684488	15684660	-1	1.18e-06	-30
chr1	15699796	15699882	1	4.49e-05	11
chr1	15702032	15702118	-1	0.000122502	-57
chr1	15717684	15718028	-1	0.00015141	-83
chr1	15735142	15735486	1	0.00501517	124
chr1	15739700	15740044	-1	0.00233531	-58
chr1	15740818	15741248	-1	0.00325636	-55
chr1	15765156	15765844	1	0.000182297	285
chr1	15796632	15797234	1	0.000185515	135
chr1	15798868	15799556	1	9.9e-09	192
chr1	15799986	15800588	1	8.67e-06	105
chr1	15836106	15836192	1	0.00288523	57
chr1	15934232	15935694	-1	0.00114963	-77
chr1	15946702	15947046	-1	0.00144517	-70
chr1	15950744	15950830	1	1.04e-05	34
chr1	15952808	15953152	1	0.00194047	98
chr1	15996926	15997098	1	9.99e-05	63
chr1	16001914	16002000	1	0.000333067	8
chr1	16028230	16028402	-1	0.000156402	-57
chr1	16032788	16033304	1	7.1e-05	97
chr1	16050074	16050246	-1	0.00034108	-30
chr1	16050676	16050762	-1	0.000553084	-39
chr1	16051880	16052396	-1	0.000750289	-51
chr1	16064350	16065640	-1	0.000322688	-59
chr1	16066672	16067704	1	0.000575298	83
chr1	16073552	16073982	-1	7.11e-05	-59
chr1	16075702	16076562	1	0.000146463	312
chr1	16088516	16088602	1	0.00105624	118
chr1	16112768	16113284	1	0.000249287	126
chr1	16138138	16138396	1	0.0035236	155
chr1	16139256	16139342	1	0.000431797	54
chr1	16145620	16145878	1	0.000233817	218
chr1	16148544	16148802	-1	0.00266356	-88
chr1	16150350	16150522	1	1.66e-05	83
chr1	16152500	16153016	1	0.000201003	142
chr1	16164368	16164884	1	0.00126818	159
chr1	16166002	16166088	-1	0.000313393	-24
chr1	16173398	16174344	1	4.95e-05	127
chr1	16181740	16182170	1	0.00129918	195
chr1	16183460	16183804	-1	0.000227956	-52
chr1	16184492	16185180	1	0.00018462	482
chr1	16186814	16186900	1	0.00222654	54
chr1	16188190	16188620	1	0.00055621	98
chr1	16198940	16199198	1	0.000202573	100
chr1	16232050	16232480	1	0.000226548	137
chr1	16352364	16352536	1	0.00491751	85
chr1	16363888	16363974	-1	0.000144575	-16
chr1	16393300	16393730	-1	1.16e-05	-94
chr1	16396654	16396998	1	0.00181831	154
chr1	16440600	16440772	1	0.000687663	124
chr1	16451780	16452296	1	0.00405438	69
chr1	16492630	16493345	1	1.27e-05	169
chr1	16509572	16509658	1	4.19e-05	9
chr1	16510776	16510862	1	0.000154149	6
chr1	16511453	16511550	1	1.9e-05	5
chr1	16515334	16515506	1	8e-06	12
chr1	16529180	16529266	1	0.000402989	10
chr1	16545864	16546036	-1	0.000111455	-29
chr1	16555668	16555918	1	3.55e-06	9
chr1	16556579	16556700	1	5.28e-05	9
chr1	16557388	16557773	1	0.00433235	38
chr1	16558361	16558659	1	0.00199272	8
chr1	16560329	16561086	1	0.000471429	9
chr1	16561258	16561344	1	0.01069	11
chr1	16564918	16565042	1	0.000747751	6
chr1	16568052	16568224	1	2.4e-06	10
chr1	16568568	16569686	1	2.25e-05	13
chr1	16571922	16572057	1	1.14e-05	4
chr1	16573096	16573212	1	1.59e-06	5
chr1	16587746	16587832	-1	0.000206156	-30
chr1	16592906	16593161	1	4.41e-05	10
chr1	16593889	16594310	1	4.04e-05	7
chr1	16594852	16594970	1	0.00146732	17
chr1	16596088	16596402	1	0.000150591	7
chr1	16597464	16597649	1	3.23e-05	10
chr1	16601073	16602452	1	9.35e-05	13
chr1	16603484	16604344	1	1.13e-05	11
chr1	16606838	16607096	-1	0.0015478	-42
chr1	16607784	16608300	-1	0.001907	-65
chr1	16608472	16609160	-1	1.32e-05	-98
chr1	16609418	16609504	-1	0.000230023	-41
chr1	16612256	16612342	-1	0.00571282	-52
chr1	16612514	16612686	-1	0.00277751	-59
chr1	16613374	16613804	1	2.27e-05	261
chr1	16615094	16615696	-1	0.000898987	-65
chr1	16627879	16628230	1	0.000185587	12
chr1	16628488	16628918	-1	0.000479951	-159
chr1	16636080	16636596	-1	6.83e-05	-77
chr1	16638574	16638918	-1	0.00077687	-78
chr1	16639864	16640380	-1	0.000664807	-36
chr1	16640896	16640982	-1	0.00648164	-15
chr1	16641154	16641842	-1	0.00066012	-40
chr1	16642358	16642498	1	0.0145015	8
chr1	16647646	16647990	-1	0.000733281	-40
chr1	16648420	16648678	-1	0.0031204	-68
chr1	16649452	16649882	-1	5.46e-05	-64
chr1	16653322	16653494	1	0.00226468	7
chr1	16654870	16655165	1	0.000956536	13
chr1	16656047	16656292	1	0.000155575	6
chr1	16657619	16658030	1	0.000251433	12
chr1	16664244	16664594	1	0.00122597	12
chr1	16678348	16678434	-1	0.000647618	-28
chr1	16684069	16684282	1	6.52e-05	4
chr1	16686576	16687034	1	0.000136409	11
chr1	16727712	16728228	-1	0.00280436	-64
chr1	16729002	16729316	1	0.000607158	9
chr1	16729547	16729690	1	0.000427589	10
chr1	16732012	16732270	1	0.0038811	6
chr1	16735224	16735515	1	6.99e-07	8
chr1	16749567	16749986	1	0.000685576	13
chr1	16752875	16753168	1	0.000425469	8
chr1	16753942	16754200	1	0.000111452	7
chr1	16754458	16754610	1	5.7e-05	9
chr1	16756957	16757296	1	0.000186087	12
chr1	16760908	16761080	1	0.00344812	36
chr1	16767874	16768122	1	0.000172028	8
chr1	16781032	16781548	1	0.000259721	13
chr1	16783096	16783377	1	0.00149594	5
chr1	16784587	16784816	1	0.000721052	7
chr1	16784988	16785098	1	0.00224513	13
chr1	16785848	16786106	1	2.15e-05	10
chr1	16787138	16787383	1	0.000174357	13
chr1	16788514	16788827	1	0.00166776	8
chr1	16789018	16789374	1	0.000404286	8
chr1	16789718	16789828	1	0.000184133	7
chr1	16793416	16793502	1	0.00322017	6
chr1	16794362	16794706	1	0.000158235	9
chr1	16795308	16795652	1	0.000451004	12
chr1	16795996	16796082	1	0.0014067	4
chr1	16797630	16797888	1	0.000560018	10
chr1	16849507	16850453	1	1.5e-05	11
chr1	16850797	16851145	1	0.00683296	10
chr1	16855699	16855785	1	0.000310846	8
chr1	16857540	16857677	1	1.71e-05	12
chr1	16858193	16858451	1	1.33e-05	10
chr1	16863611	16863697	1	0.000237544	8
chr1	16867825	16868007	1	0.000305645	7
chr1	16878575	16878747	1	0.000309105	11
chr1	16879091	16879177	-1	0.000490474	-22
chr1	16882359	16882445	-1	0.000335497	-10
chr1	16895517	16895775	1	0.000292267	32
chr1	16905751	16905837	-1	0.000363163	-34
chr1	16909311	16909449	1	7.16e-05	6
chr1	16922693	16923123	1	0.000126372	98
chr1	16925445	16926133	1	1.51e-09	356
chr1	16968359	16968617	1	0.000233254	83
chr1	16969133	16969391	1	0.000870452	48
chr1	16969649	16970423	-1	7.52e-05	-79
chr1	16985903	16986333	-1	0.00272649	-61
chr1	16986935	16987021	-1	5.41e-05	-42
chr1	17002587	17002759	1	0.00306879	74
chr1	17011187	17011273	1	1.32e-05	66
chr1	17026925	17027011	1	4.46e-05	19
chr1	17082395	17083255	-1	2.66e-05	-48
chr1	17193335	17193765	1	0.000418758	95
chr1	17217845	17217931	-1	0.000304394	-35
chr1	17218705	17218791	-1	0.000374419	-36
chr1	17220855	17221715	-1	0.000778641	-39
chr1	17237539	17237711	1	0.00448637	63
chr1	17250955	17251127	1	0.000691514	49
chr1	17254223	17254739	1	0.000380379	68
chr1	17261447	17262049	1	2.66e-06	115
chr1	17274347	17274605	1	0.00449498	71
chr1	17277701	17278045	1	0.000432214	149
chr1	17292751	17292869	1	0.000203256	11
chr1	17301867	17302039	-1	0.000138635	-48
chr1	17307371	17307801	1	0.00856637	67
chr1	17309521	17310295	1	0.000254472	416
chr1	17350457	17350715	-1	7.38e-05	-49
chr1	17371699	17371957	1	0.003417	119
chr1	17382793	17383223	-1	0.0021127	-58
chr1	17383739	17383825	1	0.000755924	28
chr1	17385115	17385545	-1	0.000849163	-34
chr1	17388899	17389157	1	0.000189259	128
chr1	17389329	17389501	-1	0.000133438	-71
chr1	17394747	17395091	1	6.7e-06	95
chr1	17397155	17397241	-1	0.000101458	-60
chr1	17406529	17406615	1	0.000181418	40
chr1	17409969	17410141	-1	0.000194106	-65
chr1	17426137	17426567	-1	6.47e-05	-59
chr1	17443251	17444025	1	7.03e-09	134
chr1	17492099	17492443	1	0.00339447	74
chr1	17494163	17494679	1	0.00175355	64
chr1	17531315	17531745	1	0.000222436	80
chr1	17569499	17570015	1	2.87e-06	134
chr1	17581883	17582571	1	0.000119033	126
chr1	17633397	17633913	1	8.1e-05	63
chr1	17636923	17637095	-1	2.52e-05	-66
chr1	17657133	17657219	-1	0.000104166	-60
chr1	17669517	17669947	1	0.000121933	69
chr1	17675279	17675795	-1	7.57e-05	-93
chr1	17676397	17676483	-1	0.000817739	-73
chr1	17682073	17682245	-1	6.03e-05	-44
chr1	17775899	17776329	1	4.62e-06	78
chr1	17822855	17823285	-1	0.000127672	-54
chr1	17846247	17846419	-1	0.00765368	-69
chr1	17851579	17852181	-1	0.000148567	-76
chr1	17874111	17875229	1	3.03e-05	117
chr1	17891053	17891225	-1	0.00240194	-73
chr1	17913155	17913671	1	0.000112974	133
chr1	17943083	17943599	1	4.36e-05	141
chr1	17957703	17958477	1	1.5e-05	229
chr1	17979547	17979633	-1	8.42e-05	-39
chr1	17984535	17985051	1	2.25e-05	85
chr1	17987373	17987631	1	0.000292859	43
chr1	17994167	17994511	-1	0.000538356	-66
chr1	18021171	18021773	1	6.34e-06	124
chr1	18043273	18043359	-1	3.36e-05	-56
chr1	18071825	18072083	1	7.19e-05	42
chr1	18108719	18108891	-1	3.97e-05	-55
chr1	18135293	18135379	1	5.01e-05	5
chr1	18158771	18158857	1	0.0031106	84
chr1	18165651	18165909	1	0.00429725	105
chr1	18166597	18167027	-1	0.00607577	-63
chr1	18190935	18191279	1	1.34e-05	68
chr1	18192827	18193343	1	5.29e-05	147
chr1	18196955	18197471	1	0.000620739	66
chr1	18219143	18219229	-1	1.42e-05	-34
chr1	18238751	18238837	1	2.8e-05	50
chr1	18243911	18244427	-1	0.000447803	-57
chr1	18256381	18256553	-1	1.8e-05	-63
chr1	18275387	18275473	-1	3.28e-05	-67
chr1	18304197	18304541	1	4.95e-05	122
chr1	18306863	18307035	1	0.00381378	62
chr1	18307207	18307637	1	1.28e-06	89
chr1	18310991	18311507	-1	0.0045859	-62
chr1	18334985	18335243	-1	3.84e-05	-68
chr1	18336447	18337307	1	2.61e-05	202
chr1	18367235	18367407	-1	4.95e-06	-46
chr1	18393551	18393637	-1	1.29e-05	-19
chr1	18412127	18412815	1	0.000127213	359
chr1	18480755	18481529	1	1.51e-06	430
chr1	18481701	18481787	-1	0.003746	-58
chr1	18530463	18530549	1	5.55e-05	14
chr1	18584299	18584901	1	1.56e-05	78
chr1	18643381	18643467	-1	0.00163196	-54
chr1	18643639	18644155	-1	0.000316736	-67
chr1	18654905	18654991	1	5.26e-05	43
chr1	18668751	18668923	1	0.0062192	81
chr1	18675287	18675631	1	1.1e-05	119
chr1	18682339	18682425	1	0.000134057	32
chr1	18702549	18702635	1	0.000165937	50
chr1	18716911	18716997	-1	0.000172182	-34
chr1	18719921	18720265	1	0.000965894	126
chr1	18727919	18728005	-1	3.95e-05	-44
chr1	18751139	18751569	-1	0.000537508	-52
chr1	18783733	18784077	1	0.00103009	66
chr1	18797063	18797407	1	0.00117314	109
chr1	18814951	18815467	1	0.0041437	110
chr1	18818477	18818563	-1	0.000122285	-31
chr1	18824669	18825443	1	0.00158068	72
chr1	18854339	18854597	-1	0.000275937	-98
chr1	18877645	18878075	1	8.06e-05	67
chr1	18882719	18883063	-1	0.000519389	-62
chr1	18886073	18886589	1	5.97e-05	94
chr1	18888051	18888911	1	8.79e-09	646
chr1	18899317	18899747	1	0.000165093	86
chr1	18917119	18917205	-1	0.00455279	-73
chr1	18921075	18921419	-1	0.000471	-84
chr1	18922967	18923397	1	0.000842814	120
chr1	18951949	18952207	1	0.000967218	76
chr1	18955905	18956679	-1	2.55e-07	-63
chr1	18989187	18989273	-1	0.000149347	-34
chr1	18991939	18992025	-1	4.16e-05	-41
chr1	18998217	18998819	1	0.000321565	300
chr1	19009827	19010171	1	1.1e-05	84
chr1	19033993	19034767	1	8.78e-05	66
chr1	19035283	19035369	-1	9.69e-05	-53
chr1	19037347	19037433	-1	0.000292388	-43
chr1	19040443	19040529	-1	0.000183102	-47
chr1	19058675	19059105	1	0.00131361	119
chr1	19067533	19067877	1	0.00452204	106
chr1	19071059	19071231	-1	0.00409663	-64
chr1	19074843	19075187	-1	0.00185903	-58
chr1	19077251	19077337	-1	0.000356716	-57
chr1	19081637	19081895	1	0.00012	80
chr1	19084905	19084991	-1	0.000147246	-45
chr1	19095311	19095655	-1	0.00122029	-60
chr1	19103911	19104169	-1	3.46e-06	-58
chr1	19105717	19105889	-1	0.000113457	-52
chr1	19110963	19111221	-1	3.54e-05	-49
chr1	19112339	19112425	-1	0.000760592	-46
chr1	19115091	19115349	-1	2.41e-05	-52
chr1	19230503	19231019	1	0.000542796	125
chr1	19257421	19257765	1	0.00101408	78
chr1	19273847	19274277	-1	0.0013725	-54
chr1	19310999	19311515	-1	0.000291768	-55
chr1	19314697	19314783	-1	8.61e-05	-55
chr1	19326049	19326479	1	0.000179472	116
chr1	19342819	19343077	-1	0.00256095	-73
chr1	19343421	19344109	-1	0.0025353	-66
chr1	19344969	19345399	-1	5.12e-05	-69
chr1	19528751	19528923	1	7.3e-05	6
chr1	19566935	19567193	-1	2.48e-05	-42
chr1	19643991	19644077	-1	0.000165549	-47
chr1	19644249	19644593	-1	6.44e-05	-42
chr1	19657493	19658095	1	0.000170676	136
chr1	19664545	19664631	1	0.000236937	53
chr1	19664889	19665233	-1	2.7e-06	-52
chr1	19665491	19666265	-1	0.000130028	-90
chr1	19682519	19683035	1	0.000341762	63
chr1	19688195	19688281	1	0.000992196	100
chr1	19695419	19696021	-1	5.74e-05	-62
chr1	19698085	19698171	-1	2.55e-05	-63
chr1	19700665	19700751	-1	0.000117542	-63
chr1	19755275	19755533	1	7.15e-06	66
chr1	19779011	19779527	-1	0.000236893	-55
chr1	19785117	19785289	-1	2.5e-05	-45
chr1	19798447	19798533	-1	0.000129083	-45
chr1	19814615	19814959	-1	0.00189339	-67
chr1	19866731	19867161	1	0.00205363	68
chr1	19882641	19882985	-1	5.61e-05	-89
chr1	19902937	19903023	1	1.41e-05	5
chr1	19984035	19984379	1	0.000322326	89
chr1	20089213	20089557	1	0.00573377	73
chr1	20125935	20126537	1	0.00010503	109
chr1	20133503	20134019	1	3.81e-05	118
chr1	20152337	20152595	1	3.44e-05	108
chr1	20165495	20166011	-1	0.000377778	-56
chr1	20271275	20271791	1	8.59e-05	86
chr1	20314705	20314877	-1	3.44e-06	-47
chr1	20330787	20330873	-1	1.96e-05	-59
chr1	20348159	20348331	-1	0.00481895	-73
chr1	20361575	20362607	1	2.24e-05	88
chr1	20375507	20375851	1	0.00632412	74
chr1	20375937	20376023	-1	0.00927353	-17
chr1	20382387	20382473	1	6.51e-05	15
chr1	20411283	20411627	1	0.00148694	180
chr1	20426763	20427365	1	8.93e-05	178
chr1	20476385	20476643	1	1.9e-05	73
chr1	20484469	20484641	-1	2.31e-05	-72
chr1	20494445	20495047	1	0.00194397	108
chr1	20552581	20554129	-1	5.9e-05	-63
chr1	20555849	20556107	1	0.000192391	145
chr1	20640387	20640731	-1	4.49e-06	-65
chr1	20646665	20646837	1	0.000115428	5
chr1	20652599	20652857	-1	0.000473399	-68
chr1	20655781	20655867	-1	0.00147452	-74
chr1	20672293	20672723	-1	0.00116337	-47
chr1	20682527	20682871	-1	5.98e-06	-69
chr1	20684075	20684419	1	0.00418519	80
chr1	20698781	20698867	1	0.00113112	31
chr1	20701619	20701877	-1	0.00014794	-61
chr1	20709531	20709703	-1	4.41e-05	-60
chr1	20709875	20710391	1	9.69e-05	96
chr1	20720711	20721141	-1	4.77e-07	-66
chr1	20724151	20724409	1	1.64e-06	178
chr1	20725355	20725871	-1	0.000109568	-71
chr1	20730343	20730429	-1	0.000134107	-36
chr1	20732321	20732665	1	0.00570846	91
chr1	20732923	20733697	1	1.18e-06	519
chr1	20733869	20733955	1	0.00318163	17
chr1	20814709	20814795	1	3.27e-06	7
chr1	20883767	20884283	1	0.000456991	123
chr1	21176855	21177027	1	0.000131165	70
chr1	21181843	21181929	1	3.9e-05	5
chr1	21209019	21209105	-1	6.44e-05	-22
chr1	21221747	21222263	-1	0.00126097	-60
chr1	21257867	21258297	1	0.00625665	92
chr1	21266123	21266467	1	1.99e-05	84
chr1	21267413	21267499	-1	0.000600349	-53
chr1	21270165	21270337	1	0.000116585	79
chr1	21270681	21270767	1	0.00785108	44
chr1	21313681	21314111	1	0.000779962	76
chr1	21317379	21317465	1	0.000501525	44
chr1	21318583	21318669	1	0.00295493	77
chr1	21324431	21325377	1	8.26e-05	228
chr1	21428663	21429179	-1	0.000188481	-99
chr1	21466589	21466761	1	0.000352024	24
chr1	21471233	21471319	-1	0.000412671	-30
chr1	21482241	21482430	1	4.36e-05	9
chr1	21482671	21482757	1	2.62e-05	9
chr1	21484477	21484563	1	0.000310431	11
chr1	21496775	21497119	1	0.00603337	58
chr1	21502537	21502623	-1	0.000329833	-26
chr1	21503913	21504085	-1	2.31e-06	-50
chr1	21516125	21516211	-1	0.000423432	-59
chr1	21537453	21537625	-1	0.000163767	-56
chr1	21547085	21547171	-1	6.7e-05	-40
chr1	21554825	21554911	-1	0.000300333	-8
chr1	21561275	21561533	-1	1.21e-05	-51
chr1	21575981	21576153	-1	0.000142876	-50
chr1	21592579	21592837	1	2.69e-05	96
chr1	21596621	21596879	1	0.00300261	133
chr1	21603673	21603845	-1	0.00203295	-74
chr1	21606597	21606683	-1	0.000222289	-59
chr1	21607887	21608059	-1	8.06e-05	-51
chr1	21621647	21621905	-1	0.00206642	-75
chr1	21622077	21622163	-1	0.0107491	-79
chr1	21626205	21626291	-1	5.09e-05	-68
chr1	21638675	21639105	1	1.61e-05	114
chr1	21642459	21642803	1	0.000187785	100
chr1	21648049	21648393	-1	2.04e-05	-68
chr1	21667055	21667399	-1	0.00273752	-57
chr1	21719257	21719343	1	9.16e-06	7
chr1	21729147	21729233	1	4.67e-06	16
chr1	21829509	21829595	1	0.00362016	84
chr1	21833895	21834239	1	0.000263477	221
chr1	21834583	21834669	-1	0.000240021	-69
chr1	21835357	21835443	-1	0.000837048	-39
chr1	21840947	21841033	-1	0.000214332	-55
chr1	21842495	21843269	1	6.38e-06	478
chr1	21844473	21844559	-1	0.00156479	-25
chr1	21845849	21846365	-1	0.000414949	-49
chr1	21855567	21855911	1	0.000975775	83
chr1	21858491	21858921	-1	7.06e-05	-66
chr1	21872423	21872853	-1	0.000461504	-63
chr1	21876293	21876551	-1	0.00682803	-76
chr1	21885495	21885753	-1	0.00042759	-86
chr1	21892203	21892289	-1	0.000166284	-31
chr1	21895987	21896417	-1	0.000178045	-60
chr1	21902007	21902179	1	0.000845687	78
chr1	21902351	21902867	1	2.7e-05	171
chr1	21931075	21931763	1	8.14e-06	128
chr1	21939503	21940019	1	0.000322713	100
chr1	21955499	21956359	1	7.3e-06	308
chr1	21956445	21956531	-1	0.0010018	-22
chr1	21974591	21975107	1	0.000619272	189
chr1	21978375	21978547	-1	0.000264059	-56
chr1	21979519	21979673	1	8.58e-05	9
chr1	21982073	21982159	-1	0.000159815	-26
chr1	21987061	21987147	1	0.00109578	18
chr1	21990157	21990297	1	0.00040878	10
chr1	21999445	21999875	1	0.00064749	84
chr1	22013377	22013469	1	5.33e-05	11
chr1	22025675	22026191	1	0.00125875	55
chr1	22046391	22046532	1	1.06e-05	8
chr1	22067127	22067213	-1	5.09e-05	-38
chr1	22119071	22119587	-1	0.0018527	-53
chr1	22120017	22120447	-1	0.00363163	-80
chr1	22129477	22129563	-1	0.00777486	-59
chr1	22129735	22129821	-1	0.00915887	-64
chr1	22132143	22132487	1	0.00433412	65
chr1	22137217	22137561	1	0.000111125	103
chr1	22140743	22141173	1	0.00357161	81
chr1	22177379	22177895	1	4.52e-05	144
chr1	22178153	22178411	-1	0.000353173	-32
chr1	22191655	22191741	-1	0.000664109	-52
chr1	22195353	22195439	1	0.000464015	5
chr1	22201373	22201545	1	0.000188542	7
chr1	22206619	22207307	1	0.000339448	86
chr1	22219519	22219949	1	7.9e-05	105
chr1	22221497	22221755	-1	0.00772506	-84
chr1	22229237	22229753	1	0.000351237	124
chr1	22234053	22234139	-1	8.47e-06	-50
chr1	22239213	22239299	-1	0.000211761	-53
chr1	22242137	22242223	-1	0.000324408	-34
chr1	22244545	22244975	-1	9.17e-05	-64
chr1	22256069	22256327	-1	0.00316859	-76
chr1	22260971	22261229	-1	0.000771865	-90
chr1	22285567	22285911	1	8.31e-05	157
chr1	22345079	22345595	-1	0.000628595	-102
chr1	22379307	22379823	1	0.000278012	132
chr1	22380253	22381199	1	7.15e-07	149
chr1	22386359	22386445	-1	0.000146691	-58
chr1	22408375	22408461	-1	8.22e-05	-39
chr1	22411815	22411901	-1	0.000124991	-23
chr1	22416803	22417319	1	1.04e-05	85
chr1	22579515	22579859	-1	0.000224621	-73
chr1	22611421	22611679	-1	0.000564448	-64
chr1	22619247	22619505	1	6.94e-05	87
chr1	22625955	22626213	-1	0.00394716	-66
chr1	22639629	22639715	1	0.00248048	63
chr1	22675147	22675319	-1	0.00010435	-72
chr1	22710579	22710665	-1	6.51e-05	-18
chr1	22711611	22711783	-1	0.00332313	-53
chr1	22739905	22739991	1	0.000163266	67
chr1	22747215	22747989	1	0.000686565	228
chr1	22750139	22750655	1	0.000145569	189
chr1	22757449	22757621	-1	0.000312231	-23
chr1	22761835	22762007	1	0.00876141	81
chr1	22766135	22766651	1	0.00113672	57
chr1	22796665	22797095	1	0.000859346	66
chr1	22813607	22814037	1	0.00259736	95
chr1	22817219	22818079	1	6.91e-06	534
chr1	22818165	22818251	-1	0.00894458	-59
chr1	22837429	22837687	1	0.00121948	81
chr1	22856607	22856951	1	0.00518506	113
chr1	22865465	22865809	1	0.000555155	141
chr1	22880257	22880515	1	0.00234219	96
chr1	22915775	22916291	-1	0.000915915	-59
chr1	22953443	22953701	-1	0.00150667	-61
chr1	22955077	22955421	-1	1.14e-05	-62
chr1	23010719	23011235	1	0.000190231	115
chr1	23019147	23019491	1	0.000342344	132
chr1	23019921	23020007	-1	3.22e-05	-62
chr1	23090699	23091129	-1	0.000148253	-51
chr1	23092247	23092763	-1	0.000364271	-64
chr1	23188825	23189255	1	0.000370547	66
chr1	23195963	23196307	-1	2.33e-05	-28
chr1	23204305	23204735	1	5.77e-05	92
chr1	23210927	23211443	1	0.000152892	52
chr1	23254787	23255303	1	9.15e-05	97
chr1	23362201	23362717	-1	8.7e-05	-65
chr1	23366243	23366329	-1	0.000458569	-17
chr1	23377165	23377853	1	0.000779999	163
chr1	23385335	23385851	-1	2.52e-06	-62
chr1	23387571	23387915	-1	0.000257043	-70
chr1	23399095	23399181	1	9.5e-06	12
chr1	23409329	23409415	1	0.000132915	9
chr1	23415435	23415693	1	4.69e-05	62
chr1	23442181	23442611	-1	0.00276747	-60
chr1	23455683	23455855	-1	0.00174824	-71
chr1	23483461	23483805	-1	0.0030804	-59
chr1	23497049	23497307	1	0.00021629	105
chr1	23528267	23528353	1	9.99e-05	87
chr1	23547875	23548133	1	1.71e-05	9
chr1	23553637	23554067	1	0.000206215	75
chr1	23554583	23554927	-1	0.000149244	-24
chr1	23557937	23558023	-1	0.000278981	-20
chr1	23558109	23558711	1	0.0015889	115
chr1	23559055	23559141	-1	6.18e-05	-62
chr1	23562323	23562753	1	0.000946382	89
chr1	23585543	23586059	1	0.00522759	135
chr1	23592251	23592939	1	1.91e-08	206
chr1	23661825	23662255	1	0.00196731	307
chr1	23668361	23668447	1	5.63e-05	6
chr1	23687195	23687281	-1	7.5e-05	-41
chr1	23808025	23808914	1	1.78e-05	469
chr1	23881125	23881297	1	3.19e-05	6
chr1	23927135	23927651	-1	0.000490524	-55
chr1	23939433	23939519	1	4.58e-05	7
chr1	23958955	23959213	-1	6.34e-06	-62
chr1	24022681	24022939	1	0.00667723	64
chr1	24029131	24029217	1	5.08e-05	40
chr1	24063359	24063875	-1	0.000106253	-66
chr1	24068003	24068261	-1	9.9e-06	-45
chr1	24091567	24091653	-1	0.00021339	-43
chr1	24097587	24097931	-1	0.0007038	-68
chr1	24098189	24098275	1	0.000131155	56
chr1	24104037	24104123	1	0.000144016	39
chr1	24110057	24110143	-1	0.000972145	-39
chr1	24111261	24111433	1	0.00188124	52
chr1	24113583	24114443	-1	0.000236043	-59
chr1	24121495	24121581	-1	0.000175262	-59
chr1	24129063	24129751	1	4.1e-07	195
chr1	24156239	24156755	-1	0.000297835	-52
chr1	24169139	24169655	-1	8.88e-05	-74
chr1	24207667	24207753	1	6.23e-05	13
chr1	24211709	24211881	1	4.57e-06	10
chr1	24236735	24237251	1	5.15e-05	138
chr1	24266147	24266663	1	0.000142163	58
chr1	24274403	24274919	1	0.000603792	123
chr1	24284895	24285755	1	0.00020025	166
chr1	24319467	24320327	1	0.000309109	100
chr1	24332281	24332711	1	0.000292039	63
chr1	24338559	24338817	1	0.00428545	84
chr1	24340021	24340279	1	0.00396364	86
chr1	24379753	24380097	1	0.00522043	62
chr1	24418453	24418625	-1	9.7e-05	-39
chr1	24418883	24419399	1	0.000665521	128
chr1	24440211	24440469	-1	0.0115546	-70
chr1	24452939	24453025	1	0.0007301	41
chr1	24485447	24485533	1	5.28e-06	9
chr1	24488113	24488543	1	0.000137312	107
chr1	24568007	24568179	1	0.00482359	95
chr1	24642999	24643343	1	0.00023393	71
chr1	24697523	24697953	1	0.00360701	65
chr1	24713089	24713519	1	0.00182884	105
chr1	24721861	24722291	1	0.000463048	66
chr1	24728999	24729171	-1	5.27e-05	-54
chr1	24745081	24745253	1	0.00301247	69
chr1	24861095	24861611	-1	0.000714964	-55
chr1	24902891	24903063	1	0.00473175	109
chr1	24905127	24905471	1	0.000253679	94
chr1	24909599	24909685	1	0.00473663	108
chr1	24910631	24911061	1	0.00155551	54
chr1	24917683	24917941	1	0.00158218	112
chr1	24926627	24926885	1	0.000388986	69
chr1	24929379	24930239	-1	1.37e-05	-70
chr1	24965929	24967133	1	1.6e-06	131
chr1	24972121	24972981	1	8.82e-09	330
chr1	24980807	24981323	1	1.01e-09	182
chr1	24998867	24999211	-1	0.00863714	-58
chr1	24999641	25000243	-1	0.000291838	-49
chr1	25013143	25013573	1	6.9e-07	153
chr1	25018905	25019163	1	8.08e-06	121
chr1	25020625	25021055	-1	0.00613461	-57
chr1	25022431	25022517	1	0.00142144	33
chr1	25039631	25040147	1	0.00420766	91
chr1	25042727	25043243	-1	0.00141967	-68
chr1	25050467	25050639	-1	0.00107942	-52
chr1	25050811	25050983	-1	0.00954441	-58
chr1	25053219	25053649	1	6.72e-10	290
chr1	25054595	25054681	-1	0.000179807	-18
chr1	25057261	25057433	1	0.000150142	64
chr1	25072139	25072569	-1	0.000307548	-71
chr1	25074117	25074633	1	6.48e-06	142
chr1	25086931	25087103	1	0.00222974	55
chr1	25097767	25097853	1	7.06e-05	46
chr1	25107227	25107657	1	0.00146157	87
chr1	25118063	25118149	-1	5.58e-06	-22
chr1	25130275	25130361	1	7.92e-06	7
chr1	25138187	25138273	1	9.6e-05	46
chr1	25168029	25168201	-1	0.000107795	-62
chr1	25194431	25195205	1	6.5e-07	447
chr1	25209825	25209997	-1	9.68e-05	-25
chr1	25232185	25232529	-1	0.000411308	-61
chr1	25272003	25272347	1	9.82e-05	12
chr1	25275271	25275368	1	3.18e-05	9
chr1	25277249	25277335	1	0.000260459	12
chr1	25283785	25283871	1	0.000116608	38
chr1	25305371	25305457	1	0.000457087	9
chr1	25317654	25317755	1	0.000423262	11
chr1	25322829	25322915	1	0.000380267	8
chr1	25431275	25431361	-1	8.12e-06	-56
chr1	25482359	25482789	1	0.00153394	111
chr1	25506697	25507127	1	0.00422708	56
chr1	25569047	25569305	1	0.000396493	97
chr1	25574121	25574723	-1	7.08e-05	-76
chr1	25588569	25588655	-1	3.69e-05	-34
chr1	25596997	25597083	1	1.24e-05	6
chr1	25617551	25618067	-1	0.000365813	-50
chr1	25618497	25618583	-1	0.00507931	-55
chr1	25619099	25619529	1	0.00170039	60
chr1	25647823	25647909	-1	6.88e-05	-70
chr1	25669409	25669495	1	0.000110735	49
chr1	25697359	25697961	1	1.05e-05	98
chr1	25733135	25733651	-1	0.00124782	-59
chr1	25748099	25749131	1	3.71e-05	526
chr1	25769255	25769771	-1	0.00173925	-52
chr1	25788175	25788347	-1	1.31e-05	-41
chr1	25820855	25821371	-1	5.86e-05	-80
chr1	25863683	25864199	-1	0.00218452	-58
chr1	25890601	25891031	1	0.000155869	77
chr1	25893009	25893095	1	4.5e-05	6
chr1	25898771	25898943	-1	0.000111277	-50
chr1	25908575	25908661	1	4.5e-05	13
chr1	25958627	25958713	1	0.000182896	70
chr1	25958971	25959057	1	0.000138882	16
chr1	25972043	25972129	1	6.4e-05	11
chr1	25998359	25998445	1	0.000153165	59
chr1	26002229	26002315	1	0.000164633	14
chr1	26018053	26018139	1	9.23e-05	10
chr1	26022267	26022611	1	6.92e-05	120
chr1	26030953	26031297	1	0.00371857	64
chr1	26156341	26156771	1	0.000667751	62
chr1	26182915	26183087	1	0.00385328	138
chr1	26233655	26234085	1	0.000173859	74
chr1	26268743	26269173	1	0.00014068	88
chr1	26284739	26284911	1	0.000975055	97
chr1	26291791	26292049	-1	0.000106938	-62
chr1	26295145	26295231	-1	0.000161283	-41
chr1	26321891	26322321	-1	0.000241441	-64
chr1	26328083	26328427	1	0.000715804	79
chr1	26329889	26330061	1	0.00285814	55
chr1	26330835	26331093	-1	0.000420169	-53
chr1	26331609	26331953	1	0.000960453	85
chr1	26340983	26341241	-1	0.0001663	-32
chr1	26346143	26346573	-1	0.00350886	-72
chr1	26349153	26349239	1	0.000101851	17
chr1	26352593	26352679	-1	9.44e-05	-33
chr1	26353539	26353797	1	0.00379638	99
chr1	26367385	26367815	-1	0.000736774	-60
chr1	26371943	26372459	1	0.000541578	135
chr1	26409267	26409611	1	1.25e-05	75
chr1	26530957	26531817	1	0.00105168	183
chr1	26545835	26546867	1	1.66e-05	176
chr1	26551769	26551855	-1	0.00370509	-70
chr1	26561401	26561659	-1	0.0067027	-61
chr1	26582729	26582815	1	1.46e-05	36
chr1	26620655	26621171	1	2.28e-06	107
chr1	26687219	26687305	1	5.98e-06	6
chr1	26695475	26695819	1	0.0022428	82
chr1	26731079	26731595	-1	3.23e-05	-78
chr1	26757395	26757481	-1	1.49e-05	-16
chr1	26771843	26772015	1	1.53e-05	83
chr1	26774939	26775111	-1	0.000238995	-42
chr1	26780099	26780615	-1	0.000121524	-77
chr1	26782077	26782163	-1	8.58e-05	-18
chr1	26804781	26804867	-1	3.94e-05	-20
chr1	26849157	26849673	1	1.79e-05	272
chr1	26850103	26850189	-1	0.000468446	-58
chr1	26852855	26853371	1	2.55e-05	67
chr1	26855091	26855435	1	0.000871511	124
chr1	26855865	26855951	-1	0.000433666	-51
chr1	26861111	26861713	1	0.000140113	201
chr1	26862229	26862573	-1	0.000695914	-56
chr1	26863433	26863605	-1	0.000311175	-69
chr1	26864293	26864551	-1	0.00137838	-76
chr1	26909873	26909959	-1	4.04e-05	-40
chr1	26938769	26938855	-1	0.00014313	-64
chr1	26942725	26943155	-1	0.00186197	-69
chr1	26963193	26963279	1	9.1e-05	6
chr1	26971535	26972051	1	0.000434137	88
chr1	26982285	26982371	1	0.000124573	6
chr1	26994153	26994497	-1	4.5e-05	-67
chr1	26997765	26997937	1	0.0002343	66
chr1	26999399	26999829	1	0.00201353	111
chr1	27002065	27002237	-1	0.000872071	-92
chr1	27010923	27011525	1	0.000674618	162
chr1	27011869	27012815	-1	0.000204615	-75
chr1	27063383	27063899	-1	0.000133912	-50
chr1	27074133	27074649	1	7.66e-06	133
chr1	27118079	27118595	1	0.000795037	72
chr1	27152737	27152909	-1	0.00340001	-44
chr1	27177075	27177419	-1	0.00285386	-61
chr1	27247165	27247595	1	0.00170778	73
chr1	27321985	27322243	1	0.00700751	77
chr1	27324479	27325511	-1	9.41e-05	-50
chr1	27335831	27336433	-1	3.76e-07	-101
chr1	27336691	27336777	-1	0.0148501	-53
chr1	27342625	27343399	1	1.69e-06	381
chr1	27347699	27348301	-1	6.96e-05	-71
chr1	27358965	27359309	-1	0.00132234	-67
chr1	27361717	27362577	-1	7.67e-05	-75
chr1	27363437	27363695	-1	0.00124258	-76
chr1	27381755	27382271	-1	0.000343025	-52
chr1	27391559	27391989	1	2.98e-07	109
chr1	27392247	27392505	1	0.00174885	53
chr1	27393107	27393279	-1	8.46e-05	-29
chr1	27394139	27394225	-1	0.00405667	-76
chr1	27396633	27396719	1	0.000152383	45
chr1	27401535	27401879	1	0.000670425	81
chr1	27410135	27410221	-1	1.31e-05	-30
chr1	27513851	27514367	-1	0.00286736	-50
chr1	27521591	27521677	-1	0.0135197	-49
chr1	27521849	27522107	-1	9.96e-05	-66
chr1	27528385	27528643	-1	0.00015092	-81
chr1	27540253	27540683	1	0.000384444	104
chr1	27542575	27543435	1	1.02e-06	550
chr1	27545929	27546273	1	0.00938748	110
chr1	27547907	27548165	-1	0.000881509	-69
chr1	27549025	27549369	-1	1.37e-05	-81
chr1	27550659	27550917	-1	0.000192368	-56
chr1	27554529	27554701	1	5.56e-05	72
chr1	27562785	27563129	-1	2.75e-05	-83
chr1	27563301	27563387	-1	0.00238571	-49
chr1	27565451	27565537	-1	0.000646063	-34
chr1	27566741	27566999	-1	0.000116051	-53
chr1	27567515	27568031	-1	0.00144219	-58
chr1	27572675	27573191	-1	9.84e-05	-57
chr1	27576889	27577319	-1	0.00953205	-56
chr1	27582737	27582823	-1	0.000441806	-40
chr1	27587381	27587553	-1	0.000159401	-61
chr1	27593315	27593659	-1	0.000195024	-69
chr1	27597013	27597185	-1	2.8e-05	-48
chr1	27615159	27615503	-1	0.000113889	-58
chr1	27624791	27625737	1	8.54e-05	218
chr1	27636659	27637003	1	2e-05	120
chr1	27654203	27654289	1	0.000156567	14
chr1	27656353	27656783	1	0.00111763	106
chr1	27671919	27672693	1	0.000131932	229
chr1	27686883	27687227	-1	0.00467575	-63
chr1	27697633	27697719	-1	6.2e-05	-36
chr1	27725927	27726443	-1	0.00235934	-65
chr1	27868515	27868859	1	2.95e-07	96
chr1	27875137	27875567	1	0.00526264	117
chr1	27882103	27882361	1	2.28e-06	116
chr1	27941701	27942131	-1	0.0015047	-56
chr1	27954515	27955031	-1	0.00116036	-59
chr1	27958643	27958729	-1	0.00458242	-129
chr1	28044127	28044213	-1	6.76e-05	-22
chr1	28092201	28092545	1	1.65e-05	8
chr1	28112669	28113185	1	0.000538033	166
chr1	28113357	28113443	-1	0.0122716	-24
chr1	28116281	28116367	-1	0.000175544	-45
chr1	28125225	28125311	-1	1.94e-05	-27
chr1	28136749	28136921	1	0.00208443	60
chr1	28152745	28152831	1	1.48e-06	8
chr1	28171321	28171665	1	2.81e-06	68
chr1	28241411	28242357	1	1.09e-05	120
chr1	28247173	28247603	1	0.00341314	57
chr1	28260073	28260159	1	0.00341077	26
chr1	28260589	28260675	1	0.00952429	83
chr1	28260847	28261105	1	1.91e-05	46
chr1	28292437	28293097	1	7.52e-06	37
chr1	28318811	28318897	1	6.51e-05	7
chr1	28331797	28331883	-1	0.000492817	-23
chr1	28333173	28333345	-1	0.000221071	-36
chr1	28337903	28337989	1	0.000713004	7
chr1	28349943	28350029	-1	0.000606927	-24
chr1	28350201	28350287	-1	4.61e-05	-31
chr1	28352179	28352609	1	0.000200187	132
chr1	28352781	28352867	1	0.0129756	16
[truncated: 82,335 more rows]
