# Supplementary material for: Correcting signal biases and detecting regulatory elements in STARR-seq data
Source: HighWire-hosted journal article supplement (doi:10.1101/gr.269209.120), 2021-03-15
Supplement: Supplemental_Table_S6.xlsx [file Supplemental_Table_S6.xlsx]

## Sheet: Sheet1
Table S6: Dex-responsive regulatory elements in A549 cells in Johnson et al. data that were detected by CRADLE. Regulatory element type indicates activating and repressive regulatory elements for '1' and '-1', respectively.
chromosome	start	end	regulatory element type	p value	effect size
chr1	942544	942630	1	0.001288	22
chr1	943060	943232	1	0.000465859	106
chr1	1286458	1286630	-1	0.000415023	-82
chr1	1332038	1332726	1	1.16e-05	528
chr1	1741312	1741484	1	0.000471145	73
chr1	2255334	2255850	1	8e-05	317
chr1	2387344	2387516	1	1.43e-06	132
chr1	2961634	2961720	1	0.000548438	88
chr1	3109812	3110414	1	3.77e-05	140
chr1	3411586	3411672	-1	0.000661239	-92
chr1	3493802	3493974	1	0.00134927	98
chr1	3576706	3576792	1	0.000176661	55
chr1	3666404	3666834	1	2.23e-07	161
chr1	3841414	3841758	1	1.89e-05	123
chr1	4180168	4180254	1	0.000502934	70
chr1	4310372	4310716	1	0.000327883	81
chr1	4423118	4423290	1	0.000551332	86
chr1	4649298	4649470	1	0.000105078	106
chr1	4801604	4801690	1	0.0005033	62
chr1	4856988	4857246	1	3.03e-05	149
chr1	4912630	4912974	1	0.00163109	42
chr1	5142336	5142422	1	0.000173537	83
chr1	5196860	5197204	1	7.23e-08	222
chr1	5357336	5357766	1	1.86e-06	151
chr1	5652058	5652832	1	1.82e-07	369
chr1	5891826	5891998	1	8.31e-05	165
chr1	5965786	5965872	1	0.000359265	199
chr1	6156018	6156190	-1	0.000646238	-70
chr1	6157824	6158168	1	5.12e-05	308
chr1	6259390	6260078	1	1.38e-07	220
chr1	6295080	6295252	1	0.000942622	50
chr1	6319676	6319762	1	0.000701614	52
chr1	6334296	6334382	1	0.000542324	92
chr1	6385896	6385982	1	0.000637487	171
chr1	6437668	6437754	1	0.000129835	41
chr1	6701774	6701860	1	0.000822624	74
chr1	7070542	7070714	1	0.00124315	68
chr1	7109586	7109844	1	9.61e-05	120
chr1	7168496	7168926	1	0.000836603	195
chr1	7267654	7267998	1	0.000386518	326
chr1	7648806	7649408	1	9.45e-06	258
chr1	8004674	8005104	1	6.64e-05	292
chr1	8070894	8071152	1	5.62e-05	57
chr1	8258890	8259750	1	5.37e-08	339
chr1	8342998	8343084	1	0.000190065	26
chr1	8343256	8343944	1	5.95e-06	327
chr1	8348588	8348846	1	0.000151038	393
chr1	8396920	8397350	1	1.41e-05	248
chr1	8467354	8467440	1	0.000659547	59
chr1	8947320	8947578	1	3.21e-06	190
chr1	9002016	9002618	1	1.9e-07	178
chr1	9037964	9038910	1	2.22e-08	1803
chr1	9078642	9078986	1	1.65e-05	117
chr1	9180896	9181068	1	0.000850803	93
chr1	9377148	9377320	1	0.00038875	105
chr1	9436058	9436863	1	1.2e-07	354
chr1	9444486	9444916	1	6.92e-05	64
chr1	9700164	9700680	1	0.000146664	119
chr1	9733102	9733188	-1	0.000705187	-41
chr1	9878700	9878786	1	0.000444563	69
chr1	10745752	10746354	1	2.46e-05	231
chr1	10818594	10819024	1	3.5e-05	462
chr1	10862282	10862368	1	0.000281395	26
chr1	11121056	11121142	1	0.000756338	23
chr1	11159240	11159498	1	1.22e-05	158
chr1	11522160	11522418	-1	0.00015534	-54
chr1	11569460	11570148	1	1.19e-08	1373
chr1	11829352	11830040	1	2.64e-07	1275
chr1	11874072	11874674	1	2.12e-05	371
chr1	12078150	12078322	-1	0.000313162	-75
chr1	12860234	12860492	1	0.000126674	291
chr1	13619714	13620316	1	1.32e-06	336
chr1	13948664	13949180	1	9e-06	380
chr1	14138294	14138466	1	1.66e-05	60
chr1	14259038	14259468	1	0.000142728	159
chr1	15266098	15266528	1	0.000199137	106
chr1	15337048	15337220	1	0.000138984	95
chr1	15356312	15356570	1	1.66e-05	91
chr1	15432852	15433110	-1	0.000320101	-105
chr1	15800072	15800158	-1	0.000623057	-63
chr1	16016104	16016448	1	7.9e-06	242
chr1	16067274	16067532	1	0.000285356	147
chr1	16195586	16195758	1	0.000804182	130
chr1	16765380	16765810	1	0.000270577	68
chr1	16929401	16929745	1	0.000820106	194
chr1	16969133	16969305	-1	0.000164251	-61
chr1	16975067	16975411	1	2.18e-05	140
chr1	17193507	17193765	-1	7.69e-05	-108
chr1	17257835	17257921	1	0.000266992	54
chr1	17280109	17280195	-1	0.000310769	-86
chr1	17616713	17617057	1	9.93e-06	287
chr1	17630645	17631333	1	1.06e-05	446
chr1	18021515	18021773	1	0.000192936	138
chr1	18336791	18337049	-1	0.000245941	-195
chr1	18686467	18686639	-1	0.00144562	-49
chr1	19390807	19390893	-1	0.000723937	-47
chr1	19682691	19682777	-1	0.000791977	-83
chr1	19815733	19815905	-1	0.000791715	-55
chr1	20211419	20211935	1	0.000136279	156
chr1	20263019	20263277	-1	0.000136054	-59
chr1	20297247	20297333	1	0.000299541	83
chr1	20347815	20348159	1	2.96e-05	131
chr1	20607191	20607449	1	1.29e-05	58
chr1	20689837	20689923	-1	0.00068422	-74
chr1	20698695	20698781	1	0.000592236	69
chr1	20725441	20725613	1	3.44e-05	107
chr1	21659659	21659745	1	0.000174222	78
chr1	21841119	21841377	-1	0.000974251	-101
chr1	21890225	21890397	1	0.000579982	124
chr1	22232419	22232591	1	0.000778266	400
chr1	22348519	22348605	1	0.000805882	116
chr1	22711525	22711697	1	0.000419576	53
chr1	22818423	22818939	1	0.00107835	102
chr1	22839063	22839579	1	1.3e-07	138
chr1	22853597	22853683	1	0.000151158	237
chr1	22984145	22984231	1	0.000549198	67
chr1	23415607	23415693	-1	0.000606616	-43
chr1	23477269	23477871	1	4.73e-07	452
chr1	23984411	23984841	1	0.00012451	78
chr1	24121495	24121925	1	0.000700856	305
chr1	24294183	24294527	1	0.00025519	81
chr1	24315253	24315683	1	0.000540572	81
chr1	24558461	24558891	1	2.92e-05	209
chr1	24793843	24794101	1	7.55e-06	206
chr1	24907707	24908481	1	1.95e-08	145
chr1	24972723	24972809	-1	0.000273648	-58
chr1	25111785	25111871	1	0.000809044	49
chr1	25584871	25585129	1	0.000426735	166
chr1	26036285	26036973	1	1.1e-07	629
chr1	26067503	26067847	1	0.00133166	80
chr1	26156341	26156427	-1	2.45e-05	-68
chr1	26164167	26164253	1	0.000751149	80
chr1	26336855	26336941	1	0.000338718	73
chr1	26363429	26363515	-1	0.000755684	-72
chr1	26960871	26961043	1	0.000698511	60
chr1	26961817	26962161	1	4.17e-05	127
chr1	26999399	26999915	1	1.09e-05	419
chr1	27336089	27336261	1	0.00023155	61
chr1	27522193	27522537	1	0.000164244	172
chr1	27630983	27631585	1	8.86e-05	443
chr1	28862589	28863019	1	0.000133386	216
chr1	29286311	29286569	1	8.18e-05	86
chr1	29684727	29684813	-1	0.000689973	-58
chr1	29730909	29731167	1	0.000350115	239
chr1	29758171	29758343	1	0.000725857	97
chr1	29826541	29826713	-1	0.000785217	-72
chr1	30109739	30110341	1	4.93e-05	194
chr1	30788365	30789225	1	2.06e-09	1023
chr1	30864045	30864475	1	5.53e-06	151
chr1	31258441	31258699	1	0.000334828	100
chr1	32360875	32361477	1	6.78e-06	140
chr1	32501743	32502431	1	2.41e-05	253
chr1	33366817	33366903	-1	0.000841503	-54
chr1	33758805	33759063	1	2.5e-05	69
chr1	33940093	33940523	1	0.00010607	264
chr1	34916021	34916107	-1	0.000306274	-52
chr1	36200087	36200431	1	0.000314546	85
chr1	36359359	36359703	1	0.000153093	209
chr1	36673345	36673947	1	1.21e-05	490
chr1	36675323	36675667	1	0.00124036	59
chr1	36800281	36800539	1	0.000178783	119
chr1	36867705	36867791	-1	0.000172536	-85
chr1	37471683	37471855	-1	0.000130809	-96
chr1	37995853	37996025	1	9.09e-06	93
chr1	38009269	38009527	1	0.000316902	166
chr1	38549779	38549865	-1	0.000260741	-81
chr1	38608259	38608345	1	0.000174008	52
chr1	38663729	38663901	1	3.99e-05	127
chr1	38817669	38817841	-1	4.5e-05	-63
chr1	40952275	40952447	1	0.000350715	102
chr1	40987449	40987793	1	0.000299915	217
chr1	41003789	41003961	1	0.000259474	89
chr1	41465695	41466211	1	0.00034351	218
chr1	41496311	41496741	1	1.54e-05	455
chr1	42657827	42657913	1	0.00014038	23
chr1	43207281	43207539	1	8.59e-05	144
chr1	43241423	43241853	1	0.000104917	263
chr1	43543971	43544057	1	0.00076198	80
chr1	43544315	43544401	1	0.00023666	56
chr1	43600387	43600731	1	0.000220144	206
chr1	43615953	43616297	1	0.000411639	80
chr1	43635991	43636507	1	0.00170705	121
chr1	43692235	43692407	1	1.24e-05	176
chr1	43692579	43692665	1	0.000519529	98
chr1	44007339	44007597	1	3.73e-05	249
chr1	44239969	44240399	1	5.58e-05	315
chr1	44557825	44558255	1	7.52e-05	172
chr1	45179949	45180379	1	3.07e-06	229
chr1	46264409	46264581	1	6.66e-05	177
chr1	46556895	46557239	1	3.52e-05	138
chr1	46806553	46807155	1	0.000930284	305
chr1	47175149	47175407	1	5.15e-06	131
chr1	47894625	47895055	1	1.94e-06	171
chr1	47905977	47906149	1	0.000815533	102
chr1	48046931	48047619	1	6.4e-06	307
chr1	48050027	48050199	1	3.63e-05	222
chr1	50156683	50156941	1	0.000389494	87
chr1	50191255	50191341	1	0.000354549	101
chr1	50209659	50210175	1	1.85e-07	367
chr1	50371339	50371597	1	0.00014906	48
chr1	51896291	51896549	1	6.34e-05	113
chr1	52637181	52637353	1	0.000175914	58
chr1	52665475	52666077	1	0.000279554	203
chr1	53513435	53513521	-1	0.000143624	-67
chr1	53582579	53582665	-1	0.000199256	-59
chr1	53679673	53679845	-1	0.00132052	-109
chr1	53942575	53943091	1	0.000822046	207
chr1	54118789	54119133	1	2.99e-05	209
chr1	54124637	54124809	1	0.000314905	150
chr1	54370683	54371027	1	1.28e-05	96
chr1	54607011	54607269	1	5.97e-05	298
chr1	54623781	54623953	1	0.00113077	183
chr1	54987475	54987905	1	2.54e-05	198
chr1	54988421	54988507	-1	0.000207032	-71
chr1	55580875	55581391	1	0.000121696	109
chr1	55582423	55582595	1	0.000688086	109
chr1	55632131	55632303	1	0.000413744	55
chr1	56446723	56447067	1	3.24e-05	160
chr1	56477081	56477597	1	4.57e-06	358
chr1	56536163	56536249	1	0.000505567	56
chr1	57158115	57158545	1	5.18e-05	125
chr1	58607645	58607731	1	9.91e-05	50
chr1	58903571	58903829	1	0.00102157	69
chr1	58988625	58989227	1	1.02e-08	206
chr1	59159421	59160109	1	3.52e-05	129
chr1	59750843	59751187	1	0.000351239	69
chr1	60428179	60428523	1	0.000150129	132
chr1	60573175	60573519	1	0.000690357	111
chr1	61436701	61437303	1	1.49e-07	242
chr1	62753447	62753533	-1	0.000146326	-79
chr1	64370333	64370419	1	0.00024061	74
chr1	64954789	64955563	1	7.79e-05	380
chr1	65153449	65154051	1	1.74e-05	221
chr1	65297671	65298101	1	3.51e-05	91
chr1	65948949	65949207	1	4.2e-06	209
chr1	66190523	66191039	1	2.73e-06	351
chr1	66636519	66636949	1	0.000120124	103
chr1	67439587	67439845	1	0.000440751	83
chr1	67572715	67572887	1	0.000143599	163
chr1	67668433	67669121	1	6.35e-07	178
chr1	67749961	67750047	1	9.58e-05	181
chr1	68868047	68868305	1	0.000516894	50
chr1	71090029	71090201	1	0.000578216	77
chr1	75780297	75780727	1	0.000103026	101
chr1	79872349	79872435	-1	1.95e-06	-42
chr1	80926451	80926795	1	0.000107954	102
chr1	84365849	84366451	1	0.000234393	125
chr1	84688607	84688865	1	0.000366707	100
chr1	85220689	85220947	1	0.000221563	76
chr1	86513527	86513871	1	1.31e-06	137
chr1	86788555	86788727	1	0.00152183	73
chr1	87802323	87802753	1	1.63e-05	139
chr1	87986965	87987137	1	0.000688334	55
chr1	88037447	88037533	-1	0.000755951	-53
chr1	88154063	88154407	1	1.23e-05	99
chr1	88313507	88313851	1	1.03e-05	69
chr1	89160091	89160263	1	0.00102879	58
chr1	90274393	90274823	1	9.67e-05	180
chr1	91016143	91016487	1	0.0010504	133
chr1	91608941	91609457	1	4.67e-05	282
chr1	92391025	92391541	1	6.4e-06	172
chr1	92436605	92436691	1	0.000753694	70
chr1	92804857	92805115	1	0.000121777	128
chr1	95115849	95116193	1	7.88e-06	55
chr1	95207611	95207697	1	0.000111885	116
chr1	95332655	95333343	1	3.61e-06	261
chr1	95370151	95370925	1	3.73e-07	301
chr1	99580453	99580797	1	0.000383072	198
chr1	100028771	100028943	-1	0.000266632	-46
chr1	100835709	100835795	-1	0.000813781	-129
chr1	100947165	100947595	1	0.000801404	89
chr1	103300211	103300555	1	0.000403888	212
chr1	103377267	103377783	1	0.000668146	458
chr1	107502773	107503031	1	5.53e-05	121
chr1	107533389	107533475	1	0.000665339	88
chr1	109298797	109299055	1	0.000209081	120
chr1	109928145	109928317	1	4.76e-05	167
chr1	110158195	110158281	1	0.00076904	88
chr1	110555085	110555171	-1	0.000837779	-73
chr1	110778169	110778427	1	0.000590598	61
chr1	111257103	111257275	-1	0.0012944	-47
chr1	111396595	111396767	1	3.55e-05	95
chr1	111489733	111490077	1	0.000416293	170
chr1	111884989	111885419	1	4.95e-06	173
chr1	112141957	112142215	1	2.4e-06	138
chr1	112866163	112866507	1	0.000323921	103
chr1	114787489	114787747	1	0.000438573	60
chr1	115617819	115618249	1	2.02e-05	164
chr1	116376339	116376769	1	0.000109291	186
chr1	116476357	116476615	1	0.000470678	101
chr1	116484011	116484183	1	0.00027602	140
chr1	117070101	117070531	1	9.02e-07	85
chr1	117163153	117163239	1	0.000203212	55
chr1	119052745	119052831	1	0.000791623	99
chr1	119542515	119542945	1	3.74e-05	192
chr1	119958325	119958927	1	1.26e-05	96
chr1	143756229	143756315	1	0.000691774	54
chr1	145892039	145892469	1	3.7e-05	310
chr1	145949229	145949573	1	0.000295146	190
chr1	147109713	147110315	1	4.67e-06	212
chr1	147231145	147231489	1	0.000107526	219
chr1	147769849	147770451	1	2.35e-05	184
chr1	148424137	148424481	1	0.000728661	113
chr1	149914431	149914517	1	0.00054635	55
chr1	150281651	150282081	1	0.000329349	287
chr1	150561237	150561839	1	2.27e-05	364
chr1	150568117	150568547	1	2.6e-07	160
chr1	151377721	151377893	-1	9.29e-05	-48
chr1	151391481	151391567	1	0.000583789	38
chr1	151540863	151540949	1	0.0002272	63
chr1	152168491	152169007	1	0.00047691	167
chr1	152539667	152540183	1	0.000512866	117
chr1	152761805	152762063	1	0.000725295	140
chr1	152909295	152909553	1	0.000184117	147
chr1	153956087	153956173	1	0.000799336	51
chr1	154418079	154418853	1	0.000418619	497
chr1	154575459	154575545	1	0.000596005	49
chr1	154575889	154575975	1	0.000702977	71
chr1	154877233	154877921	1	1.34e-05	205
chr1	155017069	155017671	1	4.11e-06	411
chr1	155077871	155078215	1	0.000332752	125
chr1	155131277	155131707	1	1.19e-05	253
chr1	155677979	155678409	1	1.29e-05	72
chr1	156616153	156616927	1	4.22e-09	274
chr1	156619679	156620195	-1	0.000497191	-40
chr1	156632407	156632493	1	6.15e-05	53
chr1	157283771	157285061	1	1.74e-09	3667
chr1	157419479	157420769	1	3.44e-08	5979
chr1	157803899	157803985	-1	0.00057249	-55
chr1	158430065	158430323	1	0.000715392	86
chr1	158989409	158989667	1	0.00129267	100
chr1	159598203	159598289	1	0.000274226	87
chr1	159598461	159598547	1	0.000346071	197
chr1	159835305	159835563	1	0.000452695	159
chr1	160131833	160132349	1	1.28e-07	169
chr1	160132521	160132607	1	0.000856715	38
chr1	160349929	160350015	1	0.000749207	104
chr1	160823703	160823789	1	0.000513773	112
chr1	160952359	160952617	1	0.000198234	214
chr1	161170283	161170713	1	5.99e-06	117
chr1	161242695	161242781	1	1.41e-05	85
chr1	162388387	162389075	1	4.87e-05	572
chr1	164197139	164197569	1	3.01e-05	89
chr1	164972601	164972687	1	0.000490497	24
chr1	165106331	165106589	1	0.000183159	78
chr1	165376027	165376113	1	0.000400281	61
chr1	165429261	165429863	1	7.28e-07	356
chr1	166282467	166282639	1	0.000120275	90
chr1	167136189	167136619	1	1.01e-07	208
chr1	167617445	167617703	1	0.000260885	103
chr1	167697855	167697941	1	3.94e-05	75
chr1	169485709	169486483	1	2.8e-08	259
chr1	172456579	172456665	1	0.000281348	84
chr1	172544471	172544987	1	4.73e-05	111
chr1	172746141	172746743	1	2.66e-09	314
chr1	173527193	173527451	1	0.000901952	126
chr1	175656983	175657155	1	0.00105626	107
chr1	176358829	176358915	1	0.000520361	53
chr1	176761223	176761567	1	3.51e-05	96
chr1	177211347	177211691	1	0.00032505	57
chr1	177449051	177449395	1	0.00111028	94
chr1	177471325	177471755	1	0.000457848	94
chr1	178513731	178513817	-1	0.00077079	-62
chr1	178537381	178537467	1	0.000833946	113
chr1	178537639	178538069	1	7.47e-05	171
chr1	178583821	178584079	-1	0.000134959	-61
chr1	178587347	178587519	1	0.000927042	58
chr1	178946569	178946655	1	0.000618217	52
chr1	180528969	180529313	1	6.04e-05	99
chr1	181247585	181247671	1	2.18e-05	83
chr1	182174063	182174407	1	0.000106026	97
chr1	182290249	182290593	1	2.29e-06	66
chr1	182742695	182742867	1	5.45e-05	46
chr1	182982119	182982635	1	1.86e-05	61
chr1	183353639	183353811	1	0.000972951	191
chr1	183375655	183376085	1	8.45e-05	94
chr1	183916165	183916509	1	2.13e-05	207
chr1	183943685	183943857	-1	0.000213749	-55
chr1	184368095	184368267	1	0.000251885	90
chr1	184801449	184801535	1	1.01e-05	44
chr1	186793037	186793295	1	0.000985605	94
chr1	188846631	188846717	1	0.000776487	49
chr1	189513303	189513561	1	0.000315377	85
chr1	191596567	191596653	1	0.000821851	86
chr1	192907465	192907895	1	3.27e-05	121
chr1	193156693	193156951	1	0.000425973	103
chr1	193506885	193506971	1	0.000577419	74
chr1	195894245	195894847	1	6.33e-05	444
chr1	201358427	201358943	1	9.16e-05	270
chr1	201449071	201449157	1	0.000397349	201
chr1	202438587	202439017	1	0.000180619	166
chr1	203490539	203490797	1	0.000102345	49
chr1	203558307	203558651	1	5.92e-05	155
chr1	204150073	204150675	1	4.27e-05	224
chr1	204379091	204379263	1	0.00129625	73
chr1	204562271	204562443	-1	0.000229485	-67
chr1	204662375	204662461	1	2.83e-05	99
chr1	204903433	204903863	1	0.0007546	57
chr1	204976791	204977049	1	0.000248345	162
chr1	205453059	205453403	1	0.000989501	58
chr1	205939647	205940163	1	1.04e-05	259
chr1	205975939	205976541	1	1.37e-05	195
chr1	206573983	206574413	1	5.24e-05	135
chr1	206730589	206730847	1	0.000442617	74
chr1	206748563	206749079	1	0.000231742	103
chr1	208178313	208178399	1	0.000647017	92
chr1	208207467	208207725	1	0.000646799	112
chr1	209530749	209531351	1	1.93e-05	886
chr1	209538145	209538403	-1	0.000161319	-45
chr1	209873373	209873975	1	7.9e-07	322
chr1	211198117	211198547	1	9.18e-05	308
chr1	211874679	211875195	1	4.99e-06	303
chr1	212525527	212525699	1	0.00081475	90
chr1	212915537	212915795	1	0.000129404	173
chr1	213201487	213201745	1	0.000370257	111
chr1	213894217	213894475	1	0.0009623	65
chr1	215164781	215164867	1	0.000729209	68
chr1	216633317	216633489	-1	0.000748242	-70
chr1	216765671	216765843	1	0.000121822	124
chr1	220457995	220458081	-1	0.000619935	-65
chr1	220957311	220957483	-1	4.44e-05	-56
chr1	221563353	221563869	1	0.000172936	370
chr1	221736987	221737245	1	0.00131677	67
chr1	221845863	221846465	1	8.35e-06	437
chr1	221869083	221869341	1	0.000302597	77
chr1	221891615	221892131	1	5.84e-06	173
chr1	223109633	223110235	1	7.89e-06	470
chr1	223159685	223160115	1	0.000179477	87
chr1	223248179	223248351	1	3.89e-06	82
chr1	224014167	224014511	1	0.000334503	101
chr1	225736317	225736919	1	2.4e-05	207
chr1	225944437	225944609	-1	7.22e-05	-67
chr1	225977633	225977805	1	0.000656707	107
chr1	226348895	226349067	1	0.000115178	60
chr1	226708547	226708805	1	0.000776053	122
chr1	226833935	226834107	1	0.000479066	44
chr1	226834279	226834365	1	0.00260589	39
chr1	227606215	227606645	1	3.5e-05	81
chr1	227775119	227775205	1	0.00073998	47
chr1	227933789	227934219	1	0.000133924	238
chr1	228197465	228198153	1	3.99e-05	284
chr1	228225071	228225587	1	5.01e-05	104
chr1	228269017	228269533	1	3.8e-05	223
chr1	229120924	229121010	1	0.000724412	53
chr1	229621100	229621272	1	0.000199791	46
chr1	229843840	229844184	1	6.21e-05	213
chr1	230104850	230105194	-1	0.000116097	-134
chr1	230191022	230191280	1	4.3e-05	61
chr1	230263950	230264122	1	0.000113921	100
chr1	230324150	230324494	-1	0.000281033	-76
chr1	230629622	230629966	1	5.78e-05	78
chr1	231278148	231278664	1	0.000259677	153
chr1	231449030	231449288	1	9.82e-05	69
chr1	231800168	231800684	1	2.02e-05	152
chr1	231818658	231818744	1	5.28e-05	51
chr1	231926416	231926760	1	0.00018955	231
chr1	232648386	232648644	1	1.71e-05	116
chr1	233355908	233356424	1	2.77e-05	165
chr1	234072804	234073320	1	1.76e-05	406
chr1	234666462	234666720	1	0.000968429	174
chr1	234719438	234720040	1	5.91e-08	254
chr1	234748334	234748420	1	0.000821267	55
chr1	234866584	234866670	1	0.000320992	105
chr1	234875786	234875958	1	0.000669073	283
chr1	234997132	234997820	1	1.82e-05	502
chr1	235087862	235087948	-1	0.000281788	-41
chr1	235659590	235660020	1	0.000163605	152
chr1	237891806	237892408	1	7.9e-06	221
chr1	237932914	237933086	-1	7.81e-05	-165
chr1	240675970	240676056	1	0.000142546	75
chr1	240762744	240762916	-1	0.000744294	-69
chr1	242530646	242531334	1	0.000318068	212
chr1	242546900	242547244	1	1.59e-05	93
chr1	242610196	242610712	1	8.94e-07	148
chr1	244239466	244239724	-1	0.000123524	-300
chr1	244536252	244536682	1	0.000153716	128
chr1	246052260	246052518	1	2.53e-05	98
chr1	246609110	246609196	-1	0.000282437	-114
chr1	246947176	246947692	1	8.43e-08	144
chr10	264388	265334	1	2.07e-05	286
chr10	386078	386250	1	0.000441428	108
chr10	1101770	1102544	1	6.29e-08	405
chr10	1182868	1182954	1	0.000537905	54
chr10	1274200	1274888	1	9.26e-06	234
chr10	1324854	1325112	1	7.17e-05	85
chr10	2256406	2256664	1	6.88e-05	130
chr10	3150634	3150978	1	8.39e-05	162
chr10	3292620	3292964	1	5.56e-07	104
chr10	3320914	3321086	1	0.000712326	155
chr10	3404764	3404936	1	0.000261672	134
chr10	3809996	3810598	1	3.1e-06	205
chr10	4677994	4678510	1	3.6e-06	132
chr10	5513484	5513656	1	0.000870275	117
chr10	5576608	5576952	-1	0.000545057	-55
chr10	5897560	5897904	1	4.42e-06	76
chr10	6183080	6183166	1	7.95e-05	74
chr10	6255406	6255922	1	0.000221172	189
chr10	6287398	6287656	1	4.11e-05	73
chr10	6514266	6514524	1	1.06e-05	105
chr10	7196332	7196762	1	1.37e-07	162
chr10	7310024	7310368	1	0.000313004	106
chr10	7381404	7381576	1	0.00125096	54
chr10	7459664	7459836	1	0.000559712	94
chr10	8639584	8639928	1	0.000151728	111
chr10	9987204	9987548	1	0.000274408	113
chr10	10624120	10624292	1	0.000178641	108
chr10	11339812	11339898	1	0.000803868	45
chr10	11825884	11826228	1	9.78e-06	50
chr10	11898124	11898640	1	1.82e-05	264
chr10	11913174	11913260	-1	0.000799374	-87
chr10	11989456	11989886	1	0.000638857	105
chr10	12246768	12247800	1	1.02e-05	326
chr10	12812046	12812218	1	0.000245793	68
chr10	12834750	12835008	1	9.25e-05	49
chr10	12858400	12858658	1	0.000105576	63
chr10	13135492	13135578	1	0.000719604	35
chr10	13144178	13144264	1	0.000389093	43
chr10	13646504	13646590	-1	0.000659236	-56
chr10	13885756	13885928	-1	0.000598206	-69
chr10	14276454	14276540	1	0.0007475	78
chr10	14712990	14713506	1	2.5e-06	183
chr10	14993350	14993866	1	8.66e-05	123
chr10	15086488	15086574	1	0.000739894	92
chr10	15222196	15222712	1	4.19e-06	164
chr10	15710504	15710848	1	2.08e-05	221
chr10	15878204	15878548	1	0.000518586	164
chr10	16280942	16281028	1	0.000228737	55
chr10	17233564	17233994	1	5.85e-06	141
chr10	18020894	18020980	-1	8.62e-05	-46
chr10	18067076	18067334	1	2.05e-05	150
chr10	19231774	19231860	1	0.000825596	57
chr10	19561842	19562100	1	0.000735934	94
chr10	20531492	20531578	1	0.000519438	97
chr10	21184146	21184576	1	2.74e-05	219
chr10	24263290	24263376	1	0.000220165	50
chr10	24306462	24307150	1	1.24e-06	234
chr10	25062230	25062832	1	4.32e-05	299
chr10	25696480	25696652	1	0.00055614	67
chr10	28399890	28400664	1	2.68e-08	317
chr10	28871514	28871600	1	0.000267225	60
chr10	29153680	29153852	1	0.00105871	81
chr10	29241314	29241658	1	0.000177749	135
chr10	29946772	29947288	1	2.5e-05	330
chr10	30776242	30776500	1	2.98e-07	93
chr10	31141226	31141312	1	0.000141083	26
chr10	31232988	31233418	1	0.00021058	532
chr10	32953246	32953504	1	9.33e-05	173
chr10	35495578	35495836	1	0.000352024	91
chr10	36019146	36019490	1	9.87e-05	161
chr10	36066618	36066790	-1	0.000182393	-80
chr10	36408296	36408812	1	5.92e-05	265
chr10	37976850	37976936	1	0.000362042	64
chr10	43305964	43306136	-1	3.02e-05	-96
chr10	43965928	43966100	1	0.000231651	86
chr10	44196150	44196322	1	0.000253803	155
chr10	44312336	44312680	1	2.54e-05	110
chr10	44435230	44435316	-1	0.000110901	-258
chr10	44595104	44595276	1	0.0011178	47
chr10	44963958	44964646	1	2.87e-05	614
chr10	44975052	44975224	1	0.000876842	89
chr10	45160210	45160812	1	0.000103778	276
chr10	45474024	45474368	1	0.000155063	362
chr10	47183532	47184134	1	3.69e-06	302
chr10	47277702	47277874	-1	0.000113414	-52
chr10	47373420	47374022	1	7.01e-09	224
chr10	47402058	47402230	1	0.000673375	50
chr10	47701338	47701682	1	0.00047342	44
chr10	48535836	48536008	1	5.13e-05	58
chr10	48956892	48957322	1	5.92e-05	229
chr10	49153918	49154090	1	0.000364647	59
chr10	49362984	49363242	1	7.33e-05	193
chr10	49372014	49372272	-1	0.000689306	-118
chr10	49552098	49552528	1	0.000264574	83
chr10	49679464	49679550	1	0.000791931	77
chr10	49738460	49738718	1	0.000973095	178
chr10	50658574	50658746	-1	0.00107666	-55
chr10	50806064	50806408	1	0.000642817	95
chr10	51547900	51548244	1	0.000700238	79
chr10	52756286	52756630	1	0.00011247	111
chr10	52772540	52772626	-1	0.000383471	-65
chr10	52883996	52884082	1	0.000207732	98
chr10	53596162	53596420	1	8.5e-05	83
chr10	57778772	57779288	1	1.34e-05	190
chr10	58621744	58622260	1	0.000888735	190
chr10	60069124	60069554	1	0.00138157	78
chr10	60123304	60123734	1	0.00010847	111
chr10	61410294	61410982	1	2.33e-06	830
chr10	61984000	61984258	1	0.00140823	46
chr10	62763074	62763246	1	0.00021866	194
chr10	63760674	63761104	1	2.87e-06	250
chr10	66812986	66813244	1	0.000274578	77
chr10	68648140	68648398	1	0.000443835	73
chr10	68999794	68999966	1	0.000225599	39
chr10	69932722	69932808	-1	0.000748708	-62
chr10	70254104	70254792	1	5.01e-07	560
chr10	70651338	70651424	1	0.000747373	72
chr10	71060182	71060268	1	4.08e-05	66
chr10	71061558	71061816	1	0.000714687	56
chr10	71349400	71349916	1	1.45e-05	328
chr10	71388874	71389046	-1	3.27e-06	-57
chr10	71756868	71757040	1	9.34e-05	59
chr10	71766672	71767188	1	5.21e-07	315
chr10	71990788	71991218	1	2.35e-07	168
chr10	72030692	72030950	1	0.000272049	57
chr10	72119616	72119702	1	0.000196907	222
chr10	72243628	72243972	1	3.3e-05	171
chr10	72248702	72249218	1	5.36e-05	218
chr10	72255066	72255496	1	6.54e-05	195
chr10	72334788	72335390	1	1.1e-05	294
chr10	73647062	73647148	1	1.87e-05	37
chr10	73807624	73807710	1	0.000251417	68
chr10	74056336	74056938	1	6.02e-06	527
chr10	74371698	74371870	1	0.00105641	46
chr10	74486680	74486938	1	0.000265046	56
chr10	75156448	75156792	1	0.000516874	58
chr10	76269976	76270148	1	4.72e-05	129
chr10	77155604	77155862	1	0.00171923	55
chr10	77336892	77337494	1	5.18e-05	169
chr10	77377312	77377484	1	0.000390861	73
chr10	77614844	77615016	1	0.000115485	125
chr10	78578818	78579334	1	1.68e-05	303
chr10	78605306	78605392	1	7.11e-05	70
chr10	78823058	78823144	1	0.000458183	68
chr10	78851610	78851696	1	0.000830734	81
chr10	79223732	79223990	1	1.89e-05	138
chr10	79246178	79246522	1	0.000114864	195
chr10	79321170	79321256	-1	0.000821249	-99
chr10	79329426	79330200	1	3.57e-06	394
chr10	79331748	79332178	-1	0.000197736	-325
chr10	79347400	79347486	1	0.000240188	51
chr10	79983112	79983456	-1	5.06e-05	-64
chr10	80158896	80159068	-1	0.000628684	-97
chr10	80266052	80266310	1	3.44e-07	284
chr10	80541596	80541682	1	9.76e-05	92
chr10	80665952	80666124	1	0.000180996	168
chr10	82266412	82266842	1	0.00102867	94
chr10	82924828	82924914	1	0.000691738	45
chr10	83764876	83765220	1	0.00127313	63
chr10	84632874	84633304	1	0.000802358	159
chr10	84684388	84684904	1	0.000224091	134
chr10	85139156	85139500	1	0.0012384	127
chr10	85601492	85601836	1	0.000880197	52
chr10	86664882	86665398	1	2.97e-05	245
chr10	87162822	87163252	1	9.89e-05	117
chr10	88244014	88244702	1	0.000148529	277
chr10	88457638	88457982	1	1.55e-05	181
chr10	89207300	89207730	1	4.27e-06	252
chr10	89267070	89267328	-1	0.000249477	-47
chr10	89327786	89327958	-1	0.000134966	-116
chr10	90173682	90173940	1	0.000412183	53
chr10	90179616	90180046	1	1.84e-05	567
chr10	90784626	90785228	1	5.23e-06	377
chr10	90960410	90961012	1	4.77e-05	211
chr10	91163800	91164230	1	3.22e-06	179
chr10	91643078	91643422	1	6.5e-05	134
chr10	92124076	92124420	1	0.000560452	78
chr10	92731236	92731494	1	4.34e-05	98
chr10	93286796	93286882	-1	0.000449911	-60
chr10	93753604	93753862	1	0.000251505	72
chr10	94062602	94063032	1	0.000311627	224
chr10	94252662	94253092	1	0.000136017	53
chr10	94803578	94803750	-1	0.000363169	-56
chr10	96092804	96093406	1	2.68e-05	227
chr10	96333604	96333690	1	0.000819027	103
chr10	97150948	97151206	1	7.5e-05	80
chr10	97609156	97609414	1	0.000312449	108
chr10	97687244	97687416	1	0.000410405	198
chr10	97823726	97824242	1	3.3e-06	255
chr10	97903276	97903362	1	0.000474847	72
chr10	97922970	97923142	1	0.000155298	94
chr10	98027976	98028234	1	0.000209261	193
chr10	98400700	98401044	1	0.000225001	90
chr10	99454372	99454888	1	0.000757175	171
chr10	99874568	99874654	1	0.000569293	81
chr10	99994280	99994366	1	0.00086271	60
chr10	100488952	100489382	1	1.5e-05	283
chr10	100506668	100506840	-1	0.00012692	-51
chr10	100547948	100548120	1	0.000407301	82
chr10	100697072	100697416	1	1.83e-06	232
chr10	101961616	101962046	1	0.000132706	98
chr10	102534892	102534978	-1	0.000203441	-113
chr10	102669568	102669654	1	0.000198237	154
chr10	103080906	103081336	1	0.000120377	128
chr10	103548660	103548832	1	0.000249128	133
chr10	103652118	103652204	1	0.000189684	85
chr10	104086590	104086676	1	0.000784445	52
chr10	104516332	104516504	-1	0.000487281	-60
chr10	104809506	104810108	1	1.49e-07	572
chr10	106414438	106414524	1	0.000426803	104
chr10	106424070	106424328	1	0.000430125	85
chr10	106708902	106708988	1	0.000761614	101
chr10	107160832	107161348	1	3.21e-06	418
chr10	107668662	107668834	1	6.43e-06	75
chr10	108535456	108535800	1	0.000433516	57
chr10	108599096	108599268	1	0.000315946	62
chr10	109454796	109455140	1	1.82e-05	144
chr10	109740574	109740746	1	4.84e-06	103
chr10	110145376	110145548	-1	0.00125498	-55
chr10	110323568	110323740	1	0.000509596	63
chr10	110429262	110429692	1	1.56e-06	223
chr10	110512682	110513198	-1	0.000188988	-237
chr10	110784098	110784700	1	6.76e-07	345
chr10	110837332	110837762	1	0.00122468	145
chr10	111161380	111161724	1	2.48e-05	94
chr10	112227522	112227952	1	7.52e-06	212
chr10	112332356	112332786	1	0.000578941	306
chr10	112631464	112632066	1	7.01e-05	284
chr10	112804582	112804840	1	0.000326322	114
chr10	112906836	112907352	1	1.14e-06	433
chr10	113031020	113031106	1	4.14e-05	54
chr10	113168534	113168620	1	0.00047132	58
chr10	113423868	113423954	-1	0.000492899	-46
chr10	113548310	113548568	1	0.000118466	129
chr10	113726072	113726158	1	0.000255556	48
chr10	113844064	113844236	1	8.01e-05	138
chr10	114274924	114275268	1	0.00024419	103
chr10	114477196	114477712	1	0.000391362	249
chr10	114607314	114607744	1	0.00123119	229
chr10	116093308	116093738	1	0.000158754	146
chr10	116553150	116553838	1	0.000970292	215
chr10	116848646	116848732	1	0.000361404	114
chr10	117374364	117374450	1	0.000232997	78
chr10	117804622	117805224	1	8.46e-05	567
chr10	118571140	118571484	1	3.51e-05	216
chr10	118870420	118871022	1	0.000346757	120
chr10	118956764	118957022	1	0.000166466	198
chr10	119669790	119669962	-1	0.00131623	-45
chr10	119849444	119849788	1	9.1e-05	139
chr10	120517836	120518266	1	1.01e-05	93
chr10	121162234	121162320	1	0.000873819	43
chr10	122120876	122121650	1	2.18e-07	1521
chr10	122316268	122316612	1	4.91e-06	207
chr10	122811972	122812058	1	0.000376788	85
chr10	123382496	123382926	1	4.93e-05	135
chr10	123478386	123478558	-1	0.00190804	-50
chr10	123478730	123478816	-1	0.00120556	-40
chr10	123940206	123940636	1	1.96e-05	225
chr10	124370730	124370816	-1	0.000803884	-73
chr10	124525014	124525272	1	1.87e-05	98
chr10	124560360	124560876	1	5.06e-06	192
chr10	124991134	124991220	1	0.000415507	94
chr10	125201232	125201490	1	0.000348811	97
chr10	125545060	125545146	1	0.000516077	68
chr10	125657032	125657204	1	8.65e-06	124
chr10	125940488	125940746	1	0.000798491	108
chr10	126066564	126066736	1	0.000331461	74
chr10	127044470	127044556	1	0.000774001	95
chr10	127328958	127329474	1	0.000520764	265
chr10	127889678	127889850	1	3.76e-05	128
chr10	128609412	128609498	1	0.000681904	71
chr10	128978782	128978868	-1	0.000524472	-51
chr10	129118016	129118274	1	0.000309965	76
chr10	129550080	129550596	1	3.62e-05	386
chr10	129816422	129817196	1	2.64e-06	520
chr10	130200412	130200584	1	0.000171444	122
chr10	130301376	130301462	-1	3.3e-06	-58
chr10	130463658	130463830	-1	0.000232934	-62
chr10	130715810	130715896	1	0.000439663	129
chr10	130717702	130717788	1	0.000302522	81
chr10	131024034	131025324	1	1.04e-07	327
chr10	131068496	131068668	1	0.000748302	76
chr10	131109002	131109432	1	3.73e-06	256
chr10	131475792	131476480	1	2.95e-05	715
chr10	131570392	131570564	1	3.5e-06	200
chr10	131949644	131950074	1	3.69e-06	100
chr10	132209020	132209106	1	0.000142298	81
chr10	132342406	132342750	1	5.44e-05	113
chr10	132482156	132482758	1	0.000303793	264
chr10	132685374	132686062	1	2.02e-05	197
chr10	132765612	132766300	1	4.92e-07	427
chr11	432380	432466	-1	0.000274303	-66
chr11	689520	689950	1	0.00225016	295
chr11	856962	857220	1	0.000681655	84
chr11	1760392	1760564	-1	0.00120206	-239
chr11	1856884	1856970	-1	0.000638323	-67
chr11	2193230	2193660	1	0.000737408	151
chr11	2360070	2360156	1	0.000840891	62
chr11	2376066	2376238	1	0.000408168	91
chr11	2388192	2388364	-1	3.45e-05	-67
chr11	2392234	2392320	-1	5.43e-05	-113
chr11	2424914	2425086	-1	0.00122755	-84
chr11	2463098	2463528	1	5.7e-05	214
chr11	3124352	3124610	1	0.000282361	209
chr11	3199172	3199774	1	4.07e-05	289
chr11	3969904	3970248	1	0.000734907	64
chr11	3999746	4000004	1	0.000226887	98
chr11	5097536	5097622	1	0.000294105	128
chr11	5646216	5646732	1	7.56e-05	116
chr11	6359844	6359930	1	0.000405405	49
chr11	6412648	6412992	1	0.000444271	77
chr11	6607954	6608470	1	2.84e-05	1016
chr11	7098326	7098584	1	0.000479635	69
chr11	7600308	7600480	-1	0.000957821	-85
chr11	7708668	7709184	1	4.88e-06	91
chr11	7992726	7992984	1	0.000117475	75
chr11	8035296	8036070	1	2.56e-05	358
chr11	8266894	8267668	1	7.83e-06	572
chr11	8661978	8662236	1	2.85e-05	53
chr11	9030402	9030488	1	0.000846127	57
chr11	10305782	10305868	-1	0.0007634	-48
chr11	10568598	10568856	1	0.000864906	115
chr11	11622872	11622958	1	0.000650205	74
chr11	12070158	12071018	1	3.68e-07	1310
chr11	12109546	12109804	1	0.000706629	164
chr11	12140592	12140678	1	0.000174313	31
chr11	12381994	12382338	1	0.000250616	109
chr11	12528452	12528710	1	1.52e-05	110
chr11	12545050	12545566	1	1.66e-05	193
chr11	12853618	12854134	1	1.96e-05	252
chr11	13525708	13525794	1	0.00058135	64
chr11	15017550	15017722	-1	0.000846123	-56
chr11	15106560	15106990	1	1.07e-05	182
chr11	15665732	15665818	1	0.000302933	71
chr11	15668570	15668656	1	0.000345972	67
chr11	15842462	15842720	-1	2.78e-05	-44
chr11	17012664	17013352	1	8.16e-07	314
chr11	17405770	17406028	1	0.000155384	130
chr11	17411016	17411274	1	0.000377012	156
chr11	17467948	17468636	1	0.000361553	386
chr11	18265684	18266200	1	7.67e-06	129
chr11	18394254	18394340	1	0.000448786	106
chr11	18834144	18834230	1	1.19e-05	65
chr11	19628010	19628612	1	0.000101169	186
chr11	19913616	19913702	1	0.000677936	50
chr11	20035736	20035822	1	0.000144794	136
chr11	23822316	23822832	1	1.04e-05	127
chr11	27729124	27729210	1	0.000630642	84
chr11	27972504	27973020	1	7.01e-06	145
chr11	29773516	29774290	1	9.88e-05	369
chr11	30364250	30364336	-1	0.000632521	-56
chr11	30424794	30425396	1	0.000759756	86
chr11	30487230	30487402	-1	0.000802816	-58
chr11	30913618	30913704	1	0.000382162	65
chr11	32070060	32070318	1	6.26e-05	106
chr11	32113146	32113748	1	2.5e-06	261
chr11	32532052	32532138	1	0.000226341	64
chr11	33701394	33701566	1	0.00187336	93
chr11	33701738	33702082	1	0.000152611	90
chr11	33932476	33932562	1	0.000212248	142
chr11	34163644	34163816	1	0.000719522	66
chr11	34220060	34220404	1	0.00015186	123
chr11	34234164	34234594	-1	0.000679895	-89
chr11	34316810	34316982	1	0.000712779	157
chr11	34318530	34318874	1	5.61e-06	224
chr11	35168640	35169070	1	1.26e-05	99
chr11	35907896	35908584	1	1.53e-05	324
chr11	35950208	35950380	1	0.00149396	76
chr11	36193158	36193416	1	0.000609972	67
chr11	41309040	41309126	1	0.000580196	65
chr11	42085620	42085706	1	0.000872592	21
chr11	42161988	42162246	1	0.0016612	75
chr11	44209046	44209476	1	1.33e-06	97
chr11	44659600	44659858	1	0.000189697	270
chr11	44689700	44690044	1	0.000145584	202
chr11	44950796	44950882	1	0.000321725	56
chr11	45022004	45022176	1	0.000258753	72
chr11	45097598	45097942	1	0.00115506	137
chr11	45209742	45210172	1	2.93e-05	177
chr11	45557354	45557784	1	0.000107247	151
chr11	45558644	45558730	-1	0.000206723	-56
chr11	45765904	45766076	1	0.000734153	123
chr11	45766678	45766936	1	0.000613247	129
chr11	45876242	45877016	1	2.66e-07	168
chr11	45891722	45891980	1	0.00195021	97
chr11	46558050	46558136	-1	0.000101737	-53
chr11	47305648	47305906	1	8.18e-05	150
chr11	47407128	47407300	1	0.000303713	95
chr11	58915460	58915546	-1	0.000176924	-51
chr11	59880208	59880638	1	6.34e-06	58
chr11	61330082	61330340	1	3.09e-06	93
chr11	61406106	61406278	1	0.000587357	52
chr11	61447902	61448160	1	0.000869778	77
chr11	61481098	61481270	-1	0.00029317	-104
chr11	61533214	61533816	1	0.000203741	193
chr11	61851242	61851758	1	0.000155727	333
chr11	61949626	61949712	-1	0.000255994	-88
chr11	62141492	62141578	-1	0.00038655	-109
chr11	62232652	62233082	1	5.27e-05	151
chr11	62508282	62508798	1	2.6e-05	198
chr11	63202388	63202646	-1	0.000360295	-93
chr11	63246076	63246162	1	0.000564446	34
chr11	64230518	64230690	1	0.000810752	61
chr11	64429350	64429866	1	7.53e-05	167
chr11	64505030	64505374	1	0.000395664	118
chr11	64734908	64735596	1	3.88e-06	330
chr11	65357978	65358236	1	0.000117737	94
chr11	65472100	65472444	1	0.00109655	245
chr11	65491966	65492482	1	0.000264151	225
chr11	65775336	65775938	1	7.28e-07	382
chr11	66186158	66186244	1	9.84e-05	28
chr11	66186588	66186846	1	3.83e-05	120
chr11	66228556	66228900	1	0.000105838	116
chr11	66366070	66366156	-1	2.93e-05	-68
chr11	66373208	66373466	1	0.000617683	96
chr11	66526374	66526460	1	0.000754323	52
chr11	67429374	67429546	1	2.56e-05	60
chr11	68342780	68342866	1	6.53e-05	81
chr11	68651692	68652208	1	1.74e-05	454
chr11	68932052	68932138	1	1.85e-05	45
chr11	69114114	69114458	-1	0.00090623	-78
chr11	69120134	69120392	-1	0.000645048	-74
chr11	69122886	69123316	1	5.04e-05	491
chr11	69252402	69252488	-1	0.000615357	-64
chr11	69371598	69371684	-1	5.69e-05	-68
chr11	69970674	69971276	1	0.000119318	500
chr11	70106296	70106468	1	0.000912044	150
chr11	70134504	70135020	1	0.000619547	340
chr11	70135192	70135364	-1	0.000632954	-63
chr11	70165120	70165292	1	7.77e-05	83
chr11	70183180	70183266	1	0.000195593	33
chr11	70436622	70436966	1	5.05e-05	228
chr11	70486158	70486244	1	0.000409211	80
chr11	70778730	70778816	1	0.000616851	61
chr11	70844348	70844692	1	4.39e-06	178
chr11	71432978	71433494	1	4.15e-06	252
chr11	71999804	71999976	-1	3.75e-05	-87
chr11	72300460	72300546	1	0.000140554	83
chr11	72580820	72580992	1	0.000448248	174
chr11	72605244	72605760	1	0.000150496	258
chr11	72627776	72627862	1	0.000288166	101
chr11	73198730	73199074	1	4.06e-05	127
chr11	73333922	73334180	-1	0.000829435	-59
chr11	73383974	73384146	-1	0.000768145	-136
chr11	73470232	73470318	1	0.000671406	79
chr11	73493796	73494398	1	6.5e-08	143
chr11	74278632	74278890	1	0.000749296	166
chr11	75342882	75343312	1	1.74e-06	184
chr11	75441266	75441696	1	1.98e-07	706
chr11	75444964	75445050	-1	0.000378123	-52
chr11	75593056	75593314	1	8.33e-05	152
chr11	75831878	75832566	1	2.67e-06	269
chr11	76083600	76083772	1	1.94e-05	72
chr11	76728858	76728944	1	0.000543547	78
chr11	77179412	77179584	1	0.00061501	81
chr11	78313494	78313666	1	0.00109071	84
chr11	78537180	78537438	1	0.00150348	97
chr11	78947572	78947916	1	0.00128555	61
chr11	79200928	79201014	-1	0.000504015	-58
chr11	79794930	79795446	1	3.66e-06	181
chr11	79898044	79898388	1	0.000341202	67
chr11	79908192	79908364	1	0.000209247	70
chr11	82465488	82465918	1	9e-05	38
chr11	83779740	83780256	1	2.66e-05	119
chr11	85664688	85664860	-1	0.000543157	-86
chr11	85750516	85750774	1	0.000450285	55
chr11	86459414	86459758	1	9.32e-05	57
chr11	88420340	88420426	1	0.000170017	96
chr11	92850888	92851146	1	0.00010121	59
chr11	93197210	93197468	1	0.000434104	87
chr11	93768336	93768680	1	0.000164846	299
chr11	94068304	94068906	1	2.76e-05	159
chr11	94957028	94957458	1	0.000666028	148
chr11	96062988	96063332	1	0.000111186	80
chr11	100789652	100789738	1	0.000589995	58
chr11	101070012	101070270	1	0.000497118	78
chr11	102300844	102301532	1	2.15e-07	518
chr11	102306176	102306864	1	4.76e-07	165
chr11	106447936	106448108	1	0.00035752	50
chr11	107128540	107128884	1	0.00119784	123
chr11	109083750	109084306	1	7.96e-07	303
chr11	110184636	110184808	1	0.000536074	64
chr11	110185066	110185668	1	6.08e-05	235
chr11	110196246	110196676	1	1.96e-05	197
chr11	111366964	111367050	-1	0.000731998	-87
chr11	111438344	111438430	1	0.000484937	71
chr11	111441440	111441956	1	2.14e-06	351
chr11	111909280	111909624	1	0.00021197	97
chr11	112366370	112366456	1	0.00247499	35
chr11	112366628	112367058	1	0.000590208	265
chr11	112757240	112757842	1	0.00020378	387
chr11	112942914	112943344	1	1.56e-07	140
chr11	113288118	113288806	1	4.46e-06	146
chr11	113363410	113363926	1	3e-05	172
chr11	113579442	113579872	1	1.7e-05	166
chr11	114071964	114072480	1	1.59e-05	143
chr11	114159856	114160630	1	0.000972962	278
chr11	114162694	114163193	1	1.33e-05	437
chr11	114179034	114179808	1	2.21e-05	1254
chr11	114198126	114198212	1	0.000619065	48
chr11	114315688	114316290	1	5.63e-05	202
chr11	114553736	114553994	1	3.63e-05	70
chr11	114892576	114892748	1	8.42e-05	70
chr11	115559850	115559936	1	0.000375858	66
chr11	115612482	115612740	1	0.000157975	79
chr11	115831180	115831438	1	5.76e-06	81
chr11	115983486	115983744	1	0.00150756	85
chr11	116373582	116374012	1	1.6e-06	185
chr11	116809000	116809172	1	0.000270851	161
chr11	116813644	116814160	1	0.000515446	264
chr11	117228164	117228422	1	0.000229049	113
chr11	117381416	117381846	1	0.00029739	65
chr11	117818382	117818468	1	0.000515061	203
chr11	117854502	117854588	-1	0.000593131	-55
chr11	117945146	117945490	1	0.000110739	710
chr11	118046282	118046368	-1	0.000292089	-38
chr11	118169176	118169262	1	0.000503718	65
chr11	119048096	119048612	1	6.03e-05	399
chr11	119436300	119436558	1	0.000386809	59
chr11	119673746	119673832	-1	0.000586211	-84
chr11	119684496	119684754	1	2.25e-05	242
chr11	120599192	120599364	1	9.05e-05	63
chr11	120613554	120613640	1	0.000666459	78
chr11	120831392	120831478	1	0.000271422	51
chr11	121041060	121041576	1	6.23e-06	237
chr11	121132048	121132392	1	0.000856369	70
chr11	121623624	121623882	-1	0.00038064	-40
chr11	121704120	121704550	1	5.05e-05	133
chr11	122162070	122162586	1	0.000146609	124
chr11	122784710	122785054	1	0.00010111	90
chr11	123200520	123200864	1	0.000292748	48
chr11	123768808	123769152	1	6.73e-07	150
chr11	124618402	124618832	1	8.89e-07	111
chr11	124801152	124801324	1	0.000570252	110
chr11	125102582	125102926	1	0.000184366	191
chr11	125338394	125338910	1	1.3e-07	446
chr11	125344758	125344844	1	0.000319577	66
chr11	126198738	126198910	1	0.00106229	52
chr11	126408062	126408406	1	0.000160028	135
chr11	126468176	126468434	1	0.000271167	149
chr11	127043344	127043516	-1	0.000658543	-39
chr11	127628402	127628574	1	0.00162869	99
chr11	128901546	128901718	1	4.18e-05	132
chr11	129155848	129155934	1	0.000147683	51
chr11	129443260	129443518	1	0.0023753	58
chr11	130123692	130123778	1	0.000424758	70
chr11	130217518	130218120	1	2.74e-05	451
chr11	130429766	130430626	1	1.64e-06	492
chr11	130609936	130610194	1	0.000249369	51
chr11	130886512	130886856	1	0.00150992	118
chr11	131047590	131048020	1	0.00089483	130
chr11	131201358	131201616	1	4.86e-05	103
chr11	131420056	131420228	1	0.000330472	61
chr11	131455144	131455230	1	0.000499316	60
chr11	131655352	131655524	-1	0.000286333	-44
chr11	132334752	132335182	1	1.01e-06	183
chr11	132474846	132474932	1	0.000767715	49
chr11	132849720	132850064	1	6.32e-05	134
chr11	133269142	133269744	1	2.53e-06	320
chr11	133976750	133977008	1	0.000145031	174
chr11	134025168	134025856	1	7.35e-06	178
chr11	134176356	134176614	1	0.00202716	84
chr11	134527408	134527752	1	7.16e-06	192
chr11	134624588	134624674	-1	0.000700399	-55
chr11	134725724	134725810	1	0.000623092	43
chr12	559540	559970	1	0.000145046	152
chr12	1562644	1562988	1	0.000477238	68
chr12	1659910	1660512	1	3.68e-05	271
chr12	1809980	1810496	1	1.78e-07	291
chr12	1937948	1938034	1	0.000858459	67
chr12	2142112	2142370	1	2.06e-05	250
chr12	2170406	2170922	1	3.99e-05	114
chr12	2347910	2348684	1	1.6e-07	665
chr12	2739210	2739382	1	0.00123858	88
chr12	2753830	2754002	1	0.00035532	46
chr12	2980182	2980268	1	0.000452498	51
chr12	3313174	3313518	-1	0.000163664	-213
chr12	3834764	3835194	1	1.54e-06	125
chr12	3958174	3958346	-1	4.17e-05	-56
chr12	4011580	4011924	1	3.59e-06	218
chr12	4145740	4146514	1	7.53e-05	480
chr12	4423864	4424036	1	0.000243852	63
chr12	4472970	4473314	1	2.18e-05	173
chr12	4604980	4605066	1	0.000129048	75
chr12	5408478	5408908	1	0.000269795	63
chr12	5616684	5618146	1	6.17e-08	1047
chr12	5656244	5656588	1	0.000141518	202
chr12	6240012	6240098	1	0.000719504	68
chr12	6373054	6373312	1	0.000619549	100
chr12	6375978	6376666	1	7.36e-07	388
chr12	6497324	6497668	1	0.000608557	42
chr12	6777684	6777770	1	0.00039535	55
chr12	6928528	6928958	-1	0.000200633	-34
chr12	7251060	7251404	1	0.000386666	214
chr12	8194136	8194308	1	0.000158906	44
chr12	9184598	9184684	1	0.000246761	75
chr12	9331572	9331658	1	0.000688029	59
chr12	10476232	10476318	1	7.78e-07	67
chr12	11746022	11746280	-1	0.000406821	-144
chr12	12079186	12079272	1	0.000171507	68
chr12	12624770	12624856	1	0.000573029	51
chr12	12926888	12927060	-1	0.000666957	-57
chr12	13135782	13136212	1	0.000144609	192
chr12	13325584	13325842	1	0.000145115	87
chr12	15188086	15188430	1	5.25e-06	81
chr12	15274602	15275032	1	1.14e-05	146
chr12	16238662	16239178	1	1.44e-05	102
chr12	16586790	16587306	1	0.000111217	76
chr12	17507248	17507936	1	2.46e-06	255
chr12	19221314	19221400	-1	0.000420255	-47
chr12	19745054	19745140	1	0.00050004	45
chr12	20298464	20298722	-1	0.00012536	-49
chr12	22149184	22149700	1	0.000164637	252
chr12	24664254	24664512	1	3.95e-05	79
chr12	25699522	25699694	1	0.000258604	54
chr12	26282602	26282860	-1	0.000371661	-129
chr12	26437230	26437660	1	7.36e-05	50
chr12	27049292	27049464	-1	0.0011423	-52
chr12	29617424	29617682	1	0.000420043	85
chr12	30236710	30236796	1	0.000860191	57
chr12	32453962	32454306	1	1.21e-05	97
chr12	32741546	32742062	1	1.16e-06	159
chr12	32877598	32877770	1	1.57e-05	168
chr12	32917330	32917588	1	0.000353919	48
chr12	34310702	34310788	1	0.00030892	53
chr12	43047548	43047720	1	0.000128238	115
chr12	44835918	44836176	1	0.00179446	133
chr12	45850374	45850804	1	1.48e-07	278
chr12	46389078	46389508	1	7.81e-05	92
chr12	46774014	46774444	1	2.31e-07	99
chr12	47377476	47377562	1	0.000340546	144
chr12	47718380	47718552	1	0.000377581	54
chr12	47846434	47847036	1	4.07e-07	323
chr12	47876792	47876964	-1	0.000602146	-172
chr12	47878082	47878942	1	1.73e-07	1245
chr12	47977584	47977670	1	0.000288274	134
chr12	48464946	48465204	-1	3.61e-05	-63
chr12	48772654	48772912	-1	0.000441821	-40
chr12	49854534	49855222	1	5.59e-07	247
chr12	49866574	49866746	1	0.0013186	51
chr12	49964442	49964614	1	0.00144581	71
chr12	50087938	50088110	-1	0.000245569	-47
chr12	51188308	51188480	-1	0.00173303	-78
chr12	52085460	52085804	1	0.00012788	270
chr12	52126224	52127084	1	5.64e-06	1020
chr12	52215320	52216094	1	4.47e-07	423
chr12	52263308	52263480	-1	0.000153558	-59
chr12	52280164	52280938	1	0.000480057	218
chr12	52494476	52494820	1	4.06e-05	135
chr12	52942708	52942966	1	8.6e-06	177
chr12	53121330	53121674	1	0.00102397	66
chr12	53742078	53742250	-1	0.000221093	-51
chr12	53770372	53770630	1	2.16e-05	59
chr12	53798580	53799010	1	3.16e-05	178
chr12	54197104	54197190	1	0.000161167	62
chr12	54421220	54421564	1	0.000336402	56
chr12	54595886	54596144	1	3.27e-05	189
chr12	55659448	55659964	1	0.00153532	96
chr12	55743556	55743728	-1	0.000795609	-74
chr12	55848046	55848132	1	5.68e-05	58
chr12	56474470	56474986	1	4.53e-06	243
chr12	56961230	56961316	1	0.000186575	48
chr12	57190162	57190248	-1	0.000225495	-69
chr12	57198418	57198504	-1	0.000686442	-71
chr12	57498042	57498300	1	0.000238761	165
chr12	57626268	57626440	1	7.66e-05	160
chr12	58781764	58782022	1	2.55e-05	69
chr12	63010556	63010986	1	0.00024026	184
chr12	63066456	63066542	-1	0.00065679	-25
chr12	63339592	63339936	1	4.26e-07	51
chr12	63955868	63956212	1	0.000380405	90
chr12	64582808	64583410	1	3.53e-05	104
chr12	64736576	64736662	1	0.000417297	61
chr12	66188944	66189460	1	0.000242424	166
chr12	66407470	66407728	1	0.00147458	75
chr12	67792500	67792672	1	0.00038975	122
chr12	68890548	68891236	1	1.4e-05	357
chr12	68980676	68981192	1	1.23e-07	231
chr12	70814454	70814626	1	0.000656732	72
chr12	74817410	74817754	1	1.17e-05	188
chr12	75989074	75989332	1	9.74e-06	82
chr12	76026570	76027000	1	3.29e-05	61
chr12	76266682	76267112	1	5.1e-05	109
chr12	76611456	76612058	1	3.14e-08	152
chr12	77339704	77339962	1	3.13e-05	59
chr12	79327594	79328110	1	1.69e-05	113
chr12	80190088	80190432	1	0.000617519	95
chr12	84361518	84361690	-1	0.00109767	-55
chr12	85527678	85527764	-1	0.00107274	-61
chr12	85527936	85528022	-1	0.00045099	-36
chr12	85765468	85765898	1	0.000148522	85
chr12	88957702	88957788	-1	0.000232372	-42
chr12	89098312	89098398	1	0.000781427	99
chr12	91759066	91759324	1	0.00114147	71
chr12	92551986	92552158	-1	0.000343504	-123
chr12	92957218	92957390	1	1.18e-05	94
chr12	93200426	93200770	1	0.000769698	406
chr12	93221754	93222012	1	6.98e-05	43
chr12	93669900	93669986	-1	0.000323168	-45
chr12	93809908	93810424	1	5.89e-05	401
chr12	93855660	93855746	-1	0.000859183	-53
chr12	94073326	94073842	1	3.08e-05	515
chr12	94127764	94127936	1	0.000642768	108
chr12	94941496	94941754	1	0.00012583	55
chr12	94954224	94954740	1	1.28e-06	202
chr12	95172664	95172922	1	0.00010719	52
chr12	96196924	96197182	1	0.000136475	69
chr12	97054086	97054602	1	0.000529702	308
chr12	97568710	97568968	1	0.000175638	95
chr12	98106124	98106382	1	5.19e-05	68
chr12	98456230	98456488	1	3.63e-05	95
chr12	99172008	99172180	1	5.33e-05	120
chr12	99917886	99918574	1	2.35e-07	202
chr12	100416858	100417116	1	0.00111949	51
chr12	100426834	100427092	1	0.000181905	64
chr12	100471124	100471468	1	0.000542564	84
chr12	100493656	100494086	1	0.000156397	70
chr12	101522990	101523592	1	4.15e-06	275
chr12	101616042	101616472	1	2.78e-05	157
chr12	102417820	102418164	1	6.44e-05	115
chr12	102503132	102503304	1	0.00100693	54
chr12	102618372	102618802	1	4.77e-05	222
chr12	102675304	102675390	-1	0.00123051	-32
chr12	102675562	102675734	-1	0.000633435	-46
chr12	105235782	105236040	1	0.000488413	59
chr12	105257454	105257626	-1	0.000171387	-35
chr12	105485268	105485612	1	5.45e-05	190
chr12	106907622	106907966	1	0.000439411	73
chr12	107023206	107023550	1	4.2e-07	155
chr12	107481758	107481844	1	0.000338493	46
chr12	108072148	108072320	-1	0.000340657	-51
chr12	108146108	108146280	1	0.00085477	44
chr12	108580494	108580752	1	0.00062146	123
chr12	109207262	109207778	1	2.78e-05	222
chr12	109529676	109529848	1	7.71e-06	93
chr12	109786214	109786300	1	0.000353688	81
chr12	110065714	110066058	1	0.000240216	177
chr12	110543530	110543788	1	0.000466551	234
chr12	110917372	110917888	1	3.02e-06	172
chr12	111067356	111068216	1	2.49e-06	1056
chr12	111241764	111242194	1	0.000122017	120
chr12	111644158	111644588	1	0.000137027	141
chr12	111800936	111801108	-1	0.000220178	-68
chr12	112936136	112936652	1	8.85e-05	104
chr12	112938114	112938544	-1	9.56e-06	-631
chr12	113645120	113645292	1	0.000682024	46
chr12	113962202	113962718	1	2.14e-05	469
chr12	114017586	114017758	1	0.000785946	69
chr12	114655878	114656652	1	2.14e-07	321
chr12	115657090	115657348	1	7.27e-05	135
chr12	115817394	115817824	1	1.22e-05	274
chr12	115858072	115858330	1	0.00010369	137
chr12	115945534	115945620	-1	0.00029737	-62
chr12	116426360	116426618	1	0.000684055	328
chr12	116856016	116856446	1	9.53e-06	282
chr12	117026984	117027070	1	0.000815997	91
chr12	117130184	117130528	1	0.00036073	204
chr12	117303560	117303818	-1	9.45e-06	-52
chr12	117368404	117368662	-1	0.000409639	-51
chr12	117518818	117519334	1	6.7e-07	336
chr12	117533868	117534212	1	0.000490797	146
chr12	118030260	118030346	-1	0.000420104	-54
chr12	118537488	118537660	1	0.000222322	75
chr12	119645856	119645942	1	0.000539206	62
chr12	119716548	119716978	1	8.47e-05	103
chr12	120491408	120491666	1	0.000650492	175
chr12	120581020	120581364	-1	4.98e-05	-76
chr12	120722920	120723436	1	0.000160803	150
chr12	121140192	121140278	1	0.000346946	102
chr12	121748384	121749158	1	4.49e-05	284
chr12	122036226	122036914	1	0.000338746	243
chr12	122374808	122374980	1	0.00107269	84
chr12	122400694	122400780	-1	0.000580288	-53
chr12	122690256	122690342	-1	0.00054495	-50
chr12	122851936	122852194	1	0.000101021	111
chr12	124509672	124510274	1	6.33e-06	368
chr12	124574258	124574344	1	0.000582302	67
chr12	124738862	124738948	-1	0.00036974	-135
chr12	124807060	124807146	-1	0.0018045	-41
chr12	124807490	124808092	1	0.000146193	275
chr12	124816520	124816864	1	4.69e-06	363
chr12	124836042	124836300	1	0.000171533	175
chr12	124928062	124928750	1	3.65e-05	564
chr12	126125698	126125784	1	0.000640541	95
chr12	126163796	126163882	-1	0.000314763	-52
chr12	126676442	126676872	1	4.11e-05	95
chr12	127125964	127126308	1	3.69e-06	261
chr12	127238108	127238452	1	0.000378585	98
chr12	127241118	127241548	1	7.86e-06	167
chr12	128049690	128050120	1	2.13e-05	162
chr12	128678608	128678780	1	0.000755003	57
chr12	128680672	128680930	1	0.000100102	93
chr12	128684886	128685144	-1	0.00107234	-50
chr12	128982876	128982962	1	0.000732196	52
chr12	129028800	129029230	1	3.15e-05	242
chr12	129480128	129480214	1	0.000182689	58
chr12	129570772	129571202	1	2.27e-05	149
chr12	130576886	130576972	1	0.000243961	167
chr12	130987192	130987622	1	2.39e-06	224
chr12	131102776	131102948	1	0.000589541	57
chr12	131287676	131288622	1	2.47e-05	763
chr12	131512566	131512652	1	0.000689175	60
chr12	131536216	131536646	1	0.000360728	76
chr12	131756634	131756806	1	0.000162345	89
chr12	131995198	131995370	1	7.75e-05	51
chr12	132178980	132179410	1	0.000151739	158
chr12	132760142	132760486	-1	0.000186973	-122
chr12	132835220	132835564	1	0.000430103	186
chr12	132866094	132867040	1	2.88e-07	468
chr12	132982882	132983484	1	0.000162777	1003
chr13	19178150	19178666	1	2.83e-05	308
chr13	19683314	19683572	1	0.000288827	96
chr13	21330300	21330558	1	0.000219686	129
chr13	22134228	22134400	1	6.1e-06	100
chr13	24631152	24631324	1	6.15e-05	54
chr13	24726698	24726870	1	0.000985308	55
chr13	25511964	25512050	1	0.00015871	38
chr13	25898448	25898534	1	0.00045185	41
chr13	26168316	26168832	1	0.000247914	140
chr13	26179324	26179926	1	0.000179416	240
chr13	26187666	26187752	1	0.000710586	51
chr13	26721640	26721812	1	0.000378812	304
chr13	26768338	26768768	1	8.59e-05	122
chr13	26903530	26904046	1	0.000196426	228
chr13	26924256	26924428	1	0.00076634	96
chr13	27970274	27970360	1	5.75e-05	39
chr13	28394340	28394942	1	2.45e-06	269
chr13	29140390	29140734	1	0.000668422	183
chr13	30072458	30072888	1	0.000107326	238
chr13	30726144	30726574	1	0.000525373	62
chr13	30743430	30744118	1	5.64e-07	312
chr13	31092762	31093536	1	2.68e-07	585
chr13	31195532	31195618	1	0.000514622	77
chr13	31421798	31422142	1	1.29e-05	84
chr13	32873048	32873306	1	0.000158851	283
chr13	33172414	33172586	1	0.000721759	110
chr13	33235882	33236226	1	0.000135659	88
chr13	33509534	33509964	1	0.000302158	169
chr13	33682050	33682222	-1	0.000709617	-60
chr13	33968172	33968602	1	0.000178395	45
chr13	34335478	34335736	1	0.000916434	59
chr13	35858710	35859054	1	7.14e-05	94
chr13	36214664	36214750	1	0.000538467	78
chr13	36262222	36262394	1	6.24e-05	72
chr13	37294910	37295426	1	0.000108215	417
chr13	37446442	37447044	1	0.000234314	145
chr13	40113646	40114076	1	0.000701774	145
chr13	40175566	40175910	1	0.00014674	147
chr13	40221404	40221834	1	4.88e-06	72
chr13	40236110	40236884	1	1.28e-05	247
chr13	40352468	40352726	1	0.00032042	179
chr13	40406734	40406992	1	1.38e-05	125
chr13	40642718	40642804	1	0.000451434	48
chr13	41547438	41547868	1	0.000361688	181
chr13	41966774	41967118	1	4.54e-05	80
chr13	43146006	43146178	1	0.000343003	77
chr13	43805110	43805454	1	0.000495092	134
chr13	44108776	44108948	1	0.00159862	46
chr13	44854654	44854998	1	5.54e-05	95
chr13	44870306	44870994	1	2.04e-07	189
chr13	45178702	45178960	-1	2.22e-05	-43
chr13	45440486	45440744	1	0.000176531	83
chr13	45542568	45542654	1	0.000538836	60
chr13	45810544	45810716	-1	0.00120709	-45
chr13	45812952	45813382	1	6.13e-05	173
chr13	46120058	46120230	1	1.38e-05	153
chr13	47469484	47469742	1	0.000835856	67
chr13	47499240	47499670	1	4.42e-07	152
chr13	47908170	47908256	1	0.000803422	87
chr13	48206934	48207278	1	2.78e-06	105
chr13	49608648	49609164	1	1.33e-05	126
chr13	49797848	49798192	1	0.000158411	119
chr13	49858650	49858994	1	0.000600701	152
chr13	49895974	49896318	1	4.01e-06	121
chr13	50257174	50257346	1	0.00129275	87
chr13	50474238	50474410	1	0.000714945	93
chr13	50691904	50692162	-1	0.000654121	-63
chr13	52364002	52364432	1	9.91e-05	93
chr13	56188508	56188852	1	0.000246094	185
chr13	60111914	60112086	-1	0.00119002	-46
chr13	63855666	63855838	1	0.000743852	71
chr13	66283274	66283532	1	0.000669182	59
chr13	66425690	66425862	1	0.00122881	59
chr13	69639682	69639940	1	0.000583531	67
chr13	72437520	72437864	1	0.000318465	100
chr13	73259078	73259164	1	0.000475073	59
chr13	73342498	73342584	1	0.000495731	80
chr13	74045290	74045634	1	2.13e-05	82
chr13	74687452	74687710	1	0.000129951	90
chr13	75369862	75370378	1	9.16e-07	112
chr13	75947008	75947266	1	9.66e-05	121
chr13	76659002	76659518	1	1.53e-06	96
chr13	77113426	77113684	1	0.000597539	72
chr13	80469748	80470350	1	3.41e-08	434
chr13	80924602	80925032	1	0.000220777	115
chr13	83065142	83065314	1	0.00137611	50
chr13	84871314	84872002	1	4.55e-06	486
chr13	86846379	86846895	1	0.000385136	234
chr13	87234583	87234755	-1	0.00152278	-49
chr13	87283947	87284377	1	0.000114735	91
chr13	90834629	90835059	1	0.000466329	68
chr13	90935765	90936195	1	0.000398077	133
chr13	96223217	96223475	1	0.000236828	245
chr13	96415083	96415599	1	2.05e-05	77
chr13	96650207	96650465	1	0.000261215	207
chr13	96650809	96650895	1	0.000484444	87
chr13	96909669	96909927	1	0.000682727	104
chr13	97257797	97258227	1	0.000124429	70
chr13	98129235	98129923	1	3.37e-06	375
chr13	98650567	98650653	-1	0.000346896	-70
chr13	99239753	99240011	-1	0.000956923	-58
chr13	99724535	99725137	1	8.87e-08	203
chr13	100560713	100561057	1	5.26e-05	207
chr13	102183963	102184135	1	0.000273006	105
chr13	102731611	102732041	1	0.000298075	158
chr13	102950223	102950395	1	0.000101929	96
chr13	108707149	108707579	1	0.000119973	266
chr13	108957323	108957839	1	5.94e-05	186
chr13	109243445	109243875	1	8.85e-05	119
chr13	109274319	109275007	1	4.13e-05	825
chr13	109509529	109509873	1	1.44e-05	218
chr13	109576179	109576695	1	7.02e-06	242
chr13	109750157	109750587	1	0.000545769	42
chr13	109870385	109870557	-1	0.0003528	-52
chr13	109943657	109943743	1	9.73e-05	76
chr13	110208451	110208795	1	4.73e-05	174
chr13	110353447	110353619	1	0.000193901	49
chr13	110480813	110481845	1	0.000110893	368
chr13	110810967	110811397	1	9.75e-05	154
chr13	111049703	111049875	1	0.000591342	65
chr13	112035049	112035221	1	0.000731944	51
chr13	112659495	112659753	1	0.000206183	86
chr13	112730101	112730789	1	0.000198732	495
chr13	112807415	112807501	1	0.000399734	240
chr13	112846545	112846975	1	0.000463013	195
chr13	112926267	112926439	1	0.000277571	87
chr13	112959291	112959549	1	0.000129315	96
chr13	113394021	113394107	1	0.00034295	67
chr13	113410533	113411393	1	1.14e-06	948
chr13	113437451	113437881	1	0.000505816	120
chr13	113455855	113455941	1	0.000411351	35
chr13	113801366	113801968	1	1.35e-07	865
chr13	113998392	113998478	1	0.000296255	279
chr13	114036920	114037264	1	4.65e-06	180
chr13	114073212	114073814	1	7.05e-05	186
chr13	114143216	114143388	1	0.000162584	85
chr13	114167812	114168156	1	0.000126266	145
chr13	114228270	114228614	1	9.29e-05	94
chr13	114298876	114299392	1	4.3e-05	178
chr14	18487629	18487973	1	1.97e-05	125
chr14	20539653	20539825	1	0.000327875	62
chr14	20579127	20579643	1	2.81e-05	109
chr14	20597789	20598305	1	4.69e-05	244
chr14	20934479	20934651	1	0.000419479	117
chr14	21796199	21796629	1	1.84e-05	126
chr14	22097113	22097371	1	2.73e-05	172
chr14	22807559	22808075	1	0.000120744	189
chr14	22841013	22841271	-1	0.000998004	-60
chr14	23078803	23078975	-1	0.000526923	-73
chr14	23153967	23154311	1	0.000166506	167
chr14	23434843	23435273	1	2.11e-05	196
chr14	24322535	24322621	1	0.000327355	63
chr14	25122163	25122679	1	4.18e-06	158
chr14	26966949	26967121	1	0.000687811	122
chr14	30229531	30229703	1	0.000194616	64
chr14	30840389	30840733	-1	0.000225177	-67
chr14	30909017	30909189	1	6.05e-05	165
chr14	32006721	32006893	-1	2.67e-05	-74
chr14	32023061	32023319	1	0.000635123	167
chr14	32354935	32355021	1	0.00047625	89
chr14	32908259	32908517	1	0.000135608	89
chr14	33121195	33121453	1	0.000950512	51
chr14	34320981	34321067	1	0.000546931	44
chr14	34325453	34325539	1	0.000281965	61
chr14	34496851	34497195	1	0.000398714	236
chr14	35051981	35052239	1	9.99e-05	73
chr14	35338275	35338361	1	0.000659578	54
chr14	35344037	35344123	1	0.000204899	79
chr14	36409147	36409233	1	0.000282866	48
chr14	36996871	36997043	1	0.00145176	81
chr14	37047095	37047611	1	5.93e-05	133
chr14	37363747	37364177	1	1.55e-06	256
chr14	37779127	37779299	1	0.000289986	63
chr14	41722743	41723259	1	2.7e-06	227
chr14	41723947	41724033	1	0.00057023	88
chr14	42285269	42285355	1	0.000695669	41
chr14	42961401	42962003	1	2.04e-05	97
chr14	44513357	44513615	1	5.45e-05	101
chr14	45253473	45253903	1	2.55e-05	172
chr14	45587669	45588099	1	0.000196588	85
chr14	48097063	48097493	1	8.76e-05	85
chr14	49344493	49344579	1	0.000231868	62
chr14	49425505	49425677	-1	0.000757249	-31
chr14	49493359	49493445	1	0.000648263	37
chr14	49493703	49493961	1	0.000139051	152
chr14	49998953	49999469	1	4.14e-06	103
chr14	51331867	51332125	1	0.000133444	108
chr14	51474799	51474885	1	7.16e-05	116
chr14	52003527	52003613	1	0.000327214	46
chr14	52103459	52103803	1	1.09e-05	61
chr14	52457951	52458381	1	9.1e-05	145
chr14	53087299	53087729	1	3.08e-06	63
chr14	54126953	54127469	1	2.71e-05	203
chr14	54565123	54565209	-1	0.000311937	-67
chr14	54669957	54670129	1	0.000283889	151
chr14	55241685	55242201	1	0.000386096	173
chr14	56007601	56007773	1	0.000362651	91
chr14	56339561	56339733	1	0.000374033	33
chr14	56662319	56662491	-1	3.48e-05	-50
chr14	57550441	57550957	1	6.57e-05	218
chr14	57928411	57928669	-1	0.000244789	-60
chr14	58991113	58991199	1	0.000826146	38
chr14	59151417	59151589	-1	0.000140656	-52
chr14	59695023	59695711	1	3.37e-05	805
chr14	61466021	61466623	1	0.000160679	446
chr14	61542647	61542819	1	0.00055265	86
chr14	61545657	61546087	1	1.32e-05	464
chr14	62694101	62694359	1	0.00186847	206
chr14	63564507	63564593	1	0.000544559	102
chr14	63678113	63678457	1	0.00100472	97
chr14	64082915	64083431	1	2.61e-06	190
chr14	64792931	64793447	1	5.93e-05	349
chr14	65024959	65025389	1	8.69e-07	325
chr14	65081461	65081547	-1	0.00086881	-76
chr14	65349093	65349523	1	0.000363924	215
chr14	65364745	65365089	1	9.13e-05	133
chr14	66335513	66335857	1	4.29e-05	88
chr14	66704453	66704883	1	0.00159159	69
chr14	67359171	67359257	1	0.00102607	59
chr14	67359429	67359601	1	0.000355286	143
chr14	67490149	67490579	1	0.000251273	143
chr14	67526785	67526957	-1	9.6e-05	-54
chr14	68468915	68469001	1	0.000476924	111
chr14	68472871	68473043	1	1.83e-05	70
chr14	69755733	69756077	1	0.000374872	110
chr14	69887915	69888431	1	0.00035361	249
chr14	70785497	70785927	1	0.000501779	292
chr14	71143515	71143773	1	0.000943596	185
chr14	72266245	72266417	1	0.000318993	51
chr14	72844509	72844853	1	0.000138448	117
chr14	73198571	73198743	1	0.000533443	56
chr14	73744241	73744327	1	4.5e-05	60
chr14	73838411	73838583	1	0.000852037	59
chr14	74290169	74290255	-1	6.95e-05	-64
chr14	74336867	74337211	1	5.55e-06	135
chr14	74534065	74534667	1	2.81e-06	176
chr14	74941963	74942393	1	5.19e-06	190
chr14	75340831	75341433	1	2.51e-08	306
chr14	75441365	75441537	-1	0.000335316	-53
chr14	75535621	75536395	1	2.05e-07	727
chr14	75626695	75627383	1	1.03e-05	372
chr14	75724993	75725337	1	0.00103294	154
chr14	76139685	76140029	1	4.19e-05	134
chr14	76730161	76730333	1	0.000798699	77
chr14	76974487	76974831	-1	8.56e-05	-50
chr14	77067883	77068055	1	0.000701468	69
chr14	77076311	77076569	1	1.47e-07	116
chr14	77184671	77185273	1	2.39e-08	311
chr14	77209869	77210127	-1	0.00104425	-53
chr14	77250805	77251407	1	1.71e-05	355
chr14	78576581	78577097	1	3.64e-05	89
chr14	78591115	78591287	1	0.000126552	56
chr14	79045281	79045797	1	0.000557506	331
chr14	79861851	79861937	1	0.0004079	83
chr14	83793083	83793255	1	0.00122209	74
chr14	85023743	85023829	1	0.000100856	44
chr14	85880733	85881077	1	6.49e-05	85
chr14	85944631	85944889	-1	2.06e-05	-49
chr14	86748129	86748473	1	0.000105305	74
chr14	88554817	88554989	1	0.000107829	61
chr14	88630497	88630669	-1	0.000577905	-46
chr14	89801215	89801301	1	0.000615444	62
chr14	90448365	90448537	-1	0.000327021	-132
chr14	90587943	90588201	1	0.000158988	246
chr14	91158209	91158467	1	1.72e-05	253
chr14	91258399	91258571	1	0.000840132	284
chr14	92443221	92443307	1	0.000238667	129
chr14	92866255	92866599	1	1.59e-05	180
chr14	94561401	94561659	1	0.000576136	177
chr14	94598983	94599671	1	1.92e-08	467
chr14	95042657	95043173	1	6.2e-06	207
chr14	95069747	95069919	1	0.000496786	138
chr14	95304613	95304785	1	0.00105188	74
chr14	95389839	95389925	1	0.000235214	148
chr14	95437053	95437225	1	0.000629727	62
chr14	96030195	96030797	1	8.61e-07	274
chr14	96053931	96054447	1	6.02e-05	223
chr14	96983677	96984365	1	1.77e-06	421
chr14	98219497	98220099	1	4.41e-05	151
chr14	99615965	99616395	1	2.59e-05	98
chr14	99743503	99743675	1	0.000202637	113
chr14	100030829	100030915	1	0.000833764	67
chr14	100131105	100131191	1	0.000669275	46
chr14	100494799	100495229	1	9.32e-05	103
chr14	100556117	100556633	1	6.87e-05	190
chr14	100842067	100842239	-1	0.000844327	-58
chr14	100872167	100872941	1	1.77e-05	118
chr14	101040641	101041157	1	4.25e-07	226
chr14	101255641	101255813	1	0.000207239	82
chr14	101323495	101323839	1	0.000561918	297
chr14	101467373	101467545	1	0.000148892	143
chr14	101720041	101720471	1	5.67e-05	300
chr14	101759085	101759515	1	3.29e-05	202
chr14	101878109	101878453	1	0.000564295	136
chr14	102020783	102020869	1	0.000781343	56
chr14	102225893	102226065	-1	0.000210867	-64
chr14	102697259	102697431	1	0.0006035	60
chr14	103071445	103071961	1	8e-05	236
chr14	103105329	103105415	1	0.000880982	55
chr14	103215753	103215925	1	0.000339243	62
chr14	103844155	103844327	1	0.00103533	33
chr14	103861355	103862043	1	5.33e-06	156
chr14	104005491	104005749	1	0.000141166	148
chr14	104143521	104143607	-1	0.000296183	-82
chr14	104429213	104429385	1	0.000856439	88
chr14	105097777	105097863	1	0.000841286	154
chr14	105343049	105343393	1	0.00123683	79
chr14	105469899	105469985	-1	0.000528102	-64
chr14	105490969	105491141	1	0.000772649	53
chr15	20358334	20358592	-1	4.64e-05	-81
chr15	24919560	24919990	1	1.83e-07	174
chr15	25504360	25504704	1	0.000314229	119
chr15	25684530	25684702	1	5.43e-05	109
chr15	26624596	26624682	-1	0.000604176	-71
chr15	26628122	26628552	1	1.11e-05	102
chr15	26970746	26970832	-1	3.02e-05	-60
chr15	33504854	33505370	1	8.09e-07	154
chr15	34355652	34355738	1	0.000858867	89
chr15	34682538	34683054	1	3.67e-05	211
chr15	34716164	34716508	1	0.000242558	143
chr15	35308790	35309220	1	7.8e-05	210
chr15	37320244	37320330	1	0.000224734	100
chr15	37911236	37911408	1	0.000899775	55
chr15	38187554	38187984	1	3.55e-05	90
chr15	38694438	38694954	1	0.000151829	145
chr15	38888798	38888970	1	4.29e-05	121
chr15	39283452	39283968	1	5.72e-07	116
chr15	39828778	39829036	1	0.000475775	100
chr15	40095550	40095722	1	0.00117393	68
chr15	40390100	40390530	1	4.49e-07	222
chr15	41029682	41029854	1	0.000514502	74
chr15	41950484	41950656	-1	0.00108369	-64
chr15	43804988	43805246	1	0.000471025	133
chr15	45139622	45140224	1	1.17e-05	156
chr15	46710498	46710842	1	5.23e-05	167
chr15	47669914	47670258	1	0.000137793	128
chr15	48006174	48006346	1	0.000120627	79
chr15	48017698	48018214	1	3.08e-06	376
chr15	48555026	48555456	1	7.35e-05	197
chr15	51132618	51133134	1	0.000109747	135
chr15	51203826	51203912	1	0.000595608	54
chr15	51338244	51338932	1	2.36e-08	172
chr15	52873688	52873860	1	0.00135828	82
chr15	53910332	53910590	-1	6.22e-05	-144
chr15	54150358	54150702	1	0.000447957	175
chr15	55387038	55387296	1	0.000797376	91
chr15	55915938	55916454	1	2.88e-05	207
chr15	56292360	56292446	1	0.000358708	44
chr15	56564120	56564464	1	0.000185654	145
chr15	57298818	57298904	-1	0.00151578	-45
chr15	57299076	57299162	-1	0.000470567	-58
chr15	58135598	58136028	1	1.21e-06	123
chr15	58251612	58252128	1	3.8e-06	371
chr15	61048418	61048590	1	1.47e-05	74
chr15	61702276	61702792	1	0.000175382	163
chr15	61745964	61746222	1	0.000237753	67
chr15	61795930	61796274	1	2.03e-06	158
chr15	62112926	62113270	1	0.000114382	215
chr15	62354672	62354758	-1	0.000415804	-39
chr15	62624282	62624454	1	8.07e-05	55
chr15	62753454	62753626	1	0.000675898	142
chr15	63340662	63341522	1	4.19e-06	776
chr15	63369644	63369816	-1	0.000625366	-49
chr15	63469404	63469662	1	0.000188039	102
chr15	64674092	64674436	1	0.000200434	104
chr15	66390738	66391168	1	0.000521621	56
chr15	66661552	66661810	1	0.000531032	274
chr15	66670238	66670410	-1	0.000303847	-44
chr15	66679698	66679784	1	0.000766641	107
chr15	68021900	68022502	1	3.04e-06	215
chr15	68158210	68158382	1	0.000987929	70
chr15	68374672	68374758	1	0.000708239	80
chr15	68592682	68593026	1	1.32e-06	227
chr15	68676102	68676446	1	0.000265353	43
chr15	69035238	69035582	1	0.000830396	247
chr15	69615566	69615996	1	9.15e-05	282
chr15	70271488	70271832	1	0.000310229	155
chr15	70321110	70321282	1	0.000677793	62
chr15	70362390	70362734	1	0.00021061	130
chr15	70423020	70423106	-1	0.000693653	-101
chr15	70447272	70447444	-1	0.00010461	-55
chr15	71549878	71550222	1	0.000282027	69
chr15	71673546	71673976	1	0.00133171	92
chr15	72317170	72317256	1	0.000390688	60
chr15	72734700	72734872	-1	0.000744037	-53
chr15	73318382	73318554	1	0.000573948	110
chr15	73988064	73988322	1	0.000429618	313
chr15	74296030	74296116	-1	0.000587025	-61
chr15	74371968	74372398	1	1.71e-07	145
chr15	74386760	74387104	1	0.000299935	521
chr15	75176326	75176756	1	4.81e-06	165
chr15	76177194	76178140	1	1.69e-05	881
chr15	77027648	77027906	1	0.00149415	129
chr15	77043386	77043644	1	4.21e-05	174
chr15	77603676	77603762	1	0.000202655	109
chr15	77705758	77705844	-1	0.000765894	-58
chr15	78012778	78012950	1	0.00119532	84
chr15	78419300	78419730	-1	0.000436719	-92
chr15	78707744	78707916	1	0.000122193	61
chr15	78798216	78798990	1	1.46e-05	388
chr15	78914488	78914832	1	1.04e-06	155
chr15	79026288	79026718	1	0.000115634	130
chr15	79130348	79130520	1	0.000393357	101
chr15	79539880	79539966	-1	0.000862039	-84
chr15	79543320	79543406	1	0.000692256	47
chr15	79846040	79846126	1	0.000276722	45
chr15	80596992	80597164	1	0.000772563	86
chr15	82045834	82045920	-1	0.00082013	-36
chr15	82897836	82897922	-1	0.000450082	-52
chr15	82919422	82919766	1	1.83e-06	82
chr15	83990208	83990294	1	0.000482348	32
chr15	83991240	83991584	1	0.000160043	307
chr15	84145094	84145266	1	7.14e-05	54
chr15	84910628	84910714	1	7.62e-05	35
chr15	85073684	85073942	-1	0.000262612	-81
chr15	85331082	85331512	1	6.46e-05	133
chr15	85616000	85616086	1	0.000358155	75
chr15	85762630	85763146	1	1.53e-05	548
chr15	87099844	87100274	1	0.000714803	138
chr15	87949352	87949782	1	0.00072138	245
chr15	87994502	87994588	1	0.000126129	48
chr15	88124104	88124448	1	0.000410805	91
chr15	88485132	88485218	1	0.000875257	44
chr15	88623162	88623420	-1	0.000549183	-112
chr15	88714580	88715096	1	0.000114595	113
chr15	88791636	88792238	1	0.000248881	189
chr15	88916078	88916508	1	7.18e-06	50
chr15	89337650	89337908	1	0.000285584	117
chr15	89728262	89728434	1	0.000361028	49
chr15	90762240	90762412	1	2.57e-05	98
chr15	90881350	90881608	1	0.000162833	112
chr15	91041740	91042514	1	1.34e-06	619
chr15	91098414	91099016	1	6.81e-05	109
chr15	91099188	91099274	1	0.00299162	44
chr15	91169536	91169880	-1	9.61e-05	-52
chr15	91632904	91633334	1	0.000702489	108
chr15	91793810	91794068	1	0.000237859	87
chr15	92429694	92429780	-1	2.66e-05	-71
chr15	93042788	93042960	1	0.000460134	50
chr15	93155534	93155706	1	5.72e-05	81
chr15	94360394	94360652	1	3.31e-05	104
chr15	94853862	94854378	1	3.89e-06	187
chr15	95326518	95327120	1	8.06e-06	205
chr15	95700446	95700532	1	0.000365455	63
chr15	96336416	96336502	1	0.000672636	43
chr15	96776908	96777166	-1	0.000983638	-47
chr15	96780348	96780434	1	0.000535355	91
chr15	97892672	97892930	1	0.000934631	129
chr15	99096844	99097188	1	0.000443691	204
chr15	99097360	99097446	1	0.00129544	96
chr15	100206502	100206674	1	0.000223961	62
chr15	100279430	100279516	1	0.000748662	71
chr15	100346166	100346252	1	0.000257715	49
chr15	100346768	100347198	1	3.38e-05	154
chr15	100872486	100872572	-1	0.000443911	-48
chr15	101246414	101246930	1	0.000146529	77
chr15	101411534	101411706	1	0.000120298	115
chr15	101464940	101465800	1	8.9e-09	977
chr15	101615354	101615956	1	3.54e-05	263
chr16	33908	33994	-1	0.000174419	-70
chr16	184064	184408	-1	0.000233361	-51
chr16	737560	738162	1	2.88e-05	280
chr16	743838	744182	1	0.000270641	101
chr16	825108	825194	-1	0.000878176	-77
chr16	850048	850478	1	7.62e-06	140
chr16	959440	960214	1	6.33e-06	719
chr16	974662	975350	1	1.23e-06	191
chr16	1094804	1094890	-1	6.13e-05	-65
chr16	1097728	1098072	1	0.000149595	127
chr16	1333368	1333540	1	0.000538085	43
chr16	1519128	1519214	-1	0.000203742	-82
chr16	1532286	1532974	1	7.55e-07	497
chr16	1658792	1658964	1	0.00130597	60
chr16	1784008	1784524	-1	1.99e-05	-50
chr16	1935282	1935712	1	1e-05	165
chr16	2085954	2086728	1	9.55e-06	976
chr16	2187090	2187176	1	0.000368941	115
chr16	2769568	2770256	1	8.54e-06	441
chr16	3486808	3486980	1	0.000126072	90
chr16	3596286	3596716	1	3.33e-05	158
chr16	3717632	3717804	1	0.000841155	72
chr16	3740766	3740852	1	0.000835762	68
chr16	3971332	3971418	1	0.000815664	167
chr16	4212218	4212992	1	4.07e-09	680
chr16	5392998	5393428	1	0.000450382	192
chr16	5412778	5413036	1	0.000633876	108
chr16	6045652	6045910	1	0.000992671	75
chr16	6246204	6246290	1	0.000344066	52
chr16	6524586	6525016	1	8.32e-05	76
chr16	6534304	6534734	1	0.00014891	86
chr16	7482454	7483142	1	3.05e-06	409
chr16	7555296	7555812	1	5.34e-05	145
chr16	8055730	8056246	1	6.45e-05	134
chr16	8578266	8578438	1	0.002435	44
chr16	8578610	8578696	1	0.00214177	33
chr16	8616192	8616794	1	1.72e-05	98
chr16	10112076	10112334	1	7.17e-05	395
chr16	10221468	10221554	1	0.000332085	34
chr16	10520404	10521006	1	1.19e-05	280
chr16	10601760	10602362	1	3.65e-06	192
chr16	10947136	10947652	1	0.000239009	251
chr16	10961326	10961756	1	8.19e-05	177
chr16	11010862	11011464	1	2.11e-06	144
chr16	11017054	11017312	1	0.000168184	89
chr16	11061086	11061172	1	0.000255908	84
chr16	11224056	11224744	1	9.27e-06	399
chr16	11309884	11310228	1	5.9e-05	154
chr16	11700496	11700582	1	0.000818648	49
chr16	11834140	11834484	1	0.000452603	67
chr16	12137290	12137806	1	9.87e-06	316
chr16	12532030	12532460	1	1.36e-05	187
chr16	13110208	13110638	1	0.000217926	228
chr16	13332088	13332346	1	0.00056336	58
chr16	14165428	14165772	1	0.000669582	217
chr16	19049528	19049872	1	2.02e-05	98
chr16	19369706	19369792	1	0.000265684	93
chr16	20331702	20331874	1	1.24e-05	85
chr16	20440062	20440234	1	2.9e-06	61
chr16	20587466	20587810	1	0.000212794	108
chr16	20617824	20618340	1	2.72e-05	153
chr16	22685264	22685608	1	0.000121486	254
chr16	23124294	23124638	1	0.000991126	195
chr16	23258196	23258884	1	2.08e-06	322
chr16	23522904	23523076	-1	0.000595307	-51
chr16	23564958	23565216	1	0.000605782	98
chr16	23963654	23964084	1	2.05e-05	88
chr16	24701018	24701276	1	0.000467293	188
chr16	25384374	25384460	1	0.000382224	63
chr16	26830464	26830550	1	0.000210673	96
chr16	26835538	26835624	1	0.000610229	55
chr16	27286522	27286608	-1	0.000552074	-48
chr16	27887404	27887490	1	0.00021771	63
chr16	28017006	28017436	1	2.34e-05	227
chr16	28512194	28512280	-1	0.000366335	-86
chr16	29178178	29178608	1	4.25e-05	171
chr16	29228574	29228832	1	0.000399902	64
chr16	29841066	29841152	1	0.000876582	54
chr16	30527518	30527604	1	0.000387555	85
chr16	30823874	30824304	1	7.4e-05	127
chr16	30898780	30899382	1	2.44e-09	316
chr16	35516630	35517060	1	3.04e-05	122
chr16	35556018	35556362	-1	0.000362847	-48
chr16	35575626	35575712	-1	0.000460352	-62
chr16	35617250	35617508	-1	0.00036049	-55
chr16	46742820	46742992	1	0.000105803	165
chr16	47713244	47713588	1	0.000525322	88
chr16	48165346	48165776	1	8.91e-05	244
chr16	48492920	48493264	1	1.98e-06	89
chr16	48690634	48690720	1	0.000404318	40
chr16	49416474	49416646	1	0.00093536	68
chr16	49442532	49442618	-1	0.000208465	-48
chr16	49542292	49542894	1	3.33e-05	398
chr16	50002134	50002650	1	0.00115796	137
chr16	50284472	50284644	-1	0.000385739	-102
chr16	50334008	50334438	1	0.000307835	47
chr16	50679814	50679900	-1	0.000609033	-67
chr16	50990876	50990962	1	0.000587368	46
chr16	54080598	54081114	1	1.77e-05	125
chr16	56320812	56321070	1	5.72e-05	59
chr16	56547078	56547594	1	7.84e-06	397
chr16	56625510	56625768	1	3.99e-05	134
chr16	57671700	57671872	1	0.000667146	45
chr16	58413450	58413536	1	0.000113409	90
chr16	58464018	58464190	1	4.96e-05	63
chr16	59597326	59597756	1	0.000350579	325
chr16	59761930	59762274	1	0.00118619	44
chr16	60646526	60646956	1	8.11e-05	107
chr16	64881080	64881510	1	0.000177017	214
chr16	65113710	65114054	1	0.00040231	98
chr16	66300252	66300424	1	0.00112066	62
chr16	66516800	66517316	1	6.4e-06	301
chr16	66884966	66885138	1	0.000381376	153
chr16	66971310	66971482	1	0.000435289	134
chr16	66972600	66972686	1	0.000111114	85
chr16	66996680	66996766	1	6.34e-05	50
chr16	66997368	66997454	1	0.000440849	31
chr16	67000464	67000894	1	7.4e-05	205
chr16	67165154	67165240	1	0.00081978	51
chr16	67173668	67174184	1	1.3e-06	194
chr16	67206692	67207208	1	0.000135123	393
chr16	67230342	67230428	1	0.000335841	69
chr16	67244532	67244618	-1	0.000751771	-83
chr16	67483956	67484472	1	2.53e-05	278
chr16	67726304	67726992	1	2.62e-05	253
chr16	67980348	67980606	-1	0.000206298	-124
chr16	68084752	68084838	-1	0.000876674	-97
chr16	68384634	68384720	-1	0.00027662	-61
chr16	68396416	68396502	1	0.000261654	114
chr16	68775246	68775590	1	7.83e-05	104
chr16	69039696	69039868	1	2.71e-05	76
chr16	70262272	70262358	1	0.000296409	30
chr16	70370976	70371234	1	6.54e-05	132
chr16	71442622	71443138	1	3.91e-07	442
chr16	72019166	72019596	1	2.13e-05	180
chr16	72291270	72291958	1	0.000115434	300
chr16	72677754	72678270	1	7.75e-07	146
chr16	72877446	72877790	1	0.000781016	147
chr16	72986064	72986322	1	0.000669824	118
chr16	72989934	72990622	1	4.9e-06	662
chr16	73019776	73019862	-1	4.87e-05	-76
chr16	74620150	74620236	1	0.000508512	61
chr16	74676222	74676480	1	0.0002103	159
chr16	74793526	74793870	1	3.74e-05	195
chr16	74974470	74974986	1	0.000708005	115
chr16	75619986	75620760	1	1.18e-06	338
chr16	76309878	76309964	-1	0.000228269	-108
chr16	76640032	76640118	1	0.000696508	128
chr16	77713054	77713226	1	0.000413742	72
chr16	78168338	78168510	1	0.000215307	47
chr16	78413782	78414040	1	0.000325181	51
chr16	80282906	80283078	1	1.64e-05	88
chr16	80300966	80301138	1	0.000163058	37
chr16	80614866	80615038	1	0.000722784	56
chr16	80687622	80687966	1	0.000353723	113
chr16	81141272	81141702	1	7.82e-06	154
chr16	81159074	81159504	1	0.000245062	213
chr16	81196742	81196828	1	0.000319388	106
chr16	81437972	81438316	1	0.000122349	206
chr16	81438660	81438832	1	0.0012657	42
chr16	81556480	81557168	1	5.2e-06	251
chr16	81584086	81584430	1	0.00123071	187
chr16	81604812	81605414	1	4.95e-05	356
chr16	81613928	81614014	-1	0.000470732	-47
chr16	82396184	82396872	1	1.5e-05	236
chr16	83019942	83020286	1	6.45e-05	102
chr16	83073090	83073262	1	0.000546287	70
chr16	83077906	83078164	1	0.00139935	121
chr16	83199080	83199510	1	0.000258797	110
chr16	83247670	83247928	1	7.51e-05	124
chr16	83320254	83320598	1	8.15e-06	71
chr16	83534480	83534566	1	0.000281114	64
chr16	83919244	83920190	1	9.07e-06	678
chr16	83939110	83939196	-1	0.000783207	-76
chr16	84199948	84200292	1	0.000481112	265
chr16	84358704	84358962	1	6.36e-05	113
chr16	84528640	84528726	1	0.000243998	26
chr16	84649470	84649900	1	1.59e-05	127
chr16	84822502	84822846	1	2.16e-05	74
chr16	84832478	84832994	1	1.42e-07	410
chr16	85160482	85160654	1	0.000275117	137
chr16	85196946	85197032	-1	0.000347905	-68
chr16	85401970	85402314	1	0.00016145	186
chr16	85594782	85595470	1	1.33e-09	451
chr16	85851492	85851664	-1	0.000553871	-49
chr16	85936804	85937234	1	4.94e-05	138
chr16	85940330	85940674	1	6.02e-05	104
chr16	85994940	85995370	1	5.13e-05	312
chr16	86180012	86180184	-1	9.89e-05	-34
chr16	86180528	86180700	-1	0.000274999	-56
chr16	86545512	86545684	1	7.96e-05	98
chr16	86596510	86596596	-1	0.000299312	-66
chr16	86658000	86658258	1	3.13e-05	96
chr16	86664278	86664794	1	0.0002377	170
chr16	86720866	86721038	1	0.000723054	234
chr16	86738238	86738840	1	8.04e-05	279
chr16	86778142	86778572	1	5.41e-05	327
chr16	86951690	86952464	1	2.94e-10	1211
chr16	87033046	87033304	-1	0.000228865	-76
chr16	87219494	87220010	1	0.000262874	191
chr16	87326134	87326822	1	2.8e-05	352
chr16	87379196	87379368	1	0.00129522	73
chr16	87679508	87679594	-1	0.000447505	-48
chr16	87715800	87716574	1	9.6e-06	524
chr16	87725260	87725346	1	0.000285902	44
chr16	87750286	87750372	1	0.000626973	40
chr16	87779182	87779268	-1	0.000549975	-201
chr16	87898034	87898206	1	0.000454015	78
chr16	87953590	87953762	1	0.00120479	60
chr16	88021100	88021272	-1	0.000572758	-59
chr16	88077344	88077688	1	0.000182998	153
chr16	88109250	88110110	1	3.81e-06	313
chr16	88472600	88472686	1	0.000653888	56
chr16	88536928	88537100	1	0.000482736	167
chr16	88541744	88541916	-1	0.000329155	-40
chr16	88570124	88570468	1	0.000518756	85
chr16	88643998	88644084	1	0.000656495	70
chr16	88839562	88839648	1	0.000343265	105
chr16	88952738	88952910	1	0.000149779	87
chr16	88959188	88959274	1	6.61e-05	94
chr16	88973808	88973894	1	8.4e-05	232
chr16	88983870	88984816	1	4.29e-05	679
chr16	89184422	89184508	1	0.000626211	69
chr16	89261650	89262080	1	8.27e-06	222
chr16	89300436	89300522	1	0.000678351	130
chr16	89300952	89301038	1	0.000364544	55
chr16	89460654	89460998	1	7.08e-05	106
chr16	89579334	89581742	1	3.73e-09	1350
chr16	89613304	89613734	1	1.88e-06	80
chr16	89733360	89733532	1	0.000817389	62
chr16	89822886	89823058	1	3.54e-05	65
chr16	89869928	89870014	1	0.00044714	50
chr16	89871906	89872164	-1	6.3e-06	-70
chr16	89904586	89904844	1	0.00122995	181
chr16	89905790	89905962	1	0.000370504	163
chr16	89992392	89992478	-1	0.000681611	-57
chr17	1800289	1800375	1	0.000361737	69
chr17	1888697	1888955	1	0.00115114	163
chr17	1981405	1982093	1	8.54e-06	383
chr17	2549435	2549865	1	6.03e-05	243
chr17	2998527	2998871	-1	0.000622084	-141
chr17	3182567	3183255	1	2.61e-05	245
chr17	3674057	3674315	1	0.000190038	58
chr17	3795059	3795489	1	2.75e-05	180
chr17	4161247	4161677	1	4.46e-05	214
chr17	5433531	5433789	1	0.000322052	102
chr17	6003109	6003711	1	0.000216236	191
chr17	7228179	7228523	1	2.53e-06	153
chr17	7834393	7834651	1	0.00086797	126
chr17	7959695	7959867	1	0.000978557	101
[truncated: 3,370 more rows]
